# Supplementary material
Source: HighWire-hosted journal article supplement (https://bmjopen.bmj.com/content/9/5/e029554)
Supplement: inline-supplementary-material-2 [file inline-supplementary-material-2.pdf]

## Supplementary File 2, Dataset 2.

### Omega-3, omega-6 and total PUFA long-term RCT Database

(Supplementary File 2 for Hooper et al “Creation of a database to assess effects of omega-3, omega-6 and total polyunsaturated fats on health: methodology for a set of systematic reviews”)

#### Characteristics of 96 included studies without relevant outcome data for our review set

##### Annuzzi 2014 - NCT01154478 <sup>1-3</sup>

|                      |                                                                                                                                                                                                                                                                                                                                                                                                                                                                                                                                                                                                                     |
|----------------------|---------------------------------------------------------------------------------------------------------------------------------------------------------------------------------------------------------------------------------------------------------------------------------------------------------------------------------------------------------------------------------------------------------------------------------------------------------------------------------------------------------------------------------------------------------------------------------------------------------------------|
| <b>Methods</b>       | RCT 2x2, (diet rich in LCn3 vs diet low in LCn3), 48 months (other intervention increases polyphenols)<br>Summary risk of bias: not yet assessed                                                                                                                                                                                                                                                                                                                                                                                                                                                                    |
| <b>Participants</b>  | Overweight/ obese adults with a large waist circumference and another component of the metabolic syndrome<br>N: 38 high LCn3 int., 40 low LCn3 control (of whom 39 were on high polyphenols, 39 on low polyphenols)<br>Level of risk for CVD: moderate<br>Location: Italy                                                                                                                                                                                                                                                                                                                                           |
| <b>Interventions</b> | Type: Diet provided for 8 weeks, unclear how it worked for remaining 46 months<br>Comparison: diet rich in LCn3 vs diet low in LCn3<br>Intervention: 1.5%E from n3 (0.46%E EPA, 0.59%E DHA) high LCn3 & high polyphenol, 1.4%E from n3 (0.40%E EPA, 0.53%E DHA) high LCn3 & low polyphenol.<br>Control: 0.5%E from n3 (0.04%E EPA, 0.01%E DHA) low LCn3 & high polyphenol, 0.5%E from n3 (0.02%E EPA, 0.01%E DHA) low LCn3 & low polyphenol.<br><b>PUFA Dose:</b> (achieved) increase <b>1%E n-3, 1%E LCn3, -0.3% n-6, 0.7%E PUFA</b><br>Duration of intervention: 48 months according to ClinicalTrials.gov entry. |
| <b>Outcomes</b>      | Main study outcome: incremental AUC (unclear of what) after TG test meal<br>Available outcomes: outcomes only reported at up to 8 weeks of intervention (body weight, lipids, oxidative measures, glucose, insulin, QUICKI, HOMA-B)                                                                                                                                                                                                                                                                                                                                                                                 |
| <b>Notes</b>         | Trials registry reports this to be a 48 month trial (was this incorrect?), but only 8 week data located                                                                                                                                                                                                                                                                                                                                                                                                                                                                                                             |

#### Risk of bias table

| Bias                                                      | Authors' judgement | Support for judgement |
|-----------------------------------------------------------|--------------------|-----------------------|
| Random sequence generation (selection bias)               | Unclear risk       |                       |
| Allocation concealment (selection bias)                   | Unclear risk       |                       |
| Blinding of participants and personnel (performance bias) | Unclear risk       |                       |
| Blinding of outcome assessment (detection bias)           | Unclear risk       |                       |
| Incomplete outcome data (attrition bias)                  | Unclear risk       |                       |

|                                      |              |
|--------------------------------------|--------------|
| Selective reporting (reporting bias) | Unclear risk |
| Other bias                           | Unclear risk |

## AREDS2 Pilot - Huang 2008 – NCT00121589 <sup>4 5</sup>

|                      |                                                                                                                                                                                                                                                                        |
|----------------------|------------------------------------------------------------------------------------------------------------------------------------------------------------------------------------------------------------------------------------------------------------------------|
| <b>Methods</b>       | RCT 2x2, (LCn3 vs unclear placebo), 6 months (other intervention increases lutein and zeaxanthin)<br>Summary risk of bias: not yet assessed                                                                                                                            |
| <b>Participants</b>  | Adults with age-related macular degeneration (AMD)<br>N: 20 LCn3 int., 20 control<br>Level of risk for CVD: low<br>Location: USA                                                                                                                                       |
| <b>Interventions</b> | Type: Supplements (capsules)<br>Comparison: LCn3 vs unclear placebo<br>Intervention: 1g/d LCn3 (650mg/d EPA, 350mg/d DHA)<br>Control: unclear placebo<br><b>PUFA Dose:</b> (intended) increase 0.5%E n-3, 0.5%E LCn3, 0.5%E PUFA<br>Duration of intervention: 6 months |
| <b>Outcomes</b>      | Main study outcome: serum levels of lutein, zeaxanthin and LC3<br>Available outcomes: visual acuity, adverse events (authors report no deaths occurred)<br>Response to contact: yes                                                                                    |

### Notes

### Risk of bias table

| Bias                                                      | Authors' judgement | Support for judgement |
|-----------------------------------------------------------|--------------------|-----------------------|
| Random sequence generation (selection bias)               | Unclear risk       |                       |
| Allocation concealment (selection bias)                   | Unclear risk       |                       |
| Blinding of participants and personnel (performance bias) | Unclear risk       |                       |
| Blinding of outcome assessment (detection bias)           | Unclear risk       |                       |
| Incomplete outcome data (attrition bias)                  | Unclear risk       |                       |
| Selective reporting (reporting bias)                      | Unclear risk       |                       |
| Other bias                                                | Unclear risk       |                       |

## Bairati 1992 <sup>6-11</sup>

|                      |                                                                                                                                                              |
|----------------------|--------------------------------------------------------------------------------------------------------------------------------------------------------------|
| <b>Methods</b>       | RCT, (EPA vs MUFA), 7 months<br>Summary risk of bias: partially assessed                                                                                     |
| <b>Participants</b>  | Patients undergoing first percutaneous transluminal coronary angioplasty (PTCA)<br>N: 59 int., 60 control<br>Level of risk for CVD: high<br>Location: Canada |
| <b>Interventions</b> | Type: supplementary capsules                                                                                                                                 |

Comparison: EPA vs MUFA

Intervention: 15g/d MaxEPA, including 2.7g/d EPA plus 1.8g/d DHA

Control: 15g/d olive oil

**PUFA Dose:** (intended) increase **2%E n-3, 2%E LCn3, 2%E PUFA**

Duration of intervention: 7 months

## Outcomes

Main study outcome: restenosis

Dropouts: 48 int, 38 control

Available outcomes: recurrent angina, BMI, lipids, BP, heart rate, side effects

Response to contact: yes

## Notes

### Risk of bias table

| Bias                                                      | Authors' judgement | Support for judgement                                                      |
|-----------------------------------------------------------|--------------------|----------------------------------------------------------------------------|
| Random sequence generation (selection bias)               | Unclear risk       | Randomisation: randomised using a randomisation table by an epidemiologist |
| Allocation concealment (selection bias)                   | Low risk           | Allocation concealment: Done                                               |
| Blinding of participants and personnel (performance bias) | Low risk           | Participants masked: yes<br>Providers masked: yes                          |
| Blinding of outcome assessment (detection bias)           | Low risk           | Outcome assessors masked: yes                                              |
| Incomplete outcome data (attrition bias)                  | Unclear risk       |                                                                            |
| Selective reporting (reporting bias)                      | Unclear risk       |                                                                            |
| Other bias                                                | Unclear risk       |                                                                            |

## Bellamy 1992 <sup>12</sup>

### Methods

RCT (EPA vs nil), 7 months

Summary risk of bias: partially assessed

### Participants

Patients undergoing coronary angioplasty

N: 60 int., 53 control

Level of risk for CVD: high

Location: UK

### Interventions

Type: supplementary capsules

Comparison: EPA vs nil

Intervention: MaxEPA, including 1.8g/d EPA plus 1.2g/d DHA

Control: nil

**PUFA Dose:** (intended) increase **1.4%E n-3, 1.4%E LCn3, 1.4%E PUFA**

Duration of intervention: 7 months

### Outcomes

Main study outcome: restenosis

Dropouts: 3 int., 7 control

Available outcomes: recurrent angina, repeat CABG or angioplasty, side effects

Response to contact: No

## Notes

### Risk of bias table

| Bias                                        | Authors' judgement | Support for judgement                      |
|---------------------------------------------|--------------------|--------------------------------------------|
| Random sequence generation (selection bias) | Unclear risk       | Randomisation: by random number allocation |

|                                                           |              |                                                           |
|-----------------------------------------------------------|--------------|-----------------------------------------------------------|
| Allocation concealment (selection bias)                   | Unclear risk | Allocation concealment: Unclear                           |
| Blinding of participants and personnel (performance bias) | Unclear risk | Participants masked: Unclear<br>Providers masked: Unclear |
| Blinding of outcome assessment (detection bias)           | Unclear risk | Outcome assessors masked: Unclear                         |
| Incomplete outcome data (attrition bias)                  | Unclear risk |                                                           |
| Selective reporting (reporting bias)                      | Unclear risk |                                                           |
| Other bias                                                | Unclear risk |                                                           |

## Bhargava 2015 <sup>13</sup>

|                      |                                                                                                                                                                                                                                                                                                                     |
|----------------------|---------------------------------------------------------------------------------------------------------------------------------------------------------------------------------------------------------------------------------------------------------------------------------------------------------------------|
| <b>Methods</b>       | RCT (LCn3 vs n6), 6 months<br>Summary risk of bias: not yet assessed                                                                                                                                                                                                                                                |
| <b>Participants</b>  | Contact lens wearers<br>N: 240 LCn3 int., 256 control<br>Level of risk for CVD: low<br>Location: India                                                                                                                                                                                                              |
| <b>Interventions</b> | Type: Supplement (capsules)<br>Comparison: LCn3 vs n6<br>Intervention: 4x300mg capsules/d including 720mgEPA + 480mgDHA (1.2mg/d LCn3)<br>Control: 4 capsules/d corn oil<br><b>PUFA Dose:</b> (intended) increase <b>0.5%E n-3, 0.5%E LCn3, unclear% n-6, unclear %E PUFA</b><br>Duration of intervention: 6 months |
| <b>Outcomes</b>      | Main study outcome: dry eye symptoms<br>Available outcomes: dry eye symptoms<br>Response to contact: not yet attempted                                                                                                                                                                                              |
| <b>Notes</b>         |                                                                                                                                                                                                                                                                                                                     |

### Risk of bias table

| Bias                                                      | Authors' judgement | Support for judgement |
|-----------------------------------------------------------|--------------------|-----------------------|
| Random sequence generation (selection bias)               | Unclear risk       |                       |
| Allocation concealment (selection bias)                   | Unclear risk       |                       |
| Blinding of participants and personnel (performance bias) | Unclear risk       |                       |
| Blinding of outcome assessment (detection bias)           | Unclear risk       |                       |
| Incomplete outcome data (attrition bias)                  | Unclear risk       |                       |
| Selective reporting (reporting bias)                      | Unclear risk       |                       |
| Other bias                                                | Unclear risk       |                       |

## Bhargava 2016 <sup>14</sup>

|                |                                                                        |
|----------------|------------------------------------------------------------------------|
| <b>Methods</b> | RCT (LCn3 vs MUFA), 6 months<br>Summary risk of bias: not yet assessed |
|----------------|------------------------------------------------------------------------|

**Participants** People with rosacea and dry eye symptoms  
N: 65 LCn3 int., 65 MUFA control  
Level of risk for CVD: low  
Location: India

**Interventions** Type: Supplement (capsules)  
Comparison: LCn3 vs MUFA  
Intervention: 4x300mg capsules/d including 720mgEPA + 480mgDHA (1.2mg/d LCn3)  
Control: 4 capsules/d olive oil  
**PUFA Dose:** (intended) increase **0.5%E n-3, 0.5%E LCn3, unclear% n-6, 0.5%E PUFA**  
Duration of intervention: 6 months

**Outcomes** Main study outcome: eye outcomes  
Available outcomes: dry eye symptoms, tearfilm breakup time, meibomian gland score, Schirmer test  
Response to contact: not yet attempted

**Notes**

#### Risk of bias table

| Bias                                                      | Authors' judgement | Support for judgement |
|-----------------------------------------------------------|--------------------|-----------------------|
| Random sequence generation (selection bias)               | Unclear risk       |                       |
| Allocation concealment (selection bias)                   | Unclear risk       |                       |
| Blinding of participants and personnel (performance bias) | Unclear risk       |                       |
| Blinding of outcome assessment (detection bias)           | Unclear risk       |                       |
| Incomplete outcome data (attrition bias)                  | Unclear risk       |                       |
| Selective reporting (reporting bias)                      | Unclear risk       |                       |
| Other bias                                                | Unclear risk       |                       |

#### Bianconi 2011 <sup>15</sup>

**Methods** 2 arm, parallel, RCT, 6mo  
Summary risk of bias: Medium to high

**Participants** People with persistent Atrial Fibrillation  
N: control: 103, int: 111  
Level of risk for CVD: High  
Male: 70.5% int., 67.4% control  
Mean age, sd: 69.3, 8.0. int., 69.2, 7.8 control  
Age range: no data available  
Smokers: no data available  
Hypertension: 73.7% int., 69.6% control  
Location: Italy

**Interventions** Type: supplement (capsule) Intervention: Società Prodotti Antibiotici, Milan, 3 x 1g capsule/day until ECV (7 days) and 2 x 1g capsule thereafter (9.27mg/d EPA and 7.73mg/d DHA).  
Control: 3 x 1g capsule/day olive oil until ECV and 2 x 1g thereafter.  
Compliance: Capsule count. >80% of capsules taken by 93.7% int., 93.5% control.  
Plasma EPA int., 1.05 (0.44) 1 month, 1.18 (0.56) 3 months; control, 0.42 (0.2) 1 month, 0.42 (0.21) 3 months. Plasma DHA int., 0.69 (0.20) 1 month, 0.81 (0.25) 3 months; control, 1.31 (0.63) 1 month, 1.287 (0.62) 3 months.  
Duration of intervention: 6mo

**Outcomes** Main study outcome: Atrial fibrillation reoccurrence  
 Dropouts: Control: 11 (3-discontinued before ECV, 4-discontinued after ECV, 4-failed second ECV), Int., 16 (7-discontinued before ECV, 6-discontinued after ECV, 3-failed second ECV).  
 Available outcomes: heart failure, non-fatal arrhythmias, cardiovascular events.  
 Response to contact: not yet attempted

**Notes**

**Risk of bias table**

| Bias                                                      | Authors' judgement | Support for judgement                                                              |
|-----------------------------------------------------------|--------------------|------------------------------------------------------------------------------------|
| Random sequence generation (selection bias)               | Low risk           | Computer generated randomization list, using blocks of six. Double blind.          |
| Allocation concealment (selection bias)                   | Unclear risk       | Method of allocation unclear.                                                      |
| Blinding of participants and personnel (performance bias) | Low risk           | "assignment fully blinded", placebo capsules of identical size, colour and weight. |
| Blinding of outcome assessment (detection bias)           | Unclear risk       | unclear                                                                            |
| Incomplete outcome data (attrition bias)                  | Low risk           | Attritions and exclusions were well described.                                     |
| Selective reporting (reporting bias)                      | Unclear risk       | Trial not registered. Recruitment began in July 2006.                              |
| Other bias                                                | Low risk           | No further bias noted                                                              |

**Bierenbaum 1963 <sup>16</sup>**

**Methods** RCT (total PUFA vs usual fat), 11.5 months  
 Summary risk of bias: not yet assessed

**Participants** Men who had had a myocardial infarction  
 N: 53 int., 46 control  
 Level of risk for CVD: high  
 Location: USA

**Interventions** Type: Dietary advice  
 Comparison: total PUFA vs usual fat  
 Intervention: 14.1%E PUFA, 27.8%E total fat, 5.5% SFA, 9.3%E MUFA, 20.4% protein, 51.8%E CHO  
 Control: 3.3%E PUFA, 28.2%E total fat, 9.6% SFA, 13.2%E MUFA, 20.7% protein, 51.1%E CHO  
**PUFA Dose:** (intended) increase **10.8%E PUFA**  
 Duration of intervention: 50 weeks

**Outcomes** Main study outcome: cholesterol  
 Available outcomes: lipids, adiposity  
 Response to contact: not yet attempted

**Notes**

**Risk of bias table**

| Bias                                        | Authors' judgement | Support for judgement |
|---------------------------------------------|--------------------|-----------------------|
| Random sequence generation (selection bias) | Unclear risk       |                       |
| Allocation concealment (selection bias)     | Unclear risk       |                       |

|                                                           |              |
|-----------------------------------------------------------|--------------|
| Blinding of participants and personnel (performance bias) | Unclear risk |
| Blinding of outcome assessment (detection bias)           | Unclear risk |
| Incomplete outcome data (attrition bias)                  | Unclear risk |
| Selective reporting (reporting bias)                      | Unclear risk |
| Other bias                                                | Unclear risk |

## Blommers 2002 <sup>17 18</sup>

|                      |                                                                                                                                                                                                                                                                                                                                                                                                                                                                                                                                                                                                                                                                                                                                                                                                                                                     |
|----------------------|-----------------------------------------------------------------------------------------------------------------------------------------------------------------------------------------------------------------------------------------------------------------------------------------------------------------------------------------------------------------------------------------------------------------------------------------------------------------------------------------------------------------------------------------------------------------------------------------------------------------------------------------------------------------------------------------------------------------------------------------------------------------------------------------------------------------------------------------------------|
| <b>Methods</b>       | RCT, 4 arms, 2x2 (total PUFA [LCn3 + n6] vs LCn3 vs n6), 6 months<br>Summary risk of bias: not yet assessed                                                                                                                                                                                                                                                                                                                                                                                                                                                                                                                                                                                                                                                                                                                                         |
| <b>Participants</b>  | Women with severe chronic mastalgia<br>N: 30 total PUFA int, 30 LCn3 int., 60 n6 (including 30 GLA, 30 n6 corn oil)<br>Level of risk for CVD: low<br>Location: the Netherlands                                                                                                                                                                                                                                                                                                                                                                                                                                                                                                                                                                                                                                                                      |
| <b>Interventions</b> | Type: Supplement (capsules)<br>Comparison: total PUFA vs LCn3 vs n6<br>Intervention: LCn3 FC: 3g/d fish oil (38% EPA or 1.14g/d EPA, 24%DHA or 0.72g/d DHA), 1.86g/d LCn3, <b>0.8%E LCn3</b> plus 3g/d corn oil (60%LA), 1.8g/d n6 or <b>0.8%E n6</b><br>total PUFA EF: 3g/d fish oil (1.86g/d LCn3) and 3g/d evening primrose oil (9.6% GLA or 0.29g/d GLA + 71.2% LA or 2.14g/d LA, total 2.43g/d n6), total 4.3g/d total PUFA, <b>1.9%E total PUFA</b><br>Control EC: EPO: 3g/d evening primrose oil (9.6% GLA or 0.29g/d GLA + 71.2% LA or 2.14g/d LA, total 2.43g/d n6) and total 4.14g/d n6, <b>1.9%E n6</b><br>Control CC: 3g/d corn oil (60%LA), 1.8g/d n6 or 0.8%E n6 and 3g/d wheat germ oil (57%LA), 1.7g/d n6, total 3.5g/d n6, <b>1.6%E n6</b><br><b>PUFA Dose:</b> (intended) increase as above<br>Duration of intervention: 6 months |
| <b>Outcomes</b>      | Main study outcome: % of days with breast pain<br>Available outcomes: side effects (gastric, abdominal, skin) and body weight, % of pain days, severity of pain (authors reported no deaths or CVD events)<br>Response to contact: yes                                                                                                                                                                                                                                                                                                                                                                                                                                                                                                                                                                                                              |

### Notes

### Risk of bias table

| Bias                                                      | Authors' judgement | Support for judgement |
|-----------------------------------------------------------|--------------------|-----------------------|
| Random sequence generation (selection bias)               | Unclear risk       |                       |
| Allocation concealment (selection bias)                   | Unclear risk       |                       |
| Blinding of participants and personnel (performance bias) | Unclear risk       |                       |
| Blinding of outcome assessment (detection bias)           | Unclear risk       |                       |
| Incomplete outcome data (attrition bias)                  | Unclear risk       |                       |
| Selective reporting (reporting bias)                      | Unclear risk       |                       |
| Other bias                                                | Unclear risk       |                       |

## Borchgrevink 1966 <sup>19-21</sup>

|                      |                                                                                                                                                                                                                                                                                                                                                      |
|----------------------|------------------------------------------------------------------------------------------------------------------------------------------------------------------------------------------------------------------------------------------------------------------------------------------------------------------------------------------------------|
| <b>Methods</b>       | RCT (ALA vs omega-6), 10 months<br>Summary risk of bias: low                                                                                                                                                                                                                                                                                         |
| <b>Participants</b>  | Men with impending or recent myocardial infarction (MI)<br>N: 100 int., 100 control<br>Level of risk for CVD: High (men with impending or recent myocardial infarction)<br>Male: 100%<br>Mean age, sd: 57.3 int., 57.4 control<br>Age range: all <70 yrs<br>Smokers: 77% int., 85% control<br>Hypertension: 7% int., 10% control<br>Location: Norway |
| <b>Interventions</b> | Type: supplement (oil)<br>Intervention: linseed oil 10 ml/d initially, later raised to 20 or 30 ml/d (4.5g/d a-lin, later 9 or 13.5 g/d)<br>Control: corn oil, 10 ml/d initially, later raised to 20 or 30 ml/d<br>Compliance: bottle counts, no data presented<br>Length of intervention: mean 10 (range 3-16) mo                                   |
| <b>Outcomes</b>      | Main study outcome: CV events<br>Dropouts: unclear<br>Available outcomes: total and cardiovascular deaths, MI, stroke, heart failure, combined CV events, lipids, adverse events<br>Response to contact: Yes                                                                                                                                         |
| <b>Notes</b>         | Both groups were advised to cut out fried foods and other oils, and avoid margarine containing linolenic acids                                                                                                                                                                                                                                       |

### Risk of bias table

| Bias                                                      | Authors' judgement | Support for judgement                                                                                                                                                                                   |
|-----------------------------------------------------------|--------------------|---------------------------------------------------------------------------------------------------------------------------------------------------------------------------------------------------------|
| Random sequence generation (selection bias)               | Low risk           | Statistical office at the hospital performed block randomisation on a pre-constructed list. Randomisation was carried out by the statistical office from a list with block randomisation (blocks of 20) |
| Allocation concealment (selection bias)                   | Low risk           | As above                                                                                                                                                                                                |
| Blinding of participants and personnel (performance bias) | Low risk           | Participants masked: Yes. Providers masked: Yes                                                                                                                                                         |
| Blinding of outcome assessment (detection bias)           | Low risk           | Outcome assessors masked: Yes                                                                                                                                                                           |
| Incomplete outcome data (attrition bias)                  | Unclear risk       | Mortality is well described, but unclear how many participants dropped out overall                                                                                                                      |
| Selective reporting (reporting bias)                      | Unclear risk       | No study protocol was found                                                                                                                                                                             |
| Other bias                                                | Low risk           | No further bias noted                                                                                                                                                                                   |

## CART - Johansen 1999 <sup>22-24</sup>

|                     |                                                                                                                                                                                      |
|---------------------|--------------------------------------------------------------------------------------------------------------------------------------------------------------------------------------|
| <b>Methods</b>      | RCT (LCn3 vs n6), 6.5 months<br>Summary risk of bias: medium or high                                                                                                                 |
| <b>Participants</b> | Patients having elective PTCA<br>N: 250 int., 250 control<br>Level of risk for CVD: High (people about to undergo elective coronary angioplasty)<br>Male: 74.5% int., 80.7 % control |



|                      |                                                                                                                                                                                                                                                                                                                                               |
|----------------------|-----------------------------------------------------------------------------------------------------------------------------------------------------------------------------------------------------------------------------------------------------------------------------------------------------------------------------------------------|
|                      | Mean age, sd: 60.3, 9.3 int., 59.1, 9.3 control<br>Age range: Unclear<br>Smokers: 16.3% int., 22.4% control<br>Hypertension: 34.2% int., 33.9% control<br>Location: Norway                                                                                                                                                                    |
| <b>Interventions</b> | Type: supplement (capsule)<br>Intervention: Omacor capsules, 6/d (5g EPA + DHA daily)<br>Control: corn oil capsules, 6/d Compliance: capsule count (results not reported), serum EPA + DHA rose in the intervention group (185 to 267 mg/L at 6 mo) and fell in the control group (172 to 155 mg/L at 6 mo)<br>Length of intervention: 6.5 mo |
| <b>Outcomes</b>      | Main study outcome: restenosis<br>Dropouts: 54 int., 58 control<br>Available outcomes: total and CV deaths, lipids, side effects<br>Response to contact: No                                                                                                                                                                                   |
| <b>Notes</b>         | Those using fish oil capsules at baseline were asked to stop.                                                                                                                                                                                                                                                                                 |

### Risk of bias table

| Bias                                                      | Authors' judgement | Support for judgement                                                                                       |
|-----------------------------------------------------------|--------------------|-------------------------------------------------------------------------------------------------------------|
| Random sequence generation (selection bias)               | Unclear risk       | Consecutively numbered sealed envelopes mentioned, but not method of including allocations in the envelopes |
| Allocation concealment (selection bias)                   | Unclear risk       | Envelopes not stated as opaque                                                                              |
| Blinding of participants and personnel (performance bias) | Low risk           | Participants masked: Yes<br>Providers masked: Yes                                                           |
| Blinding of outcome assessment (detection bias)           | Low risk           | Outcome assessors masked: Yes                                                                               |
| Incomplete outcome data (attrition bias)                  | Low risk           | Well described                                                                                              |
| Selective reporting (reporting bias)                      | Unclear risk       | No study protocol was found                                                                                 |
| Other bias                                                | Low risk           | No further bias noted                                                                                       |

### Chen 2008 <sup>25</sup>

|                      |                                                                                                                                                                                                                                                                                                                                                      |
|----------------------|------------------------------------------------------------------------------------------------------------------------------------------------------------------------------------------------------------------------------------------------------------------------------------------------------------------------------------------------------|
| <b>Methods</b>       | RCT (high dose n3 vs low dose LCn3 vs unspecified placebo), 6 months<br>Summary risk of bias: not yet assessed                                                                                                                                                                                                                                       |
| <b>Participants</b>  | People with non-alcoholic fatty liver disease (NAFLD)<br>N: 15 high n3 int., 15 low dose n3, 16 control<br>Level of risk for CVD: low<br>Location: China                                                                                                                                                                                             |
| <b>Interventions</b> | Type: Supplement (capsules)<br>Comparison: high dose n3 vs low dose LCn3 vs unspecified placebo<br>Intervention: high dose n3 (no further details of dose or n3 type) vs low dose n3<br>Control: unspecified placebo<br><b>PUFA Dose:</b> (intended) increase unclear %E n-3, unclear %E LCn3, unclear %E PUFA<br>Duration of intervention: 24 weeks |
| <b>Outcomes</b>      | Main study outcome: extent of NAFLD<br>Available outcomes: ultrasound assessment, lipids, liver function tests<br>Response to contact: not yet attempted                                                                                                                                                                                             |
| <b>Notes</b>         | Notes: paper in Chinese, information only taken from the abstract and figures                                                                                                                                                                                                                                                                        |

## Risk of bias table

| Bias                                                      | Authors' judgement | Support for judgement |
|-----------------------------------------------------------|--------------------|-----------------------|
| Random sequence generation (selection bias)               | Unclear risk       |                       |
| Allocation concealment (selection bias)                   | Unclear risk       |                       |
| Blinding of participants and personnel (performance bias) | Unclear risk       |                       |
| Blinding of outcome assessment (detection bias)           | Unclear risk       |                       |
| Incomplete outcome data (attrition bias)                  | Unclear risk       |                       |
| Selective reporting (reporting bias)                      | Unclear risk       |                       |
| Other bias                                                | Unclear risk       |                       |

## CHOICE - Peters 2014 <sup>26</sup>

|                      |                                                                                                                                                                                                                                                                                                                                                                                                                  |
|----------------------|------------------------------------------------------------------------------------------------------------------------------------------------------------------------------------------------------------------------------------------------------------------------------------------------------------------------------------------------------------------------------------------------------------------|
| <b>Methods</b>       | RCT, 3 arms (ALA vs nil), 12 months<br>Summary risk of bias: not yet assessed                                                                                                                                                                                                                                                                                                                                    |
| <b>Participants</b>  | Healthy postmenopausal women<br>N: 37 ALA int., 39 control (also 40 in another arm)<br>Level of risk for CVD: low<br>Location: USA                                                                                                                                                                                                                                                                               |
| <b>Interventions</b> | Type: Supplement of ground flax seed<br>Comparison: ALA vs nil<br>Intervention: Flax Plus - moderate fat diet (as in control) plus 10g/d ground flax seed<br>Control: Food Power - moderate fat diet. AHA type diet where foods high in saturated fat were replaced by lower fat foods<br><b>PUFA Dose:</b> (intended) increase unclear %E n-3, 0%E LCn3, unclear %E PUFA<br>Duration of intervention: 12 months |
| <b>Outcomes</b>      | Main study outcome: adherence to dietary plans<br>Available outcomes: body weight, attitudes<br>Response to contact: not yet attempted                                                                                                                                                                                                                                                                           |
| <b>Notes</b>         | Note: 3rd arm was called Whole Foods - macrobiotic whole food diet, predominantly vegetarian, high in phytoestrogens. In the published paper Whole Foods were compared with both moderate fat arms (combined), so no useful outcome data were reported.                                                                                                                                                          |

## Risk of bias table

| Bias                                                      | Authors' judgement | Support for judgement |
|-----------------------------------------------------------|--------------------|-----------------------|
| Random sequence generation (selection bias)               | Unclear risk       |                       |
| Allocation concealment (selection bias)                   | Unclear risk       |                       |
| Blinding of participants and personnel (performance bias) | Unclear risk       |                       |
| Blinding of outcome assessment (detection bias)           | Unclear risk       |                       |
| Incomplete outcome data (attrition bias)                  | Unclear risk       |                       |

|                                      |              |
|--------------------------------------|--------------|
| Selective reporting (reporting bias) | Unclear risk |
| Other bias                           | Unclear risk |

## Chrysohoou 2016 <sup>27 28</sup>

|                      |                                                                                                                                                                                                                                                                                                                                                                                                                                                    |
|----------------------|----------------------------------------------------------------------------------------------------------------------------------------------------------------------------------------------------------------------------------------------------------------------------------------------------------------------------------------------------------------------------------------------------------------------------------------------------|
| <b>Methods</b>       | RCT (n3 vs nil), 6 months<br>Summary risk of bias: moderate to high                                                                                                                                                                                                                                                                                                                                                                                |
| <b>Participants</b>  | People with chronic compensated heart failure<br>N: 101 or 104 n3 int., 104 or 101 control<br>Level of risk for CVD: high<br>Location: Greece                                                                                                                                                                                                                                                                                                      |
| <b>Interventions</b> | Type: Supplement (capsules)<br>Comparison: n3 vs nil<br>Intervention: 1g/d n3 (no type or source given)<br>Control: nil (no placebo)<br><b>PUFA Dose:</b> (intended) increase unclear %E n-3, unclear %E LCn3, unclear %E PUFA<br>Duration of intervention: 6 months                                                                                                                                                                               |
| <b>Outcomes</b>      | Main study outcome: ventricular function<br>Available outcomes: BNP, weight, BMI, heart rate, white blood cell count, uric acid, proteins, albumin, U&Es, lipids, CRP, platelet count, echographic assessments (including ejection fractions, atrial volume, etc), depression (Zung's Depression Rating Scale, ZDRS), adverse events<br>Response to contact: yes (confirmed 6 month duration of supplementation, but did not provide further data) |

### Notes

### Risk of bias table

| Bias                                                      | Authors' judgement | Support for judgement         |
|-----------------------------------------------------------|--------------------|-------------------------------|
| Random sequence generation (selection bias)               | Unclear risk       |                               |
| Allocation concealment (selection bias)                   | Unclear risk       |                               |
| Blinding of participants and personnel (performance bias) | High risk          | No placebo used, so unblinded |
| Blinding of outcome assessment (detection bias)           | Unclear risk       |                               |
| Incomplete outcome data (attrition bias)                  | Unclear risk       |                               |
| Selective reporting (reporting bias)                      | Unclear risk       |                               |
| Other bias                                                | Unclear risk       |                               |

## Cod-Fish - Thomashow 2014 <sup>29</sup>

|                      |                                                                                                                                        |
|----------------------|----------------------------------------------------------------------------------------------------------------------------------------|
| <b>Methods</b>       | RCT (unclear n3 vs unclear placebo), 6 months<br>Summary risk of bias: not yet assessed                                                |
| <b>Participants</b>  | People with chronic obstructive pulmonary disease (COPD)<br>N: ~20 n3 int., ~20 control<br>Level of risk for CVD: low<br>Location: USA |
| <b>Interventions</b> | Type: Supplement (capsules?)                                                                                                           |

Comparison: unclear n3 vs unclear placebo

Intervention: 3g/d n3

Control: unclear placebo

**PUFA Dose:** (intended) increase 1%.4E n-3, unclear %E LCn3, unclear %E PUFA

Duration of intervention: 6 months

**Outcomes** Main study outcome: flow-mediated dilatation of brachial artery  
Available outcomes: peripheral arterial tonometry, CD31+, CD62E+, endothelial microparticles, pulmonary function, 6 minute walk test, oxygen saturation, respiratory questionnaire

Response to contact: not yet attempted

**Notes** Note: abstract only

#### Risk of bias table

| Bias                                                      | Authors' judgement | Support for judgement |
|-----------------------------------------------------------|--------------------|-----------------------|
| Random sequence generation (selection bias)               | Unclear risk       |                       |
| Allocation concealment (selection bias)                   | Unclear risk       |                       |
| Blinding of participants and personnel (performance bias) | Unclear risk       |                       |
| Blinding of outcome assessment (detection bias)           | Unclear risk       |                       |
| Incomplete outcome data (attrition bias)                  | Unclear risk       |                       |
| Selective reporting (reporting bias)                      | Unclear risk       |                       |
| Other bias                                                | Unclear risk       |                       |

#### Colli 2012 <sup>30</sup>

**Methods** RCT (ALA vs protein placebo), 6 months  
Summary risk of bias: not yet assessed

**Participants** Women with menopausal symptoms  
N: 28 flaxseed extract int., 22 flaxseed meal int, 25 collagen placebo  
Level of risk for CVD: low  
Location: Brazil

**Interventions** Type: Supplement (capsules) for flaxseed extract and collagen placebo, flaxseed meal is food supplement  
Comparison: ALA vs protein  
Intervention: extract - 1g/d flaxseed extract (2x500mg capsules)  
meal - 90g/d flaxseed meal, 2x45g,  
Control: 1g/d collagen (2x500mg capsules)  
**PUFA Dose:** (intended) increase unclear %E n-3, 0 %E LCn3, unclear %E PUFA  
Duration of intervention: 6 months

**Outcomes** Main study outcome: menopausal symptoms (Kupperman index)  
Available outcomes: intensity of hot flashes, menopausal symptoms, vaginal epithelial maturation value, endometrial thickness, estradiol, FSH, body weight  
Response to contact: not yet attempted

**Notes**

#### Risk of bias table

| Bias | Authors' judgement | Support for judgement |
|------|--------------------|-----------------------|
|------|--------------------|-----------------------|

|                                                           |              |
|-----------------------------------------------------------|--------------|
| Random sequence generation (selection bias)               | Unclear risk |
| Allocation concealment (selection bias)                   | Unclear risk |
| Blinding of participants and personnel (performance bias) | Unclear risk |
| Blinding of outcome assessment (detection bias)           | Unclear risk |
| Incomplete outcome data (attrition bias)                  | Unclear risk |
| Selective reporting (reporting bias)                      | Unclear risk |
| Other bias                                                | Unclear risk |

## DREAM 2018 - NCT02128763 <sup>31 32</sup>

|                      |                                                                                                                                                                                                                                                                                                                                                                                                                                                                                                                                                                 |
|----------------------|-----------------------------------------------------------------------------------------------------------------------------------------------------------------------------------------------------------------------------------------------------------------------------------------------------------------------------------------------------------------------------------------------------------------------------------------------------------------------------------------------------------------------------------------------------------------|
| <b>Methods</b>       | RCT 2 arms, (LCn3 vs MUFA), 12 months<br>Summary risk of bias: not yet assessed                                                                                                                                                                                                                                                                                                                                                                                                                                                                                 |
| <b>Participants</b>  | People with moderate to severe dry eye disease<br>N: 349 LCn3 int., 186 control (of whom 329 and 170 were analysed)<br>Level of risk for CVD: low<br>Location: USA                                                                                                                                                                                                                                                                                                                                                                                              |
| <b>Interventions</b> | Type: Supplements (capsules)<br>Comparison: LCn3 vs MUFA<br>Intervention: 3g/d LCn3 from 5 soft gel capsules/d, 2g/d EPA plus 1g/d DHA, TG form<br>Control: 5mg/d olive oil placebo from 5 soft gel capsules/d, 68% oleic acid (3.4g/d oleic acid), 11% LA, 0.55mg/d LA (both types of capsule contained 3mg vit E/capsule plus lemon and masking flavour). Access Business Group manufactured and donated all capsules.<br><b>PUFA Dose:</b> (planned) increase <b>1.4%E n-3, 1.4%E LCn3, unclear % n-6, 1.4%E PUFA</b><br>Duration of intervention: 12 months |
| <b>Outcomes</b>      | Main study outcome: Ocular surface disease index (OSDI)<br>Available outcomes: variety of eye outcomes, physical and mental health subscales of SF-36, adverse events, red cell fatty acids                                                                                                                                                                                                                                                                                                                                                                     |
| <b>Notes</b>         | NCT02128763                                                                                                                                                                                                                                                                                                                                                                                                                                                                                                                                                     |

### Risk of bias table

| Bias                                                      | Authors' judgement | Support for judgement |
|-----------------------------------------------------------|--------------------|-----------------------|
| Random sequence generation (selection bias)               | Unclear risk       |                       |
| Allocation concealment (selection bias)                   | Unclear risk       |                       |
| Blinding of participants and personnel (performance bias) | Unclear risk       |                       |
| Blinding of outcome assessment (detection bias)           | Unclear risk       |                       |
| Incomplete outcome data (attrition bias)                  | Unclear risk       |                       |
| Selective reporting (reporting bias)                      | Unclear risk       |                       |
| Other bias                                                | Unclear risk       |                       |

## Dry 1991 <sup>33 34</sup>

**Methods** RCT (LCn3 vs unclear placebo) 12 months  
Summary risk of bias: low

**Participants** People with asthma  
N: 6 int., 6 control  
Level of risk for CVD: Low  
Male: Unclear  
Mean age, sd: Unclear  
Age range: Unclear  
Smokers: Unclear  
Hypertension: Unclear  
Location: France

**Interventions** Type: supplement (capsule?)  
Intervention: Liparmonyl (1g/d EPA + DHA)  
Control: 'placebo', no further details  
Compliance: capsule count (results not reported)  
Length of intervention: 12 mo

**Outcomes** Main study outcome: pulmonary function  
Dropouts: none  
Available outcomes: deaths  
Response to contact: Yes

### Notes

#### Risk of bias table

| Bias                                                      | Authors' judgement | Support for judgement                             |
|-----------------------------------------------------------|--------------------|---------------------------------------------------|
| Random sequence generation (selection bias)               | Low risk           | randomised in blocks of 4                         |
| Allocation concealment (selection bias)                   | Low risk           | Adequate                                          |
| Blinding of participants and personnel (performance bias) | Low risk           | Participants masked: Yes<br>Providers masked: Yes |
| Blinding of outcome assessment (detection bias)           | Low risk           | Outcome assessors masked: Yes                     |
| Incomplete outcome data (attrition bias)                  | Unclear risk       |                                                   |
| Selective reporting (reporting bias)                      | Unclear risk       |                                                   |
| Other bias                                                | Unclear risk       |                                                   |

## Duffy 2004 <sup>35</sup>

**Methods** RCT 2x2 (LCn3 vs MUFA), 6 months (also copper vs not)  
Summary risk of bias: not yet assessed

**Participants** People with systemic lupus erythematosus (SLE)  
N: 27 LCn3 int., 25 placebo  
Level of risk for CVD: low  
Location: UK

**Interventions** Type: Supplement (capsules)  
Comparison: LCn3 vs MUFA  
Intervention: 3g/d fish oil (MaxEPA), 3x1g capsules, (18% EPA or 0.54g/d, 12% DHA or

0.36g/d DHA), 0.9g/d LCn3, 0.4%E LCn3

Control: 3g/d olive oil, 3x1g capsules with peppermint oil

**PUFA Dose:** (intended) increase 0.4%E n-3, 0.4 %E LCn3, 0.4 %E PUFA

Duration of intervention: 6 months

**Outcomes** Main study outcome: disease activity in SLE  
Available outcomes: disease activity, blood pressure, BMI, antibodies (dsDNA, IgG, IgM, complement factors 3 & 4), haemoglobin, white cell count, platelets, ESR, U&Es, total protein, patient reported outcomes  
Response to contact: not yet attempted

## Notes

### Risk of bias table

| Bias                                                      | Authors' judgement | Support for judgement |
|-----------------------------------------------------------|--------------------|-----------------------|
| Random sequence generation (selection bias)               | Unclear risk       |                       |
| Allocation concealment (selection bias)                   | Unclear risk       |                       |
| Blinding of participants and personnel (performance bias) | Unclear risk       |                       |
| Blinding of outcome assessment (detection bias)           | Unclear risk       |                       |
| Incomplete outcome data (attrition bias)                  | Unclear risk       |                       |
| Selective reporting (reporting bias)                      | Unclear risk       |                       |
| Other bias                                                | Unclear risk       |                       |

## El Khouli 2014 <sup>36</sup>

**Methods** RCT (LCn3 vs unspecified placebo), 6 months  
Summary risk of bias: not yet assessed

**Participants** People with recurrent aphthous stomatitis  
N: 25 n3 int., 25 control  
Level of risk for CVD: low  
Location: Egypt

**Interventions** Type: Supplement (capsules)  
Comparison: LCn3 vs unspecified placebo  
Intervention: 3x n3 soft gelatine capsules/d (including 300mg EPA and 200mg DHA per capsule), 0.9g/d EPA plus 0.6g/d DHA, 1.5g/d LCn3  
Control: 3x soft gelatine capsules/d of unspecified placebo  
**PUFA Dose:** (intended) increase 0.7%E n-3, 0.7 %E LCn3, 0.7%E PUFA  
Duration of intervention: 6 months

**Outcomes** Main study outcome: stomatitis symptoms  
Available outcomes: number of ulcers, ulcer duration, pain, adverse events, oral-health related quality of life  
Response to contact: not yet attempted

## Notes

### Risk of bias table

| Bias                                        | Authors' judgement | Support for judgement |
|---------------------------------------------|--------------------|-----------------------|
| Random sequence generation (selection bias) | Unclear risk       |                       |

|                                                           |              |
|-----------------------------------------------------------|--------------|
| Allocation concealment (selection bias)                   | Unclear risk |
| Blinding of participants and personnel (performance bias) | Unclear risk |
| Blinding of outcome assessment (detection bias)           | Unclear risk |
| Incomplete outcome data (attrition bias)                  | Unclear risk |
| Selective reporting (reporting bias)                      | Unclear risk |
| Other bias                                                | Unclear risk |

## ESPRIT - Maresta 2002 <sup>37 38</sup>

|                      |                                                                                                                                                                                                                                                                                                                                                                 |
|----------------------|-----------------------------------------------------------------------------------------------------------------------------------------------------------------------------------------------------------------------------------------------------------------------------------------------------------------------------------------------------------------|
| <b>Methods</b>       | RCT (LCn3 vs MUFA), 7 months<br>Summary risk of bias: low                                                                                                                                                                                                                                                                                                       |
| <b>Participants</b>  | Italians needing PTCA<br>N:169 int., 170 control<br>Level of risk for CVD: high (undergoing planned PTCA)<br>Male: 86% int., 83% control<br>Mean age, sd: 58.9, 9.5 int, 58.6, 8.7 control<br>Age range: Unclear<br>Smokers: 23% int., 21% control<br>Hypertension: 47% int., 34% control<br>Location: Italy                                                    |
| <b>Interventions</b> | Type: supplement (capsule)<br>Intervention: Esapent capsules, 6/d for 2 mo, then 3/d (5.1g/d EPA + DHA initially, later 2.6g/d)<br>Control: identical olive oil capsules, 6/d for 2 mo, then 3/d<br>Compliance: plasma fatty acids used to assess, 13.7% of int. group did not adhere strictly to Esapent (no info on controls)<br>Length of intervention: 7 mo |
| <b>Outcomes</b>      | Main study outcome: restenosis<br>Dropouts: 44 int, 38 control<br>Available outcomes: total MI, significant angina, combined CV events, thrombo-embolism, TGs, side effects<br>Response to contact: yes                                                                                                                                                         |
| <b>Notes</b>         | Study states that 3 participants experienced a sudden death, but numbers were not provided by study arm                                                                                                                                                                                                                                                         |

### Risk of bias table

| Bias                                                      | Authors' judgement | Support for judgement                                                                    |
|-----------------------------------------------------------|--------------------|------------------------------------------------------------------------------------------|
| Random sequence generation (selection bias)               | Low risk           | "central randomisation stratified by center, performed by Pharmacia Upjohn"              |
| Allocation concealment (selection bias)                   | Unclear risk       | Unclear whether the randomisation list was produced and used before or after recruitment |
| Blinding of participants and personnel (performance bias) | Unclear risk       | unclear                                                                                  |
| Blinding of outcome assessment (detection bias)           | Unclear risk       | unclear                                                                                  |
| Incomplete outcome data (attrition bias)                  | Unclear risk       | Numbers of dropouts and reasons provided, but not by study arm                           |
| Selective reporting (reporting bias)                      | Unclear risk       | No protocol found                                                                        |



Other bias

Low risk

No further bias noted

## FORCE - Harper 2006 <sup>39 40</sup>

**Methods** RCT (ALA vs MUFA), 6 months  
Summary risk of bias: not yet assessed

**Participants** People with coronary heart disease  
N: 31 ALA int., 25 MUFA control  
Level of risk for CVD: high  
Location: USA

**Interventions** Type: Supplement (capsules)  
Comparison: ALA vs MUFA  
Intervention: Flaxseed oil 5.2g/d, 3g/d ALA as capsules (RxVitamins)  
Control: Olive oil 5.2g/d  
**PUFA Dose:** (intended) increase **1.4%E n-3, 0%E LCn3, 1.4%E PUFA**  
Duration of intervention: 26 weeks

**Outcomes** Main study outcome: lipids  
Available outcomes: lipoproteins and lipoprotein subfractions  
Response to contact: no reply

**Notes**

### Risk of bias table

| Bias                                                      | Authors' judgement | Support for judgement |
|-----------------------------------------------------------|--------------------|-----------------------|
| Random sequence generation (selection bias)               | Unclear risk       |                       |
| Allocation concealment (selection bias)                   | Unclear risk       |                       |
| Blinding of participants and personnel (performance bias) | Unclear risk       |                       |
| Blinding of outcome assessment (detection bias)           | Unclear risk       |                       |
| Incomplete outcome data (attrition bias)                  | Unclear risk       |                       |
| Selective reporting (reporting bias)                      | Unclear risk       |                       |
| Other bias                                                | Unclear risk       |                       |

## FORT - Leaf 1994 – NCT00000473 <sup>41-43</sup>

**Methods** RCT (LCn3 vs n6), 6 months  
Summary risk of bias: low

**Participants** People undergoing angioplasty  
N: 275 int., 276 control  
Level of risk for CVD: High  
Male: 77% int., 81% control  
Mean age, sd: Unclear  
Age range: 30->70 int., 30->70 control  
Smokers: 14% int., 19% control  
Hypertension: 47% int., 37% control  
Location: USA

**Interventions** Type: supplement (capsule)  
Intervention: fish oil concentrate capsules 10x1 g/d (6.9g/d EPA + DHA)  
Control: corn oil capsules 10x1 g/d with 0.4% fish oil to maintain blinding (0.003g/d EPA +

DHA)

Compliance: plasma EPA + DHA rose by 8.5% total fatty acids to 6 mo in int., by 0.6% in controls

Length of intervention: 6 mo

**Outcomes** Main study outcome: restenosis

Dropouts: 69 int., 69 control

Available outcomes: deaths, combined cardiovascular events, weight, lipids, BP, side effects

Response to contact: Yes

**Notes** All on step 1 AHA diet.

#### Risk of bias table

| Bias                                                      | Authors' judgement | Support for judgement                                                                                                                           |
|-----------------------------------------------------------|--------------------|-------------------------------------------------------------------------------------------------------------------------------------------------|
| Random sequence generation (selection bias)               | Low risk           | Randomisation was by study statistician and distribution by a pharmacist - only the research pharmacist was blinded at each centre              |
| Allocation concealment (selection bias)                   | Low risk           | As above                                                                                                                                        |
| Blinding of participants and personnel (performance bias) | Low risk           | Participants blinded by adding small amount of fish oil to placebo capsules. Only statistician and PI were unblinded at the coordinating center |
| Blinding of outcome assessment (detection bias)           | Low risk           | as above                                                                                                                                        |
| Incomplete outcome data (attrition bias)                  | Unclear risk       | Data fully reported                                                                                                                             |
| Selective reporting (reporting bias)                      | Unclear risk       | Study protocol found (NCT00000473) BUT submitted in 1999 (study published in 1994)                                                              |
| Other bias                                                | Low risk           | No further bias noted                                                                                                                           |

#### Galarraga 2008 <sup>44</sup>

**Methods** RCT (LCn3 vs air filled placebo), 9 months

Summary risk of bias: moderate to high

**Participants** People with rheumatoid arthritis

N: 49 LCn3 int., 48 control

Level of risk for CVD: low

Location: UK

**Interventions** Type: supplementary capsules

Comparison: diet rich in seven seas marine oil, LCn3 vs air-filled placebo capsules

Intervention: 10g/d seven seas marine oil (cod liver oil and fish oil), 1.5g/d EPA + 0.7g/d DHA (2.2g/d LCn3).

Control: 10 air-filled capsules/d

**PUFA Dose:** (intended) increase 1%E n-3, 1%E LCn3, 1%E PUFA

Duration of intervention: 9 months

**Outcomes** Main study outcome: reduction in NSAID intake

Available outcomes: pain, grip strength, early morning stiffness, HAQ, CRP

Response to contact: not yet attempted

**Notes**

#### Risk of bias table

| Bias | Authors' judgement | Support for judgement |
|------|--------------------|-----------------------|
|------|--------------------|-----------------------|

|                                                           |              |                                                                                                            |
|-----------------------------------------------------------|--------------|------------------------------------------------------------------------------------------------------------|
| Random sequence generation (selection bias)               | Low risk     | randomisation generated manually in blocks of 10                                                           |
| Allocation concealment (selection bias)                   | Unclear risk | unclear                                                                                                    |
| Blinding of participants and personnel (performance bias) | High risk    | stated as double blind, but some withdrawals were due to fishy taste or awareness that capsules were empty |
| Blinding of outcome assessment (detection bias)           | Unclear risk | unclear                                                                                                    |
| Incomplete outcome data (attrition bias)                  | Low risk     | all participants assessed for adverse events                                                               |
| Selective reporting (reporting bias)                      | Unclear risk | No protocol or trials registry entry found                                                                 |
| Other bias                                                | Unclear risk |                                                                                                            |

## Garcia-Medina 2011 45 46

|                      |                                                                                                                                                                                                                                                                                                                                                                                                                                                                                                                                                                                                                                                                                        |
|----------------------|----------------------------------------------------------------------------------------------------------------------------------------------------------------------------------------------------------------------------------------------------------------------------------------------------------------------------------------------------------------------------------------------------------------------------------------------------------------------------------------------------------------------------------------------------------------------------------------------------------------------------------------------------------------------------------------|
| <b>Methods</b>       | RCT, 3 arms (LCn3 vs nil), 24 months<br>Summary risk of bias: not yet assessed                                                                                                                                                                                                                                                                                                                                                                                                                                                                                                                                                                                                         |
| <b>Participants</b>  | People with primary open-angle glaucoma<br>N: 26 LCn3 int., 28 control<br>Level of risk for CVD: low<br>Location: Spain                                                                                                                                                                                                                                                                                                                                                                                                                                                                                                                                                                |
| <b>Interventions</b> | Type: Supplement (capsules)<br>Comparison: LCn3 vs nil<br>Intervention: 1 capsule/d oral antioxidants plus LCn3 (ICAPS, Alcon Labs, 85mg EPA, 95mg DHA per capsule), 0.18g/d LCn3 (antioxidants include Vits A, B, D, E, lutein, Zeaxanthin, zinc, copper, selenium & manganese)<br>Control: 1 capsule/d oral antioxidants without LCn3 (OFTAN MACULA, Esteve Labs, 0mg EPA, 0mg DHA per capsule), 0g/d LCn3 (antioxidants include Vits A, B, D, E, lutein, Zeaxanthin, zinc, copper, selenium & manganese, some at slightly different doses than ICAPS)<br><b>PUFA Dose:</b> (intended) increase <b>0.08%E n-3, 0.08 %E LCn3, 0.08 %E PUFA</b><br>Duration of intervention: 24 months |
| <b>Outcomes</b>      | Main study outcome: eye outcomes<br>Available outcomes: visual field, peripapillary retinal nerve fibre layer thickness, macular ganglion cell complex thickness, fast MD deterioration (no deaths occurred)<br>Response to contact: not yet attempted                                                                                                                                                                                                                                                                                                                                                                                                                                 |
| <b>Notes</b>         | Note: additional arm gave neither antioxidants nor n3                                                                                                                                                                                                                                                                                                                                                                                                                                                                                                                                                                                                                                  |

### Risk of bias table

| Bias                                                      | Authors' judgement | Support for judgement |
|-----------------------------------------------------------|--------------------|-----------------------|
| Random sequence generation (selection bias)               | Unclear risk       |                       |
| Allocation concealment (selection bias)                   | Unclear risk       |                       |
| Blinding of participants and personnel (performance bias) | Unclear risk       |                       |
| Blinding of outcome assessment (detection bias)           | Unclear risk       |                       |
| Incomplete outcome data (attrition bias)                  | Unclear risk       |                       |

|                                      |              |
|--------------------------------------|--------------|
| Selective reporting (reporting bias) | Unclear risk |
| Other bias                           | Unclear risk |

## Geusens 1994 <sup>47</sup>

|                      |                                                                                                                                                                                                                                                                                                                                                             |
|----------------------|-------------------------------------------------------------------------------------------------------------------------------------------------------------------------------------------------------------------------------------------------------------------------------------------------------------------------------------------------------------|
| <b>Methods</b>       | RCT, 3 arms (LCn3 higher dose vs LCn3 lower dose vs MUFA) 12 months<br>Summary risk of bias: medium or high                                                                                                                                                                                                                                                 |
| <b>Participants</b>  | People with active rheumatoid arthritis on NSAIDs or DMARDs<br>N: 30 low dose, 30 high dose, 30 control<br>Level of risk for CVD: Low<br>Male: 23.8% low dose, 21.0% high dose, 20.0% control<br>Mean age, sd: 57, 9.2 low dose, 59, 8.7 high dose, 56, 8.9 control<br>Age range: Unclear<br>Smokers: Unclear<br>Hypertension: Unclear<br>Location: Belgium |
| <b>Interventions</b> | Type: supplement (capsule)<br>Intervention: fish oil capsules, 3/d plus 3 olive oil capsules (1.3g EPA + DHA daily) low dose, fish oil capsules, 6/d (2.6g EPA + DHA daily) high dose<br>Control: olive oil capsules, 6/d<br>Compliance: capsule count (results not reported)<br>Length of intervention: 12 mo                                              |
| <b>Outcomes</b>      | Main study outcome: arthritic symptoms<br>Dropouts: 9 low dose, 11 high dose, 10 control<br>Available outcomes: deaths, side effects<br>Response to contact: No                                                                                                                                                                                             |
| <b>Notes</b>         | All 3 groups had a stable diet with 30% fat and fish eaten once a week prescribed.                                                                                                                                                                                                                                                                          |

### Risk of bias table

| Bias                                                      | Authors' judgement | Support for judgement                             |
|-----------------------------------------------------------|--------------------|---------------------------------------------------|
| Random sequence generation (selection bias)               | Unclear risk       | 'randomly assigned'                               |
| Allocation concealment (selection bias)                   | Unclear risk       | Unclear                                           |
| Blinding of participants and personnel (performance bias) | Low risk           | Participants masked: Yes<br>Providers masked: Yes |
| Blinding of outcome assessment (detection bias)           | Low risk           | Outcome assessors masked: Yes                     |
| Incomplete outcome data (attrition bias)                  | Unclear risk       |                                                   |
| Selective reporting (reporting bias)                      | Unclear risk       |                                                   |
| Other bias                                                | Unclear risk       |                                                   |

## Ghadian 2017 <sup>48</sup>

|                     |                                                                                                                                                     |
|---------------------|-----------------------------------------------------------------------------------------------------------------------------------------------------|
| <b>Methods</b>      | RCT (n3 vs nil), 6 months<br>Summary risk of bias: not yet assessed                                                                                 |
| <b>Participants</b> | Men with lower urinary tract symptoms and benign prostatic hyperplasia<br>N: 50 n3 int., 50 control<br>Level of risk for CVD: low<br>Location: Iran |

**Interventions** Type: Supplement (capsules)  
 Comparison: n3 vs nil (both )  
 Intervention: 3x300mg omega 3/d, 0.9g/d n3 (as Natural Wealth Omega-3 softgels) with finasteride 5mg/d and tamsulocin 0.4mg/d  
 Control: nil with finasteride 5mg/d and tamsulocin 0.4mg/d  
**PUFA Dose:** (intended) increase 0.4%E n-3, unclear %E LCn3, unclear %E PUFA  
 Duration of intervention: 6 months

**Outcomes** Main study outcome: prostate outcomes  
 Available outcomes: prostate outcomes (volume, symptoms), adverse events (no deaths or CVD events, or abnormal bleeding, one GI event in control group, none in intervention, others are sexual health outcomes  
 Response to contact: not yet attempted

Notes

| Risk of bias table                                        |                    |                       |
|-----------------------------------------------------------|--------------------|-----------------------|
| Bias                                                      | Authors' judgement | Support for judgement |
| Random sequence generation (selection bias)               | Unclear risk       |                       |
| Allocation concealment (selection bias)                   | Unclear risk       |                       |
| Blinding of participants and personnel (performance bias) | Unclear risk       |                       |
| Blinding of outcome assessment (detection bias)           | Unclear risk       |                       |
| Incomplete outcome data (attrition bias)                  | Unclear risk       |                       |
| Selective reporting (reporting bias)                      | Unclear risk       |                       |
| Other bias                                                | Unclear risk       |                       |

Hamazaki 2006 49

**Methods** RCT (ALA vs n6), 8 months  
 Summary risk of bias: not yet assessed

**Participants** People with recurrent aphthous stomatitis  
 N: 15 LCn3 int., 15 control  
 Level of risk for CVD: low  
 Location: Japan

**Interventions** Type: Supplement (capsules)  
 Comparison: ALA vs n6  
 Intervention: perilla oil used for cooking, ~60% ALA  
 Control: soybean oil used for cooking  
**PUFA Dose:** (intended) increase unclear %E n-3, 0%E LCn3, unclear % n-6, unclear %E PUFA  
 Duration of intervention: 8 months

**Outcomes** Main study outcome: occurrences of recurrent aphthous stomatitis  
 Available outcomes: recurrent aphthous stomatitis  
 Response to contact: none

Notes

| Risk of bias table |                    |                       |
|--------------------|--------------------|-----------------------|
| Bias               | Authors' judgement | Support for judgement |

|                                                              |              |
|--------------------------------------------------------------|--------------|
| Random sequence generation<br>(selection bias)               | Unclear risk |
| Allocation concealment (selection<br>bias)                   | Unclear risk |
| Blinding of participants and personnel<br>(performance bias) | Unclear risk |
| Blinding of outcome assessment<br>(detection bias)           | Unclear risk |
| Incomplete outcome data (attrition<br>bias)                  | Unclear risk |
| Selective reporting (reporting bias)                         | Unclear risk |
| Other bias                                                   | Unclear risk |

## Hansen 2010 <sup>50 51</sup>

|                      |                                                                                                                                                                                                                                                                                                                                                                                                                                       |
|----------------------|---------------------------------------------------------------------------------------------------------------------------------------------------------------------------------------------------------------------------------------------------------------------------------------------------------------------------------------------------------------------------------------------------------------------------------------|
| <b>Methods</b>       | RCT (diet rich in LCn3 vs diet low in LCn3), 6 months<br>Summary risk of bias: not yet assessed                                                                                                                                                                                                                                                                                                                                       |
| <b>Participants</b>  | Prisoners<br>N: 38 high LCn3 int., 40 low LCn3 control<br>Level of risk for CVD: moderate<br>Location: Norway                                                                                                                                                                                                                                                                                                                         |
| <b>Interventions</b> | Type: Provided diet (to prisoners)<br>Comparison: diet rich in LCn3 vs diet low in LCn3<br>Intervention: Diet provided included 3 seafood dinners (including mostly fatty fish)/week, 69 fatty fish main courses over 23 weeks<br>Control: usual prison diet, 6 fatty fish main courses over 23 weeks<br><b>PUFA Dose:</b> (intended) increase unclear %E n-3, unclear %E LCn3, unclear %E PUFA<br>Duration of intervention: 23 weeks |
| <b>Outcomes</b>      | Main study outcome: heart rate variability<br>Available outcomes: heart rate variability components, vitamin D<br>Response to contact: replied but did not provide any useful information                                                                                                                                                                                                                                             |
| <b>Notes</b>         |                                                                                                                                                                                                                                                                                                                                                                                                                                       |

### Risk of bias table

| Bias                                                         | Authors' judgement | Support for judgement |
|--------------------------------------------------------------|--------------------|-----------------------|
| Random sequence generation<br>(selection bias)               | Unclear risk       |                       |
| Allocation concealment (selection<br>bias)                   | Unclear risk       |                       |
| Blinding of participants and personnel<br>(performance bias) | Unclear risk       |                       |
| Blinding of outcome assessment<br>(detection bias)           | Unclear risk       |                       |
| Incomplete outcome data (attrition<br>bias)                  | Unclear risk       |                       |
| Selective reporting (reporting bias)                         | Unclear risk       |                       |
| Other bias                                                   | Unclear risk       |                       |

## Harbige 2007 <sup>52</sup>

|                      |                                                                                                                                                                                                                                                                                                                                                        |
|----------------------|--------------------------------------------------------------------------------------------------------------------------------------------------------------------------------------------------------------------------------------------------------------------------------------------------------------------------------------------------------|
| <b>Methods</b>       | RCT 3 arms (high GLA n6 vs low GLA n6 vs polyethylene glycol 400), 18 months<br>Summary risk of bias: not yet assessed                                                                                                                                                                                                                                 |
| <b>Participants</b>  | People with active multiple sclerosis<br>N: 11 high n6 int., 7 low dose n6, 10 control<br>Level of risk for CVD: low<br>Location: UK                                                                                                                                                                                                                   |
| <b>Interventions</b> | Type: supplementary oil (in capsules?)<br>Comparison: borage oil rich in GLA n6 high and low dose vs PEG<br>Intervention: high dose 14g/d borage oil (n6 dose unclear), vs low dose 5g/d borage oil<br>Control: polyethylene glycol 400<br><b>PUFA Dose:</b> (intended) increase unclear % n-6, unclear %E PUFA<br>Duration of intervention: 18 months |
| <b>Outcomes</b>      | Main study outcome: MS relapse rate<br>Available outcomes: Expanded disability status scale, PBMC cytokine levels, TNF alpha, TGF beta, IL-1, DGLA<br>Response to contact: yes                                                                                                                                                                         |
| <b>Notes</b>         |                                                                                                                                                                                                                                                                                                                                                        |

### Risk of bias table

| Bias                                                      | Authors' judgement | Support for judgement |
|-----------------------------------------------------------|--------------------|-----------------------|
| Random sequence generation (selection bias)               | Unclear risk       |                       |
| Allocation concealment (selection bias)                   | Unclear risk       |                       |
| Blinding of participants and personnel (performance bias) | Unclear risk       |                       |
| Blinding of outcome assessment (detection bias)           | Unclear risk       |                       |
| Incomplete outcome data (attrition bias)                  | Unclear risk       |                       |
| Selective reporting (reporting bias)                      | Unclear risk       |                       |
| Other bias                                                | Unclear risk       |                       |

## Harris 1991 <sup>53</sup>

|                      |                                                                                                                                                                                                                                                                                                                                                                                                |
|----------------------|------------------------------------------------------------------------------------------------------------------------------------------------------------------------------------------------------------------------------------------------------------------------------------------------------------------------------------------------------------------------------------------------|
| <b>Methods</b>       | RCT 4 arms (various doses of LCn3 vs lower dose LCn3), 6 months<br>Summary risk of bias: not yet assessed                                                                                                                                                                                                                                                                                      |
| <b>Participants</b>  | People with hyperlipidaemia<br>N: 8 high LCn3 int., 5 moderate, 9 low, 6 very low LCn3<br>Level of risk for CVD: moderate<br>Location: USA                                                                                                                                                                                                                                                     |
| <b>Interventions</b> | Type: supplementary capsules<br>Comparison: different doses of LCn3<br>Intervention: 12x1g/d fish oil capsules, 5g/d LCn3, 9x1g/d fish oil capsules, 3.8g/d LCn3, 6x1g/d fish oil capsules, 2.5g/d LCn3<br>Control: 3x1g/d fish oil capsules, 1.3g/d LCn3<br><b>PUFA Dose:</b> (intended) increase <b>2.3%E LCn3, 1.7%E LCn3, 1.2%E LCn3, 0.6%E LCn3</b><br>Duration of intervention: 6 months |
| <b>Outcomes</b>      | Main study outcome: lipids<br>Available outcomes: RBC deformability, bleeding time<br>Response to contact: not yet attempted                                                                                                                                                                                                                                                                   |
| <b>Notes</b>         |                                                                                                                                                                                                                                                                                                                                                                                                |

## Risk of bias table

| Bias                                                      | Authors' judgement | Support for judgement |
|-----------------------------------------------------------|--------------------|-----------------------|
| Random sequence generation (selection bias)               | Unclear risk       |                       |
| Allocation concealment (selection bias)                   | Unclear risk       |                       |
| Blinding of participants and personnel (performance bias) | Unclear risk       |                       |
| Blinding of outcome assessment (detection bias)           | Unclear risk       |                       |
| Incomplete outcome data (attrition bias)                  | Unclear risk       |                       |
| Selective reporting (reporting bias)                      | Unclear risk       |                       |
| Other bias                                                | Unclear risk       |                       |

## Henz 1999 <sup>54</sup>

|                      |                                                                                                                                                                                                                                                                                                             |
|----------------------|-------------------------------------------------------------------------------------------------------------------------------------------------------------------------------------------------------------------------------------------------------------------------------------------------------------|
| <b>Methods</b>       | RCT (n6 vs other fat), 6 months<br>Summary risk of bias: not yet assessed                                                                                                                                                                                                                                   |
| <b>Participants</b>  | People with atopic eczema<br>N: 80 n6 int., 80 control<br>Level of risk for CVD: low<br>Location: several European countries                                                                                                                                                                                |
| <b>Interventions</b> | Type: Supplement (capsules)<br>Comparison: n6 vs other fat<br>Intervention: 6x500mg capsules/d borage oil, 23% GLA or 0.69g/d GLA<br>Control: 6x500mg capsules/d bland oil (miglyol)<br><b>PUFA Dose:</b> (intended) increase 0%E n-3, 0%E LCn3, 0.3% n-6, 0.3%E PUFA<br>Duration of intervention: 26 weeks |
| <b>Outcomes</b>      | Main study outcome: eczema outcomes<br>Available outcomes: Costa score, corticosteroid use, serum IgE, %responders<br>Response to contact: not yet attempted                                                                                                                                                |
| <b>Notes</b>         |                                                                                                                                                                                                                                                                                                             |

## Risk of bias table

| Bias                                                      | Authors' judgement | Support for judgement |
|-----------------------------------------------------------|--------------------|-----------------------|
| Random sequence generation (selection bias)               | Unclear risk       |                       |
| Allocation concealment (selection bias)                   | Unclear risk       |                       |
| Blinding of participants and personnel (performance bias) | Unclear risk       |                       |
| Blinding of outcome assessment (detection bias)           | Unclear risk       |                       |
| Incomplete outcome data (attrition bias)                  | Unclear risk       |                       |
| Selective reporting (reporting bias)                      | Unclear risk       |                       |
| Other bias                                                | Unclear risk       |                       |



## Holguin 2005 <sup>55</sup>

- Methods** RCT (LCn3 vs n6), 6 months  
Summary risk of bias: not yet assessed
- Participants** Elderly nursing home residents  
N: 26 LCn3 int., 26 control  
Level of risk for CVD: low  
Location: USA
- Interventions** Type: Supplement capsules  
Comparison: fish oil LCn3 vs soy oil  
Intervention: 2g/d fish oil capsules, 83% LCn3, 1.7g/d LCn3  
Control: 2g/d soy oil capsules  
**PUFA Dose:** (intended) increase **0.7%E n-3, 0.7%E LCn3, unclear %E PUFA**  
Duration of intervention: 6 months
- Outcomes** Main study outcome: heart rate variability  
Available outcomes: heart rate  
Response to contact: not yet attempted
- Notes**

### Risk of bias table

| Bias                                                      | Authors' judgement | Support for judgement |
|-----------------------------------------------------------|--------------------|-----------------------|
| Random sequence generation (selection bias)               | Unclear risk       |                       |
| Allocation concealment (selection bias)                   | Unclear risk       |                       |
| Blinding of participants and personnel (performance bias) | Unclear risk       |                       |
| Blinding of outcome assessment (detection bias)           | Unclear risk       |                       |
| Incomplete outcome data (attrition bias)                  | Unclear risk       |                       |
| Selective reporting (reporting bias)                      | Unclear risk       |                       |
| Other bias                                                | Unclear risk       |                       |

## Horrobin 1997 <sup>56</sup>

- Methods** RCT (GLA n6 vs unclear placebo), 12 months  
Summary risk of bias: not yet assessed
- Participants** People with mild to moderate diabetic neuropathy  
N: 202 n6 int., 202 control  
Level of risk for CVD: moderate  
Location: UK, Sweden, Finland, Germany plus
- Interventions** Type: Supplement capsules  
Comparison: GLA n6 vs unclear placebo  
Intervention: 0.48g/d GLA  
Control: unclear placebo  
**PUFA Dose:** (intended) increase **0%E n-3, 0%E LCn3, 0.2%E n6, unclear %E PUFA**  
Duration of intervention: 12 months
- Outcomes** Main study outcome: symptoms of diabetic neuropathy  
Available outcomes: thermal threshold, clinical sensory assessments, electrophysiological measures

**Notes** Response to contact: Horrobin has died, no other contacts could be established  
Caution: may be some shared participants with GLAMT

### Risk of bias table

| Bias                                                      | Authors' judgement | Support for judgement |
|-----------------------------------------------------------|--------------------|-----------------------|
| Random sequence generation (selection bias)               | Unclear risk       |                       |
| Allocation concealment (selection bias)                   | Unclear risk       |                       |
| Blinding of participants and personnel (performance bias) | Unclear risk       |                       |
| Blinding of outcome assessment (detection bias)           | Unclear risk       |                       |
| Incomplete outcome data (attrition bias)                  | Unclear risk       |                       |
| Selective reporting (reporting bias)                      | Unclear risk       |                       |
| Other bias                                                | Unclear risk       |                       |

## J-EACH - Domei 2013 <sup>57</sup>

**Methods** RCT (LCn3 vs nil), 6 months  
Summary risk of bias: moderate to high

**Participants** Patients having an elective PCI  
N: 20 LCn3 int., 17 control  
Level of risk for CVD: high  
Location: Japan

**Interventions** Type: Supplement (capsules)  
Comparison: LCn3 vs nil  
Intervention: EPA (dose unclear) plus statin  
Control: statin alone (no placebo)  
**PUFA Dose:** (intended) increase unclear %E n-3, unclear %E LCn3, unclear %E PUFA  
Duration of intervention: 6 months

**Outcomes** Main study outcome: atherosclerosis progression  
Available outcomes: diameter of stenosis, EPA to AA ratio, lipids  
Response to contact: not yet attempted

**Notes** Note: only abstract located

### Risk of bias table

| Bias                                                      | Authors' judgement | Support for judgement                      |
|-----------------------------------------------------------|--------------------|--------------------------------------------|
| Random sequence generation (selection bias)               | Unclear risk       |                                            |
| Allocation concealment (selection bias)                   | Unclear risk       |                                            |
| Blinding of participants and personnel (performance bias) | High risk          | No placebo, participants were not blinded. |
| Blinding of outcome assessment (detection bias)           | Unclear risk       |                                            |

|                                          |              |
|------------------------------------------|--------------|
| Incomplete outcome data (attrition bias) | Unclear risk |
| Selective reporting (reporting bias)     | Unclear risk |
| Other bias                               | Unclear risk |

## Jamal 1986 <sup>58 59</sup>

|                      |                                                                                                                                                                                                                                                                                                            |
|----------------------|------------------------------------------------------------------------------------------------------------------------------------------------------------------------------------------------------------------------------------------------------------------------------------------------------------|
| <b>Methods</b>       | RCT (GLA n6 vs unclear placebo), 6 months<br>Summary risk of bias: moderate to high                                                                                                                                                                                                                        |
| <b>Participants</b>  | Patients with diabetic neuropathy<br>N: 12 int., 10 control<br>Level of risk for CVD: moderate<br>Location: UK                                                                                                                                                                                             |
| <b>Interventions</b> | Type: Supplementary capsules<br>Comparison: GLA in evening primrose oil vs identical placebo<br>Intervention: 8x 500mg capsules/d providing 8x360mg GLA, 2.9g/d GLA<br>Control: unclear placebo<br><b>PUFA Dose:</b> (intended) increase <b>1.3% n-6, 1.3%E PUFA</b><br>Duration of intervention: 6 months |
| <b>Outcomes</b>      | Main study outcome: measures of diabetic neuropathy<br>Available outcomes: motor nerve conduction velocity, amplitude of sensory nerve action potentials, heat threshold, cold threshold<br>Response to contact: yes                                                                                       |
| <b>Notes</b>         |                                                                                                                                                                                                                                                                                                            |

### Risk of bias table

| Bias                                                      | Authors' judgement | Support for judgement               |
|-----------------------------------------------------------|--------------------|-------------------------------------|
| Random sequence generation (selection bias)               | Unclear risk       |                                     |
| Allocation concealment (selection bias)                   | Unclear risk       |                                     |
| Blinding of participants and personnel (performance bias) | Unclear risk       |                                     |
| Blinding of outcome assessment (detection bias)           | Unclear risk       |                                     |
| Incomplete outcome data (attrition bias)                  | Unclear risk       |                                     |
| Selective reporting (reporting bias)                      | Unclear risk       |                                     |
| Other bias                                                | Unclear risk       | Accusation of research fraud by GMC |

## Jenkins 1996 <sup>60</sup>

|                      |                                                                                                                                                    |
|----------------------|----------------------------------------------------------------------------------------------------------------------------------------------------|
| <b>Methods</b>       | RCT (GLA vs non-fat), 12 months<br>Summary risk of bias: not yet assessed                                                                          |
| <b>Participants</b>  | People with chronic hepatitis B<br>N: ~12 GLA int., ~12 control (24 total)<br>Level of risk for CVD: low<br>Location: UK                           |
| <b>Interventions</b> | Type: Supplement (capsules)<br>Comparison: GLA vs non-fat<br>Intervention: 4g/d evening primrose oil (8x500mg capsules with 10mg vit E), 9% GLA or |

0.36g/d, 75% LA or 3g/d, 3.36g/d n6

Control: liquid paraffin similarly administered in identical gelatin capsules (no vitamin E)

**PUFA Dose:** (intended) increase 0%E n-3, 0%E LCn3, 1.5% n-6, 1.5%E PUFA

Duration of intervention: 12 months

**Outcomes** Main study outcome: liver disease

Available outcomes: hepatitis B antigens, serum alanine transferase (biochemical and histological indices of liver damage)

Response to contact: not yet attempted

## Notes

### Risk of bias table

| Bias                                                      | Authors' judgement | Support for judgement |
|-----------------------------------------------------------|--------------------|-----------------------|
| Random sequence generation (selection bias)               | Unclear risk       |                       |
| Allocation concealment (selection bias)                   | Unclear risk       |                       |
| Blinding of participants and personnel (performance bias) | Unclear risk       |                       |
| Blinding of outcome assessment (detection bias)           | Unclear risk       |                       |
| Incomplete outcome data (attrition bias)                  | Unclear risk       |                       |
| Selective reporting (reporting bias)                      | Unclear risk       |                       |
| Other bias                                                | Unclear risk       |                       |

## Khan 2003 <sup>61</sup>

|                      |                                                                                                                                                                                                                                                                                                                                                                                                                                                                                                                                                                                                                                                                                                                                                  |
|----------------------|--------------------------------------------------------------------------------------------------------------------------------------------------------------------------------------------------------------------------------------------------------------------------------------------------------------------------------------------------------------------------------------------------------------------------------------------------------------------------------------------------------------------------------------------------------------------------------------------------------------------------------------------------------------------------------------------------------------------------------------------------|
| <b>Methods</b>       | RCT, 6 arms (n6 vs n3 vs total PUFA vs MUFA), 8 months<br>Summary risk of bias: not yet assessed                                                                                                                                                                                                                                                                                                                                                                                                                                                                                                                                                                                                                                                 |
| <b>Participants</b>  | Healthy non-smoking adults<br>N: 31 EPO n6 int., 28 soya oil n6 int, 28 LCn3 tuna int, 28 total PUFA (tuna & EPO) int, 30 MUFA int, 28 usual Scottish fat control<br>Level of risk for CVD: low<br>Location: UK                                                                                                                                                                                                                                                                                                                                                                                                                                                                                                                                  |
| <b>Interventions</b> | Type: Supplement (emulsions)<br>Comparison: n6 vs n3 vs total PUFA vs MUFA<br>Interventions: all 50ml daily doses of 20% oil-water emulsion, peppermint flavoured, inc tocopherol<br>EPO n6: 400mg/d GLA + 3.3g/d LA - (intended) increase 0%E n-3, 0%E LCn3, 1.7% n-6, 1.7%E PUFA<br>soya n6: 3.2g/d LA - (intended) increase 0%E n-3, 0%E LCn3, 1.4% n-6, 1.4%E PUFA<br>tuna LCn3: 1.1g/d LCn3 (of which 0.9g/d DHA, 0.2g/d EPA) - (intended) increase 0.5%E n-3, 0.5%E LCn3, 0% n-6, 0.5%E PUFA<br>total PUFA: 3.8g/d PUFA (including EPA, DHA, GLA, LA, ALA and AA) - (intended) increase 0.5%E n-3, 0.5%E LCn3, 1.7% n-6, 2.2%E PUFA<br>MUFA: 1.6g/d PUFA - control<br>placebo: 1.3g/d PUFA - control<br>Duration of intervention: 8 months |
| <b>Outcomes</b>      | Main study outcome: endothelial function and vascular tone<br>Available outcomes: peak vasodilator responses,<br>Response to contact: not yet attempted                                                                                                                                                                                                                                                                                                                                                                                                                                                                                                                                                                                          |

## Notes

### Risk of bias table

| Bias                                                      | Authors' judgement | Support for judgement |
|-----------------------------------------------------------|--------------------|-----------------------|
| Random sequence generation (selection bias)               | Unclear risk       |                       |
| Allocation concealment (selection bias)                   | Unclear risk       |                       |
| Blinding of participants and personnel (performance bias) | Unclear risk       |                       |
| Blinding of outcome assessment (detection bias)           | Unclear risk       |                       |
| Incomplete outcome data (attrition bias)                  | Unclear risk       |                       |
| Selective reporting (reporting bias)                      | Unclear risk       |                       |
| Other bias                                                | Unclear risk       |                       |

## Kojuri 2013 – NCT01227837 <sup>62</sup>

- Methods** RCT (n3 (unclear if ALA or LCn3) vs water), 6 months  
Summary risk of bias: not yet assessed
- Participants** People with congestive heart failure  
N: 38 n3 int., 32 control  
Level of risk for CVD: high  
Location: Iran
- Interventions** Type: Supplementary capsules  
Comparison: n3 vs water  
Intervention: 2x1g/d n3  
Control: capsules of water  
**PUFA Dose:** (intended) increase 1%E n-3  
Duration of intervention: 6 months
- Outcomes** Main study outcome: BNP  
Available outcomes: 6-min walk test, echocardiographic findings  
Response to contact: not yet attempted

## Notes

### Risk of bias table

| Bias                                                      | Authors' judgement | Support for judgement |
|-----------------------------------------------------------|--------------------|-----------------------|
| Random sequence generation (selection bias)               | Unclear risk       |                       |
| Allocation concealment (selection bias)                   | Unclear risk       |                       |
| Blinding of participants and personnel (performance bias) | Unclear risk       |                       |
| Blinding of outcome assessment (detection bias)           | Unclear risk       |                       |
| Incomplete outcome data (attrition bias)                  | Unclear risk       |                       |
| Selective reporting (reporting bias)                      | Unclear risk       |                       |

Other bias

Unclear risk

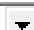

## Kokke 2008 <sup>63</sup>

- Methods** RCT (GLA vs MUFA), 6 months  
Summary risk of bias: not yet assessed
- Participants** People with contact lens associated dry eye  
N: ~38 GLA int., ~38 control  
Level of risk for CVD: low  
Location: UK
- Interventions** Type: Supplement (capsules)  
Comparison: GLA vs MUFA  
Intervention: evening primrose oil rich in GLA (10.5% GLA, 72.6% LA), 50mg GLA/capsule but unclear how many capsules/d  
Control: olive oil, 78% MUFA, quantity unclear  
**PUFA Dose:** (intended) increase **unclear % n-6, unclear %E PUFA**  
Duration of intervention: 6 months
- Outcomes** Main study outcome: eye dryness  
Available outcomes: eye dryness, contact lens comfort, tear film characteristics, meibomian gland function, ocular surface parameters  
Response to contact: not yet attempted

### Notes

### Risk of bias table

| Bias                                                      | Authors' judgement | Support for judgement |
|-----------------------------------------------------------|--------------------|-----------------------|
| Random sequence generation (selection bias)               | Unclear risk       |                       |
| Allocation concealment (selection bias)                   | Unclear risk       |                       |
| Blinding of participants and personnel (performance bias) | Unclear risk       |                       |
| Blinding of outcome assessment (detection bias)           | Unclear risk       |                       |
| Incomplete outcome data (attrition bias)                  | Unclear risk       |                       |
| Selective reporting (reporting bias)                      | Unclear risk       |                       |
| Other bias                                                | Unclear risk       |                       |

## Koziolova 2015 <sup>64</sup>

- Methods** RCT (n3 vs nil), 6 months  
Summary risk of bias: not yet assessed
- Participants** People with chronic heart failure and permanent atrial fibrillation  
N: 30 LCn3 int., 30 control  
Level of risk for CVD: high  
Location: Russia
- Interventions** Type: Supplement (capsules)  
Comparison: n3 vs nil  
Intervention: omega-3 PUFA (no further details) with basic treatment  
Control: nil with basic treatment  
**PUFA Dose:** (intended) increase **unclear %E n-3, unclear %E LCn3, unclear %E PUFA**  
Duration of intervention: 6 months

**Outcomes** Main study outcome: arterial wall structure & function  
 Available outcomes: arterial wall structure and function  
 Response to contact: not yet attempted

**Notes**

**Risk of bias table**

| Bias                                                      | Authors' judgement | Support for judgement |
|-----------------------------------------------------------|--------------------|-----------------------|
| Random sequence generation (selection bias)               | Unclear risk       |                       |
| Allocation concealment (selection bias)                   | Unclear risk       |                       |
| Blinding of participants and personnel (performance bias) | Unclear risk       |                       |
| Blinding of outcome assessment (detection bias)           | Unclear risk       |                       |
| Incomplete outcome data (attrition bias)                  | Unclear risk       |                       |
| Selective reporting (reporting bias)                      | Unclear risk       |                       |
| Other bias                                                | Unclear risk       |                       |

**Kurabayashi 2000** 65 66

**Methods** RCT (LCn3 vs nil), 11 months  
 Summary risk of bias: moderate to high

**Participants** hyperlipidaemic menopausal women  
 N: 69 LCn3 int., 72 control  
 Level of risk for CVD: moderate  
 Location: Japan

**Interventions** Type: supplementary capsules  
 Comparison: EPA vs nil  
 Intervention: EPA<sub>del</sub> capsules (Mochida pharmaceuticals), 1.8g/d (plus 3.5mg/d vit E) plus estriol (HRT, 2mg/d))  
 Control: Estriol only (2mg/d)  
**PUFA Dose:** (intended) increase **0.8%E n-3, 0.8%E LCn3, 0.8%E PUFA**  
 Duration of intervention: 48 weeks

**Outcomes** Main study outcome: lipids  
 Available outcomes: (no deaths or CV events)  
 Response to contact: not attempted

**Notes**

**Risk of bias table**

| Bias                                                      | Authors' judgement | Support for judgement                                                                                                    |
|-----------------------------------------------------------|--------------------|--------------------------------------------------------------------------------------------------------------------------|
| Random sequence generation (selection bias)               | Low risk           | opaque sealed envelopes prepared by staff not directly involved in subject care, using computer generated random numbers |
| Allocation concealment (selection bias)                   | Unclear risk       | unclear                                                                                                                  |
| Blinding of participants and personnel (performance bias) | High risk          | recipients were aware of assigned treatments (no placebo)                                                                |

|                                                 |              |         |
|-------------------------------------------------|--------------|---------|
| Blinding of outcome assessment (detection bias) | Unclear risk | unclear |
| Incomplete outcome data (attrition bias)        | Unclear risk |         |
| Selective reporting (reporting bias)            | Unclear risk |         |
| Other bias                                      | Unclear risk |         |

## Lau 1995 <sup>67 68</sup>

|                      |                                                                                                                                                                                                                                                                                                                                                           |
|----------------------|-----------------------------------------------------------------------------------------------------------------------------------------------------------------------------------------------------------------------------------------------------------------------------------------------------------------------------------------------------------|
| <b>Methods</b>       | RCT (LCn3 vs air filled capsules) 6 months<br>Summary risk of bias: low                                                                                                                                                                                                                                                                                   |
| <b>Participants</b>  | People with rheumatoid arthritis<br>N: 25 int., 20 control<br>Level of risk for CVD: Low<br>Male: 28% int., 30% control<br>Mean age, sd: median 50 int, median 52 control<br>Age range: 27-69 int., 28-69 control<br>Smokers: Unclear<br>Hypertension: Unclear<br>Location: Hong Kong, China                                                              |
| <b>Interventions</b> | Type: supplement (capsule)<br>Intervention: MaxEPA 10x 1g capsules daily (2.8g/d EPA + DHA)<br>Control: air-filled capsules, 10/d<br>Compliance: capsule counts, no data provided; red cell membrane phospholipids show rise in int. from 2.4% to 5.4% fatty acids and a fall in the control from 2.9 to 2.5% fatty acids<br>Length of intervention: 6 mo |
| <b>Outcomes</b>      | Main study outcome: fibrinolytic parameters<br>Dropouts: None<br>Available outcomes: deaths, MI, cardiovascular events, grip strength, pain, joint stiffness<br>Response to contact: Yes                                                                                                                                                                  |

### Notes

### Risk of bias table

| Bias                                                      | Authors' judgement | Support for judgement                             |
|-----------------------------------------------------------|--------------------|---------------------------------------------------|
| Random sequence generation (selection bias)               | Low risk           | Computer software system, blocks of 10            |
| Allocation concealment (selection bias)                   | Low risk           | Adequate                                          |
| Blinding of participants and personnel (performance bias) | Low risk           | Participants masked: Yes<br>Providers masked: Yes |
| Blinding of outcome assessment (detection bias)           | Low risk           | Outcome assessors masked: Yes                     |
| Incomplete outcome data (attrition bias)                  | Unclear risk       |                                                   |
| Selective reporting (reporting bias)                      | Unclear risk       |                                                   |
| Other bias                                                | Unclear risk       |                                                   |

## Malaguarnera 1999 <sup>69</sup>

|                |                                                                      |
|----------------|----------------------------------------------------------------------|
| <b>Methods</b> | RCT (LCn3 vs nil) 6 months<br>Summary risk of bias: moderate to high |
|----------------|----------------------------------------------------------------------|



**Participants** People with chronic hepatitis C  
N: 26 int., 26 control  
Level of risk for CVD: moderate  
Male: 46% int., 42% control  
Mean age, sd: 48.7, 6.5 int, 56.9, 7.2 control  
Age range: Unclear  
Smokers: Unclear  
Hypertension: Unclear  
Location: Italy

**Interventions** Type: supplement (capsule)  
Intervention: EPA + DHA daily (3g/d EPA + DHA) plus IFNa subcutaneously  
Control: nil, only IFNa subcutaneously  
Compliance: unused capsules returned after 2 mo, no-one returned >3 capsules  
Length of intervention: 6 mo

**Outcomes** Main study outcome: liver enzymes  
Dropouts: Unclear  
Available outcomes: combined cardiovascular events, psychiatric disorders, lipids, ALT, side effects  
Response to contact: No

**Notes**

**Risk of bias table**

| Bias                                                      | Authors' judgement | Support for judgement                                |
|-----------------------------------------------------------|--------------------|------------------------------------------------------|
| Random sequence generation (selection bias)               | Unclear risk       | 'randomly assigned'                                  |
| Allocation concealment (selection bias)                   | Unclear risk       | Unclear                                              |
| Blinding of participants and personnel (performance bias) | High risk          | Participants masked: No<br>Providers masked: Unclear |
| Blinding of outcome assessment (detection bias)           | Unclear risk       | Outcome assessors masked: Unclear                    |
| Incomplete outcome data (attrition bias)                  | Unclear risk       |                                                      |
| Selective reporting (reporting bias)                      | Unclear risk       |                                                      |
| Other bias                                                | Unclear risk       |                                                      |

**Masterton 2015** <sup>70</sup>

**Methods** RCT (n3 (unclear if ALA or LCn3) vs placebo), 6 months  
Summary risk of bias: not yet assessed

**Participants** Non-alcoholic fatty liver disease  
N: ~25 n3 int., ~25 control  
Level of risk for CVD: low  
Location: UK

**Interventions** Type: Unclear, probably supplementary capsules  
Comparison: n3 vs placebo  
Intervention: 4g/d n3 (no details of type)  
Control: placebo (no details)  
**PUFA Dose:** (intended) increase **1.8%E n-3**  
Duration of intervention: 6 months

**Outcomes** Main study outcome: steatosis (ultrasound grade)  
Available outcomes: liver function tests, QoL (WHOQOL-BREF)

Response to contact: not yet attempted

## Notes

### Risk of bias table

| Bias                                                      | Authors' judgement | Support for judgement |
|-----------------------------------------------------------|--------------------|-----------------------|
| Random sequence generation (selection bias)               | Unclear risk       |                       |
| Allocation concealment (selection bias)                   | Unclear risk       |                       |
| Blinding of participants and personnel (performance bias) | Unclear risk       |                       |
| Blinding of outcome assessment (detection bias)           | Unclear risk       |                       |
| Incomplete outcome data (attrition bias)                  | Unclear risk       |                       |
| Selective reporting (reporting bias)                      | Unclear risk       |                       |
| Other bias                                                | Unclear risk       |                       |

## McKew 2012 <sup>71</sup>

**Methods** RCT (LCn3 vs placebo), 6 months  
Summary risk of bias: not yet assessed

**Participants** People with systemic lupus erythematosus  
N: ~30 LCn3 int., ~30 control  
Level of risk for CVD: low  
Location: UK

**Interventions** Type: Supplements (probably capsules)  
Comparison: LCn3 vs placebo  
Intervention: 3g/d Omacor (1.8g/d EPA + 1.2g/d DHA)  
Control: placebo (unclear)  
**PUFA Dose:** (intended) increase **1.4%E n-3, 1.4%E LCn3**  
Duration of intervention: 6 months

**Outcomes** Main study outcome: QoL (SF-36)  
Available outcomes: QoL re emotional, pain, general health  
Response to contact: not yet attempted

## Notes

### Risk of bias table

| Bias                                                      | Authors' judgement | Support for judgement |
|-----------------------------------------------------------|--------------------|-----------------------|
| Random sequence generation (selection bias)               | Unclear risk       |                       |
| Allocation concealment (selection bias)                   | Unclear risk       |                       |
| Blinding of participants and personnel (performance bias) | Unclear risk       |                       |
| Blinding of outcome assessment (detection bias)           | Unclear risk       |                       |
| Incomplete outcome data (attrition bias)                  | Unclear risk       |                       |

|                                      |              |
|--------------------------------------|--------------|
| Selective reporting (reporting bias) | Unclear risk |
| Other bias                           | Unclear risk |

## Mehta 2008 72-73

|                      |                                                                                                                                                                                                                                                                                      |
|----------------------|--------------------------------------------------------------------------------------------------------------------------------------------------------------------------------------------------------------------------------------------------------------------------------------|
| <b>Methods</b>       | RCT (LCn3 vs nil), 6 months<br>Summary risk of bias: moderate to high                                                                                                                                                                                                                |
| <b>Participants</b>  | People with Barrett's oesophagus<br>N: 33 LCn3 int., 19 control<br>Level of risk for CVD: low<br>Location: UK                                                                                                                                                                        |
| <b>Interventions</b> | Type: Supplement (capsules)<br>Comparison: LCn3 vs nil<br>Intervention: 1.5g/d unesterified EPA (99% pure, in 500mg capsules)<br>Control: no supplementation<br><b>PUFA Dose:</b> (intended) increase <b>0.7%E n-3, 0.7%E LCn3, 0.7%E PUFA</b><br>Duration of intervention: 26 weeks |
| <b>Outcomes</b>      | Main study outcome: inflammatory markers<br>Available outcomes: inflammatory markers including COX2 protein, prostaglandin E2, leukotriene B4, RNA. Authors reported that no deaths, CVD events, cancer or diabetes diagnoses occurred.<br>Response to contact: yes                  |

### Notes

### Risk of bias table

| Bias                                                      | Authors' judgement | Support for judgement                                                                                                                                                                                    |
|-----------------------------------------------------------|--------------------|----------------------------------------------------------------------------------------------------------------------------------------------------------------------------------------------------------|
| Random sequence generation (selection bias)               | Unclear risk       | Authors stated "random allocation of sealed envelopes containing random numbers (generated by random-number software) prepared prior to recruitment. Cards were allocated by the principal investigator" |
| Allocation concealment (selection bias)                   | Unclear risk       | no details                                                                                                                                                                                               |
| Blinding of participants and personnel (performance bias) | High risk          | no placebo                                                                                                                                                                                               |
| Blinding of outcome assessment (detection bias)           | Unclear risk       |                                                                                                                                                                                                          |
| Incomplete outcome data (attrition bias)                  | Unclear risk       |                                                                                                                                                                                                          |
| Selective reporting (reporting bias)                      | Unclear risk       |                                                                                                                                                                                                          |
| Other bias                                                | Unclear risk       |                                                                                                                                                                                                          |

## Meyer 2007 74-76

|                      |                                                                                                                                                                                     |
|----------------------|-------------------------------------------------------------------------------------------------------------------------------------------------------------------------------------|
| <b>Methods</b>       | RCT (LCn3 at 2 doses vs MUFA), 6 months<br>Summary risk of bias: not yet assessed                                                                                                   |
| <b>Participants</b>  | People on statins with hyperlipidaemia and persistent raised TGs<br>N: 15 high LCn3 int., 15 low LC3 int, 15 MUFA control<br>Level of risk for CVD: moderate<br>Location: Australia |
| <b>Interventions</b> | Type: Supplement (capsules)                                                                                                                                                         |

Comparison: LCn3 at 2 doses vs MUFA  
 Intervention: 8g/d tuna oil (HiDHA) including 2.16g/d DHA plus 0.56g/d EPA. 4g/d tuna oil including 1.08g/d DHA plus 0.28g/d EPA  
 Control: 4 or 8g/d olive oil  
**PUFA Dose:** (intended) increase high dose **1.2%E n-3, 1.2%E LCn3, 1.2%E PUFA**  
**low dose: 0.6%E n-3, 0.6%E LCn3, 0.6%E PUFA**  
 Duration of intervention: 6 months

**Outcomes** Main study outcome: lipids  
 Available outcomes: lipids (authors reported no SAEs occurred - so no deaths, CVD events)  
 Response to contact: yes

## Notes

### Risk of bias table

| Bias                                                      | Authors' judgement | Support for judgement |
|-----------------------------------------------------------|--------------------|-----------------------|
| Random sequence generation (selection bias)               | Unclear risk       |                       |
| Allocation concealment (selection bias)                   | Unclear risk       |                       |
| Blinding of participants and personnel (performance bias) | Unclear risk       |                       |
| Blinding of outcome assessment (detection bias)           | Unclear risk       |                       |
| Incomplete outcome data (attrition bias)                  | Unclear risk       |                       |
| Selective reporting (reporting bias)                      | Unclear risk       |                       |
| Other bias                                                | Unclear risk       |                       |

## Millar 1973 <sup>77</sup>

**Methods** RCT (n6 vs MUFA), 24 months  
 Summary risk of bias: not yet assessed

**Participants** People with multiple sclerosis  
 N: 72 n6 int., 78 MUFA control  
 Level of risk for CVD: low  
 Location: UK

**Interventions** Type: oil emulsion  
 Comparison: n6 vs MUFA  
 Intervention: 2x30ml/d sunflower oil emulsion (17.2g/d LA)  
 Control: 2x30ml olive oil emulsion (7.6g/d oleic acid)  
**PUFA Dose:** (intended) increase **7.7% n-6, 07.7%E PUFA**  
 Duration of intervention: 24 months

**Outcomes** Main study outcome: MS relapses  
 Available outcomes: neurological assessment, disability, relapses  
 Response to contact: not yet attempted

## Notes

### Risk of bias table

| Bias                                        | Authors' judgement | Support for judgement |
|---------------------------------------------|--------------------|-----------------------|
| Random sequence generation (selection bias) | Unclear risk       |                       |

|                                                           |              |
|-----------------------------------------------------------|--------------|
| Allocation concealment (selection bias)                   | Unclear risk |
| Blinding of participants and personnel (performance bias) | Unclear risk |
| Blinding of outcome assessment (detection bias)           | Unclear risk |
| Incomplete outcome data (attrition bias)                  | Unclear risk |
| Selective reporting (reporting bias)                      | Unclear risk |
| Other bias                                                | Unclear risk |

## Milner 1989 78 79

**Methods** RCT (LCn3 vs nil) 6 months  
Summary risk of bias: medium or high

**Participants** People about to undergo angioplasty  
N:100 int., 100 control  
Level of risk for CVD: High  
Male: 74% int., 71% control  
Mean age, sd: 59 int., 59 control  
Age range: Unclear  
Smokers: 23% int., 28% control  
Hypertension: 43% int., 47% control  
Location: USA

**Interventions** Type: supplement (capsules)  
Intervention: Promega 9 capsules/d (4.5g EPA + DHA)  
Control: nil  
Compliance: 77% took 5-9 capsules/d, 11% took none (int. group)  
Length of intervention: 6 mo

**Outcomes** Main study outcome: restenosis  
Dropouts: all followed for outcomes  
Available outcomes: deaths, angina, side effects  
Response to contact: Yes

### Notes

### Risk of bias table

| Bias                                                      | Authors' judgement | Support for judgement                                                                                                                             |
|-----------------------------------------------------------|--------------------|---------------------------------------------------------------------------------------------------------------------------------------------------|
| Random sequence generation (selection bias)               | Low risk           | Computer generated list of random numbers                                                                                                         |
| Allocation concealment (selection bias)                   | Low risk           | Method of allocation unclear, though author has stated that allocation was after consent and that the researcher was not able to alter allocation |
| Blinding of participants and personnel (performance bias) | High risk          | Participants masked: No<br>Providers masked: Unclear                                                                                              |
| Blinding of outcome assessment (detection bias)           | Low risk           | Outcome assessors masked: Yes                                                                                                                     |
| Incomplete outcome data (attrition bias)                  | Low risk           | Full data set provided                                                                                                                            |
| Selective reporting (reporting bias)                      | Unclear risk       | No protocol found                                                                                                                                 |
| Other bias                                                | Low risk           | No further bias noted                                                                                                                             |

## NAT-1 Querques 2009 <sup>80 81</sup>

|                      |                                                                                                                                                                                                                                                                                                         |
|----------------------|---------------------------------------------------------------------------------------------------------------------------------------------------------------------------------------------------------------------------------------------------------------------------------------------------------|
| <b>Methods</b>       | RCT (LCn3 vs nil), 6 months<br>Summary risk of bias: moderate to high                                                                                                                                                                                                                                   |
| <b>Participants</b>  | People with age-related macular degeneration<br>N: 22 LCn3 int., 16 control<br>Level of risk for CVD: low<br>Location: France                                                                                                                                                                           |
| <b>Interventions</b> | Type: Supplement (capsules)<br>Comparison: LCn3 vs nil<br>Intervention: fish oil including EPA 720mg/d plus DHA 480mg/d, LCn3 overall 1.2g/d LCn3<br>Control: nil (no placebo)<br><b>PUFA Dose:</b> (intended) increase 0.5%E n-3, 0.5%E LCn3, 0% n-6, 0.5%E PUFA<br>Duration of intervention: 27 weeks |
| <b>Outcomes</b>      | Main study outcome: eye outcomes<br>Available outcomes: no side effects of drop-outs were observed, eye outcomes, authors reported no deaths, CVD events, diabetes or cancer diagnoses.<br>Response to contact: yes                                                                                     |

### Notes

### Risk of bias table

| Bias                                                      | Authors' judgement | Support for judgement |
|-----------------------------------------------------------|--------------------|-----------------------|
| Random sequence generation (selection bias)               | Unclear risk       |                       |
| Allocation concealment (selection bias)                   | Unclear risk       |                       |
| Blinding of participants and personnel (performance bias) | High risk          | No placebo            |
| Blinding of outcome assessment (detection bias)           | Unclear risk       |                       |
| Incomplete outcome data (attrition bias)                  | Unclear risk       |                       |
| Selective reporting (reporting bias)                      | Unclear risk       |                       |
| Other bias                                                | Unclear risk       |                       |

## Neubronner 2011 <sup>82-84</sup>

|                      |                                                                                                                                                                                                                                                                                                                                                                                                                       |
|----------------------|-----------------------------------------------------------------------------------------------------------------------------------------------------------------------------------------------------------------------------------------------------------------------------------------------------------------------------------------------------------------------------------------------------------------------|
| <b>Methods</b>       | RCT, 3 arms (LCn3 ethyl esters vs LCn3 triglycerides vs n6), 6 months<br>Summary risk of bias: not yet assessed                                                                                                                                                                                                                                                                                                       |
| <b>Participants</b>  | People with hyperlipidaemia treated with statins<br>N: 49 ethyl ester LCn3 int., 52 triglyceride LCn3, 49 n6 control<br>Level of risk for CVD: moderate<br>Location: Germany                                                                                                                                                                                                                                          |
| <b>Interventions</b> | Type: Supplement (capsules)<br>Comparison: LCn3 ethyl esters vs LCn3 triglycerides vs n6<br>Intervention: 4 gelatine coated soft capsules/d including 2.02g/d n6, 1.01 g/d EPA, 0.67g/d DHA (for both ethyl esters and triglycerides)<br>Control: 4 gelatine coated soft capsules/d of corn oil, n6<br><b>PUFA Dose:</b> (intended) increase 0.9%E n-3, 0.76%E LCn3, 0.9%E PUFA<br>Duration of intervention: 6 months |

**Outcomes** Main study outcome: omega 3 index  
 Available outcomes: RBC membrane fatty acid composition, omega 3 index, lipids (authors state that no deaths or CVD events, no cancer or diabetes diagnoses occurred during the trial except 1 fatal arrhythmia in the triglyceride LCn3 arm, and reported adverse effects).  
 Response to contact: yes

**Notes**

**Risk of bias table**

| Bias                                                      | Authors' judgement | Support for judgement |
|-----------------------------------------------------------|--------------------|-----------------------|
| Random sequence generation (selection bias)               | Unclear risk       |                       |
| Allocation concealment (selection bias)                   | Unclear risk       |                       |
| Blinding of participants and personnel (performance bias) | Unclear risk       |                       |
| Blinding of outcome assessment (detection bias)           | Unclear risk       |                       |
| Incomplete outcome data (attrition bias)                  | Unclear risk       |                       |
| Selective reporting (reporting bias)                      | Unclear risk       |                       |
| Other bias                                                | Unclear risk       |                       |

**Njike 2016** <sup>85</sup>

**Methods** RCT, 2x2 (ALA from walnuts vs nil), 6 months (other arm was assessing effects of reducing energy intake)  
 Summary risk of bias: not yet assessed

**Participants** Adults at risk of diabetes mellitus  
 N: ~66 ALA int., ~66 control  
 Level of risk for CVD: moderate  
 Location: USA

**Interventions** Type: Supplement (walnuts)  
 Comparison: ALA from walnuts vs nil  
 Intervention: 56g walnuts/d  
 Control: no walnuts  
**PUFA Dose:** (intended) increase unclear %E n-3, 0%E LCn3, unclear %E PUFA  
 Duration of intervention: 6 months

**Outcomes** Main study outcome: dietary patterns  
 Available outcomes: foods displaced by walnuts  
 Response to contact: not yet attempted

**Notes**

**Risk of bias table**

| Bias                                                      | Authors' judgement | Support for judgement |
|-----------------------------------------------------------|--------------------|-----------------------|
| Random sequence generation (selection bias)               | Unclear risk       |                       |
| Allocation concealment (selection bias)                   | Unclear risk       |                       |
| Blinding of participants and personnel (performance bias) | Unclear risk       |                       |

|                                                 |              |
|-------------------------------------------------|--------------|
| Blinding of outcome assessment (detection bias) | Unclear risk |
| Incomplete outcome data (attrition bias)        | Unclear risk |
| Selective reporting (reporting bias)            | Unclear risk |
| Other bias                                      | Unclear risk |

## Nostratzehi 2016 – IRCT 2015041620377N2 <sup>86</sup>

- Methods** RCT (n3 vs unclear placebo), 6 months  
Summary risk of bias: not yet assessed
- Participants** People with recurrent aphthous stomatitis  
N: 25 n3 int., 25 control  
Level of risk for CVD: low  
Location: Iran
- Interventions** Type: Supplement (capsules)  
Comparison: n3 vs unclear placebo  
Intervention: 3x1g omega 3 capsules/d  
Control: unclear placebo  
**PUFA Dose:** (intended) increase unclear %E n-3, unclear %E LCn3, unclear %E PUFA  
Duration of intervention: 6 months
- Outcomes** Main study outcome: ulcer recurrence and pain  
Available outcomes: ulcer recurrence and pain  
Response to contact: not yet attempted

### Notes

### Risk of bias table

| Bias                                                      | Authors' judgement | Support for judgement |
|-----------------------------------------------------------|--------------------|-----------------------|
| Random sequence generation (selection bias)               | Unclear risk       |                       |
| Allocation concealment (selection bias)                   | Unclear risk       |                       |
| Blinding of participants and personnel (performance bias) | Unclear risk       |                       |
| Blinding of outcome assessment (detection bias)           | Unclear risk       |                       |
| Incomplete outcome data (attrition bias)                  | Unclear risk       |                       |
| Selective reporting (reporting bias)                      | Unclear risk       |                       |
| Other bias                                                | Unclear risk       |                       |

## Oliwiecki 1994 <sup>87</sup>

- Methods** RCT (total PUFA - LCn3 & n6 vs non-fat), 6 months  
Summary risk of bias: not yet assessed
- Participants** People with chronic stable plaque psoriasis  
N: ~18 int., ~18 control (37 in total)  
Level of risk for CVD: low  
Location: UK
- Interventions** Type: Supplement (capsules)



Comparison: total PUFA vs non-fat  
Intervention: 12 capsules/d with each capsule including 430mg evening primrose oil plus 107mg fish oil  
Control: 12 capsules/d liquid paraffin  
**PUFA Dose:** (intended) increase unclear %E n-3, unclear %E LCn3, unclear % n-6, unclear %E PUFA  
Duration of intervention: 24 weeks

**Outcomes** Main study outcome: clinical assessment of psoriasis  
Available outcomes: observer and patient clinical assessment (including itch, redness, anxiety and depression), plaque thickness, trans-epidermal water loss,  
Response to contact: not yet attempted

## Notes

## Risk of bias table

| Bias                                                      | Authors' judgement | Support for judgement |
|-----------------------------------------------------------|--------------------|-----------------------|
| Random sequence generation (selection bias)               | Unclear risk       |                       |
| Allocation concealment (selection bias)                   | Unclear risk       |                       |
| Blinding of participants and personnel (performance bias) | Unclear risk       |                       |
| Blinding of outcome assessment (detection bias)           | Unclear risk       |                       |
| Incomplete outcome data (attrition bias)                  | Unclear risk       |                       |
| Selective reporting (reporting bias)                      | Unclear risk       |                       |
| Other bias                                                | Unclear risk       |                       |

## Palozza 1996 <sup>88</sup>

**Methods** RCT, 4 arms (EPA + DHA at 3 doses vs usual fat), 6 months  
Summary risk of bias: moderate to high

**Participants** Healthy adults  
N: 10 high LCn3 int., 10 moderate, 10 low LCn3 intake, 10 control  
Level of risk for CVD: low  
Location: Italy

**Interventions** Type: supplementary capsules  
Comparison: LCn3 vs usual fat  
Intervention: high dose 9 capsules/d of 455mg EPA + 395mg DHA (4.1g/d EPA, 3.6g/d DHA), moderate dose 6 capsules/d of 455mg EPA + 395mg DHA (2.7g/d EPA, 2.4g/d DHA) + 3 usual fat capsules, low dose 3 capsules/d of 455mg EPA + 395mg DHA (1.4g/d EPA, 1.2g/d DHA) + 6 usual fat capsules.  
Control: fats similar in balance to usual Italian diet, 9/day  
**PUFA Dose:** (intended) increase high dose **3.5%E n-3, 3.5%E LCn3, unclear %E PUFA, moderate** dose **2.3%E n-3, 2.3%E LCn3, unclear %E PUFA, low** dose **1.2%E n-3, 1.2%E LCn3, unclear %E PUFA,**  
Duration of intervention: 180 days

**Outcomes** Main study outcome: lipid peroxidation  
Available outcomes: malondialdehyde  
Response to contact: not yet attempted

**Notes**

## Risk of bias table

| Bias                                                      | Authors' judgement | Support for judgement                                      |
|-----------------------------------------------------------|--------------------|------------------------------------------------------------|
| Random sequence generation (selection bias)               | Unclear risk       | "subjects were randomly assigned" - no methods provided    |
| Allocation concealment (selection bias)                   | Unclear risk       | no methods described                                       |
| Blinding of participants and personnel (performance bias) | Low risk           | "double blind" stated and all participants took 9 capsules |
| Blinding of outcome assessment (detection bias)           | Unclear risk       | unclear                                                    |
| Incomplete outcome data (attrition bias)                  | Unclear risk       |                                                            |
| Selective reporting (reporting bias)                      | Unclear risk       |                                                            |
| Other bias                                                | Unclear risk       |                                                            |

## Parulkar 2009 <sup>89</sup>

|                      |                                                                                                                                                                                                                                                                                 |
|----------------------|---------------------------------------------------------------------------------------------------------------------------------------------------------------------------------------------------------------------------------------------------------------------------------|
| <b>Methods</b>       | RCT (n3 vs placebo), 6.5 months (other intervention increases polyphenols)<br>Summary risk of bias: not yet assessed                                                                                                                                                            |
| <b>Participants</b>  | People with chronic periodontitis<br>N: ~32 n3 int., ~32 control (65 in total)<br>Level of risk for CVD: low<br>Location: unclear                                                                                                                                               |
| <b>Interventions</b> | Type: Supplement (capsules)<br>Comparison: n3 vs placebo<br>Intervention: 3g/d n3 (no further details)<br>Control: placebo (no further details)<br><b>PUFA Dose:</b> (intended) increase unclear %E n-3, unclear %E LCn3, unclear %E PUFA<br>Duration of intervention: 28 weeks |
| <b>Outcomes</b>      | Main study outcome: measures of periodontitis<br>Available outcomes: pocket depth, bleeding, attachment loss, plaque index<br>Response to contact: not yet attempted                                                                                                            |
| <b>Notes</b>         | Note: abstract only                                                                                                                                                                                                                                                             |

## Risk of bias table

| Bias                                                      | Authors' judgement | Support for judgement |
|-----------------------------------------------------------|--------------------|-----------------------|
| Random sequence generation (selection bias)               | Unclear risk       |                       |
| Allocation concealment (selection bias)                   | Unclear risk       |                       |
| Blinding of participants and personnel (performance bias) | Unclear risk       |                       |
| Blinding of outcome assessment (detection bias)           | Unclear risk       |                       |
| Incomplete outcome data (attrition bias)                  | Unclear risk       |                       |
| Selective reporting (reporting bias)                      | Unclear risk       |                       |
| Other bias                                                | Unclear risk       |                       |

## PEACH - Urakawa 2014 <sup>90</sup>

|                      |                                                                                                                                                                                                                                                                          |
|----------------------|--------------------------------------------------------------------------------------------------------------------------------------------------------------------------------------------------------------------------------------------------------------------------|
| <b>Methods</b>       | RCT (LCn3 vs nil, both with pitavastatin), 12 months (also higher dose statin arm)<br>Summary risk of bias: not yet assessed                                                                                                                                             |
| <b>Participants</b>  | People with no atherosclerotic cardiovascular disease, but needing statin<br>N: 68 LCn3 int., 64 control<br>Level of risk for CVD: moderate<br>Location: Japan                                                                                                           |
| <b>Interventions</b> | Type: Supplement assumed<br>Comparison: LCn3 vs nil<br>Intervention: 1.8g/d EPA with 2mg/d pitavastatin<br>Control: nil with 2mg/d pitavastatin<br><b>PUFA Dose:</b> (intended) increase 1%E n-3, 1%E LCn3, -0.3% n-6, 0.7%E PUFA<br>Duration of intervention: 12 months |
| <b>Outcomes</b>      | Main study outcome: coronary artery calcification<br>Available outcomes: calcification, lipids<br>Response to contact: not yet attempted                                                                                                                                 |
| <b>Notes</b>         | Note: abstract only                                                                                                                                                                                                                                                      |

### Risk of bias table

| Bias                                                      | Authors' judgement | Support for judgement |
|-----------------------------------------------------------|--------------------|-----------------------|
| Random sequence generation (selection bias)               | Unclear risk       |                       |
| Allocation concealment (selection bias)                   | Unclear risk       |                       |
| Blinding of participants and personnel (performance bias) | Unclear risk       |                       |
| Blinding of outcome assessment (detection bias)           | Unclear risk       |                       |
| Incomplete outcome data (attrition bias)                  | Unclear risk       |                       |
| Selective reporting (reporting bias)                      | Unclear risk       |                       |
| Other bias                                                | Unclear risk       |                       |

## Pinheiro 2007 <sup>91 92</sup>

|                      |                                                                                                                                                                                                                                                                                                                     |
|----------------------|---------------------------------------------------------------------------------------------------------------------------------------------------------------------------------------------------------------------------------------------------------------------------------------------------------------------|
| <b>Methods</b>       | RCT, 3 arms (ALA at 2 doses vs placebo), 6 months<br>Summary risk of bias: not yet assessed                                                                                                                                                                                                                         |
| <b>Participants</b>  | People with rheumatoid arthritis or lupus and keratocconjunctivitis sicca and Sjogren's syndrome<br>N: 12 high ALA int., 13 low ALA int, 13 control<br>Level of risk for CVD: low<br>Location: Brazil                                                                                                               |
| <b>Interventions</b> | Type: Supplement (capsules)<br>Comparison: ALA at 2 doses vs placebo<br>Intervention: 2g/d flaxseed oil capsules, or 1g/d flaxseed oil capsules<br>Control: unclear placebo<br><b>PUFA Dose:</b> (intended) increase unclear %E n-3, 0%E LCn3, unclear % n-6, unclear %E PUFA<br>Duration of intervention: 180 days |

**Outcomes** Main study outcome: eye outcomes  
 Available outcomes: symptoms, ocular surface inflammation, fluorescein break-up time, Schirmer test (authors stated that no participants experienced any CVD events)  
 Response to contact: yes

**Notes**

**Risk of bias table**

| Bias                                                      | Authors' judgement | Support for judgement |
|-----------------------------------------------------------|--------------------|-----------------------|
| Random sequence generation (selection bias)               | Unclear risk       |                       |
| Allocation concealment (selection bias)                   | Unclear risk       |                       |
| Blinding of participants and personnel (performance bias) | Unclear risk       |                       |
| Blinding of outcome assessment (detection bias)           | Unclear risk       |                       |
| Incomplete outcome data (attrition bias)                  | Unclear risk       |                       |
| Selective reporting (reporting bias)                      | Unclear risk       |                       |
| Other bias                                                | Unclear risk       |                       |

**Pinna 2007 <sup>93</sup>**

**Methods** RCT, 3 groups (n6 vs nil), 6 months (final group was n6 alone, n6 + eyelid hygiene was used for this comparison)  
 Summary risk of bias: not yet assessed

**Participants** People with meibomian gland dysfunction  
 N: 19 n6 int., 19 control  
 Level of risk for CVD: low  
 Location: Italy

**Interventions** Type: Supplement (capsules)  
 Comparison: n6 vs nil  
 Intervention: group C, 15mg GLA + 28.5mg LA with eyelid hygiene  
 Control: eyelid hygiene alone  
**PUFA Dose:** (intended) increase 0%E n-3, 0%E LCn3, 0.2% n-6, 0.2%E PUFA  
 Duration of intervention: 180 days

**Outcomes** Main study outcome: ocular surface disorder  
 Available outcomes: eyelid oedema, self evaluation questionnaire, slit-lamp examination (and many other eye assessments)  
 Response to contact: not yet attempted

**Notes**

**Risk of bias table**

| Bias                                                      | Authors' judgement | Support for judgement |
|-----------------------------------------------------------|--------------------|-----------------------|
| Random sequence generation (selection bias)               | Unclear risk       |                       |
| Allocation concealment (selection bias)                   | Unclear risk       |                       |
| Blinding of participants and personnel (performance bias) | Unclear risk       |                       |

|                                                 |              |
|-------------------------------------------------|--------------|
| Blinding of outcome assessment (detection bias) | Unclear risk |
| Incomplete outcome data (attrition bias)        | Unclear risk |
| Selective reporting (reporting bias)            | Unclear risk |
| Other bias                                      | Unclear risk |

## Purewal 1997 <sup>94</sup>

|                      |                                                                                                                                                                                                                                                                                                                                                                                                                                                                                                                           |
|----------------------|---------------------------------------------------------------------------------------------------------------------------------------------------------------------------------------------------------------------------------------------------------------------------------------------------------------------------------------------------------------------------------------------------------------------------------------------------------------------------------------------------------------------------|
| <b>Methods</b>       | RCT, parallel, (n6 GLA vs unclear placebo), 12 months<br>Summary risk of bias: Moderate or high                                                                                                                                                                                                                                                                                                                                                                                                                           |
| <b>Participants</b>  | People with diabetes and painful neuropathy<br>N: 26 int., 25 control. (analysed unclear)<br>Level of risk for CVD: moderate<br>Male: NR% int., NR% control.<br>Mean age (sd): 64.6 (7.8) int., 60.5 (10.1) control<br>Age range: NR<br>Smokers: NR<br>Hypertension: NR<br>Medications taken by at least 50% of those in the control group: NR<br>Medications taken by 20-49% of those in the control group: NR<br>Medications taken by some, but less than 20% of the control group: NR<br>Location: UK<br>Ethnicity: NR |
| <b>Interventions</b> | Type: supplement (probably capsules)<br>Comparison: GLA vs unclear placebo<br>Intervention: 480mg/d GLA<br>Control: "placebo", no dose or type described<br><b>PUFA Dose:</b> (intended) increase 0%E n-3, 0.2%E n6, 0.2%E PUFA<br>Compliance: no details provided<br>Duration of intervention: states trial is 24 months duration, results provided for 12 months                                                                                                                                                        |
| <b>Outcomes</b>      | Main study outcome: measures neuropathic pain<br>Dropouts: unclear int., unclear control<br>Available outcomes: progression of neuropathy including vibration perception threshold, Valsalva ratio, RR interval, heart rate change on standing, postural hypotension<br>Response to contact: not yet attempted                                                                                                                                                                                                            |
| <b>Notes</b>         | Study funding: not stated<br>Note: abstract only found                                                                                                                                                                                                                                                                                                                                                                                                                                                                    |

### Risk of bias table

| Bias                                                      | Authors' judgement | Support for judgement                           |
|-----------------------------------------------------------|--------------------|-------------------------------------------------|
| Random sequence generation (selection bias)               | Unclear risk       | Paper states "randomised", no further details   |
| Allocation concealment (selection bias)                   | Unclear risk       | No details of allocation                        |
| Blinding of participants and personnel (performance bias) | Unclear risk       | Paper states "double blind", no further details |
| Blinding of outcome assessment (detection bias)           | Unclear risk       | No details provided                             |
| Incomplete outcome data (attrition bias)                  | Unclear risk       | Attrition unclear                               |
| Selective reporting (reporting bias)                      | Unclear risk       | No protocol or trials registry entry found      |
| Attention                                                 | Unclear risk       | Unclear, no details provided                    |
| Compliance                                                | Unclear risk       | Unclear, no details provided                    |

Other bias

Low risk

None noted

## Puri 2002 <sup>95 96</sup>

|                      |                                                                                                                                                                                                                                                                                 |
|----------------------|---------------------------------------------------------------------------------------------------------------------------------------------------------------------------------------------------------------------------------------------------------------------------------|
| <b>Methods</b>       | RCT, parallel (ethyl-EPA vs non-fat), 2 arm, 6 months<br>Summary risk of bias: not yet assessed                                                                                                                                                                                 |
| <b>Participants</b>  | People with Huntington's Disease<br>N: 4 intervention, 4 control<br>Level of risk for CVD: low<br>Location: UK                                                                                                                                                                  |
| <b>Interventions</b> | Type: supplement (capsules of ethyl-EPA)<br>Comparison: EPA vs non-fat<br>Intervention: 2g/d ethyl-EPA, 1.9 g/d EPA<br>Control: capsules of liquid paraffin<br><b>PUFA Dose:</b> (intended) increase 0.86%E n-3, 0.86%E LCn3, 0.86%E PUFA<br>Duration of intervention: 6 months |
| <b>Outcomes</b>      | Main study outcome: Huntington's disease severity<br>Available outcomes: Unified Huntington's Disease Rating Scale, MRI brain scans (1 death in control group before intervention began)<br>Response to contact: yes, no additional data provided                               |
| <b>Notes</b>         |                                                                                                                                                                                                                                                                                 |

### Risk of bias table

| Bias                                                      | Authors' judgement | Support for judgement |
|-----------------------------------------------------------|--------------------|-----------------------|
| Random sequence generation (selection bias)               | Unclear risk       |                       |
| Allocation concealment (selection bias)                   | Unclear risk       |                       |
| Blinding of participants and personnel (performance bias) | Unclear risk       |                       |
| Blinding of outcome assessment (detection bias)           | Unclear risk       |                       |
| Incomplete outcome data (attrition bias)                  | Unclear risk       |                       |
| Selective reporting (reporting bias)                      | Unclear risk       |                       |
| Other bias                                                | Unclear risk       |                       |

## Reis 1991 <sup>97-102</sup>

|                     |                                                                                                                                                                                                                     |
|---------------------|---------------------------------------------------------------------------------------------------------------------------------------------------------------------------------------------------------------------|
| <b>Methods</b>      | RCT (LCn3 vs MUFA) 6 months<br>Summary risk of bias: low                                                                                                                                                            |
| <b>Participants</b> | People undergoing angioplasty<br>N: 146 int., 72 control<br>Level of risk for CVD: High<br>Male: 73% int., 76% control<br>Mean age, sd: 60 int., 57 control<br>Age range: Unclear<br>Smokers: 31% int., 27% control |

Hypertension: Unclear  
Location: USA

**Interventions** Type: supplement (capsules)  
Intervention: Super EPA capsules 12x1 g/d (7.0g EPA + DHA + ALA) OR Promega capsules 12x1 g/d (6.0g EPA + DHA + ALA)  
Control: olive oil capsules, 12x1 g/d, appearance identical to fish oil capsules  
Compliance: capsule counts, >75% of capsules taken by 66% int., 65% controls, plasma EPA rose from 0.7% total fatty acids to 4.5% at 6 mo in the int. group, 0.7% in controls  
Length of intervention: 6 mo

**Outcomes** Main study outcome: restenosis, angina  
Dropouts: 22 int, 10 control  
Available outcomes: deaths, MI, CV events, weight, lipids, side effects  
Response to contact: Yes

## Notes

### Risk of bias table

| Bias                                                      | Authors' judgement | Support for judgement                                                             |
|-----------------------------------------------------------|--------------------|-----------------------------------------------------------------------------------|
| Random sequence generation (selection bias)               | Low risk           | Random numbers were produced and stratified by an independent statistician        |
| Allocation concealment (selection bias)                   | Low risk           | Co-ordinator enrolled patients and then called statistician for allocation number |
| Blinding of participants and personnel (performance bias) | Low risk           | Participants masked: Yes<br>Providers masked: Yes                                 |
| Blinding of outcome assessment (detection bias)           | Low risk           | Outcome assessors masked: Yes                                                     |
| Incomplete outcome data (attrition bias)                  | Low risk           | All drop-outs left the study in the first week                                    |
| Selective reporting (reporting bias)                      | Unclear risk       | No study protocol found                                                           |
| Other bias                                                | Low risk           | No further bias noted                                                             |

## Rezapour-Firouzi 2013 103-107

**Methods** RCT, 3 arms (total PUFA - ALA & GLA vs MUFA), 6 months (other intervention arm delivers "hot diet")  
Summary risk of bias: not yet assessed

**Participants** People with multiple sclerosis (MS)  
N: 33 total PUFA int., 33 MUFA control  
Level of risk for CVD: low  
Location: Iran

**Interventions** Type: supplementary (capsules or oils?)  
Comparison: total PUFA inc ALA & GLA vs MUFA  
Intervention: 18-21g/d hemp seed and evening primrose oil. Hemp seed oil is approx 55% LA, 22% ALA, 1-4% GLA. EPO is high in GLA.  
Control: 18-21g/d olive oil.  
**PUFA Dose:** (intended) increase unclear% E n-3, 0% E LCn3, unclear% n-6, 9% E PUFA  
Duration of intervention: 6 months

**Outcomes** Main study outcome: MS progression and relapse  
Available outcomes: disability (EDSS) and function, immunology (IL-4, IL-17 and IFN-gamma), delta-6-desaturase, serum phospholipase A2, liver function tests (AST, ALT, GGT)  
Response to contact: not yet attempted

## Notes

### Risk of bias table

| Bias                                                      | Authors' judgement | Support for judgement |
|-----------------------------------------------------------|--------------------|-----------------------|
| Random sequence generation (selection bias)               | Unclear risk       |                       |
| Allocation concealment (selection bias)                   | Unclear risk       |                       |
| Blinding of participants and personnel (performance bias) | Unclear risk       |                       |
| Blinding of outcome assessment (detection bias)           | Unclear risk       |                       |
| Incomplete outcome data (attrition bias)                  | Unclear risk       |                       |
| Selective reporting (reporting bias)                      | Unclear risk       |                       |
| Other bias                                                | Unclear risk       |                       |

## Rocha Filho 2011 <sup>108</sup>

- Methods** RCT, 3 arms (n6 at 2 doses vs non-fat), 6 months  
Summary risk of bias: not yet assessed
- Participants** Women experiencing pre-menstrual syndrome  
N: 40 high n6 int., 40 low n6 int, 40 control  
Level of risk for CVD: low  
Location: Brazil
- Interventions** Type: Supplement (capsules)  
Comparison: n6 higher dose vs n6 lower dose vs non-fat placebo  
Intervention: high dose: 30x 1g capsules/d each including 0.21g GLA, 0.35gLA, 0.25g other PUFA, total 16.65g/d n6, total 24.15g/d PUFA  
low dose: 15x 1g capsules/d each including 0.21g GLA, 0.35gLA, 0.25g other PUFA, total 8.3g/d n6, total 12.1g/d PUFA (plus 15 capsules of placebo)  
Control: 30x1g capsules/d mineral oil  
**PUFA Dose:** (intended) increase high dose 0%E n-3, 0%E LCn3, 7.5% n-6, 10.9%E PUFA, low dose 0%E n-3, 0%E LCn3, 3.8% n-6, 5.4%E PUFA  
Duration of intervention: 180 days
- Outcomes** Main study outcome: impact and severity of premenstrual symptoms  
Available outcomes: cholesterol, prolactin,  
Response to contact: not yet attempted

## Notes

### Risk of bias table

| Bias                                                      | Authors' judgement | Support for judgement |
|-----------------------------------------------------------|--------------------|-----------------------|
| Random sequence generation (selection bias)               | Unclear risk       |                       |
| Allocation concealment (selection bias)                   | Unclear risk       |                       |
| Blinding of participants and personnel (performance bias) | Unclear risk       |                       |
| Blinding of outcome assessment (detection bias)           | Unclear risk       |                       |



|                                          |              |
|------------------------------------------|--------------|
| Incomplete outcome data (attrition bias) | Unclear risk |
| Selective reporting (reporting bias)     | Unclear risk |
| Other bias                               | Unclear risk |

## Rodrigues 2015 <sup>109</sup>

|                      |                                                                                                                                                                                                                                                                                                                                             |
|----------------------|---------------------------------------------------------------------------------------------------------------------------------------------------------------------------------------------------------------------------------------------------------------------------------------------------------------------------------------------|
| <b>Methods</b>       | RCT (ALA & LCn3 vs unclear placebo), 6 months<br>Summary risk of bias: not yet assessed                                                                                                                                                                                                                                                     |
| <b>Participants</b>  | People with non-alcoholic steatohepatitis<br>N: 32 n3 int., 28 control<br>Level of risk for CVD: low<br>Location: Brazil                                                                                                                                                                                                                    |
| <b>Interventions</b> | Type: Supplements (capsules)<br>Comparison: ALA & LCn3 vs unclear placebo<br>Intervention: 945mg/d n3 (of which 64% 605mg/d ALA, 16% 151mg/d EPA, 21% 198mg/d DHA) within 3 capsules/d<br>Control: matching placebo<br><b>PUFA Dose:</b> (intended) increase <b>0.4%E n-3, 0.2%E LCn3, 0.4%E PUFA</b><br>Duration of intervention: 6 months |
| <b>Outcomes</b>      | Main study outcome: endoplasmic reticulum stress and mitochondrial dysfunction<br>Available outcomes: endoplasmic reticulum stress and mitochondrial dysfunction<br>Response to contact: not yet attempted                                                                                                                                  |
| <b>Notes</b>         | Note: abstract only                                                                                                                                                                                                                                                                                                                         |

### Risk of bias table

| Bias                                                      | Authors' judgement | Support for judgement |
|-----------------------------------------------------------|--------------------|-----------------------|
| Random sequence generation (selection bias)               | Unclear risk       |                       |
| Allocation concealment (selection bias)                   | Unclear risk       |                       |
| Blinding of participants and personnel (performance bias) | Unclear risk       |                       |
| Blinding of outcome assessment (detection bias)           | Unclear risk       |                       |
| Incomplete outcome data (attrition bias)                  | Unclear risk       |                       |
| Selective reporting (reporting bias)                      | Unclear risk       |                       |
| Other bias                                                | Unclear risk       |                       |

## Sabaté 2005 <sup>110-113</sup>

|                      |                                                                                                                           |
|----------------------|---------------------------------------------------------------------------------------------------------------------------|
| <b>Methods</b>       | RCT crossover (diet with walnuts ALA vs usual diet), 6 months crossover periods<br>Summary risk of bias: not yet assessed |
| <b>Participants</b>  | Healthy adults<br>N: 90 int., 90 control<br>Level of risk for CVD: low<br>Location: USA                                   |
| <b>Interventions</b> | Type: supplementary walnuts                                                                                               |

Comparison: usual diet plus walnuts vs usual diet  
 Intervention: usual diet plus walnuts to make up 12% E  
 Control: usual diet

**PUFA Dose:** (intended) increase unclear %E n-3, 0%E LCn3, unclear %E PUFA  
 Duration of intervention: 6 months

**Outcomes** Main study outcome: weight gain  
 Available outcomes: weight, BMI, body fat, fat free mass, Prostate specific antigen (PSA), nutrient intake. Authors report no deaths of CVD events, no diabetes or cancer diagnoses, but 1 hypothyroidism diagnosis in control arm  
 Response to contact: yes

## Notes

## Risk of bias table

| Bias                                                      | Authors' judgement | Support for judgement |
|-----------------------------------------------------------|--------------------|-----------------------|
| Random sequence generation (selection bias)               | Unclear risk       |                       |
| Allocation concealment (selection bias)                   | Unclear risk       |                       |
| Blinding of participants and personnel (performance bias) | Unclear risk       |                       |
| Blinding of outcome assessment (detection bias)           | Unclear risk       |                       |
| Incomplete outcome data (attrition bias)                  | Unclear risk       |                       |
| Selective reporting (reporting bias)                      | Unclear risk       |                       |
| Other bias                                                | Unclear risk       |                       |

## Safarinajad 2009 <sup>114-116</sup>

**Methods** RCT (LCn3 vs n6), 7.5 months  
 Summary risk of bias: moderate to high

**Participants** Infertile men  
 N: 119 LCn3 int., 119 control  
 Level of risk for CVD: low  
 Location: Iran

**Interventions** Type: Supplementation (capsules)  
 Comparison: LCn3 vs n6  
 Intervention: 1.84g/d EPA & DHA (EPAX 5500TG), in 4 capsules/d  
 Control: corn oil, 4 capsules/d  
**PUFA Dose:** (intended) increase 0.8%E n-3, 0.8%E LCn3, -0.8% n-6, unclear %E PUFA  
 Duration of intervention: 7.5 months

**Outcomes** Main study outcome: sperm quality  
 Available outcomes: sperm motility, sexual satisfaction (authors report no deaths or CVD events, diabetes or cancer diagnoses, also adverse events in both arms)  
 Response to contact: yes

## Notes

## Risk of bias table

| Bias | Authors' judgement | Support for judgement |
|------|--------------------|-----------------------|
|------|--------------------|-----------------------|

|                                                           |              |                                                                    |
|-----------------------------------------------------------|--------------|--------------------------------------------------------------------|
| Random sequence generation (selection bias)               | Low risk     | "randomised" - random permuted blocks                              |
| Allocation concealment (selection bias)                   | Low risk     | randomisation carried out by staff member blind to pre-assessments |
| Blinding of participants and personnel (performance bias) | Unclear risk | placebo provided, details unclear                                  |
| Blinding of outcome assessment (detection bias)           | Unclear risk | unclear                                                            |
| Incomplete outcome data (attrition bias)                  | Unclear risk |                                                                    |
| Selective reporting (reporting bias)                      | Unclear risk |                                                                    |
| Other bias                                                | Unclear risk |                                                                    |

## Sarkkinen 1998 <sup>117-122</sup>

|                      |                                                                                                                                                                                                                                                                                                                                                                                                                                                                                                                                                                                            |
|----------------------|--------------------------------------------------------------------------------------------------------------------------------------------------------------------------------------------------------------------------------------------------------------------------------------------------------------------------------------------------------------------------------------------------------------------------------------------------------------------------------------------------------------------------------------------------------------------------------------------|
| <b>Methods</b>       | RCT (ALA vs low fat) 6 months<br>Summary risk of bias: medium or high                                                                                                                                                                                                                                                                                                                                                                                                                                                                                                                      |
| <b>Participants</b>  | People with moderate hypercholesterolaemia<br>N: 41 int., 37 control<br>Level of risk for CVD: Moderate<br>Male: 46% int., 46% control<br>Mean age, sd: 46.4, 7.4 int., 43.2, 8.2 control<br>Age range: Unclear<br>Smokers: Unclear<br>Hypertension: Unclear<br>Location: Finland                                                                                                                                                                                                                                                                                                          |
| <b>Interventions</b> | Type: dietary advice and supplement (foods)<br>Intervention: Advised on diet providing 38% of energy as fat, 18% as MUFA, with rapeseed oil, rapeseed margarine and skimmed milk provided (achieved 42% E from fat, 12% from MUFA)<br>Control: Advised on diet providing 38% of energy as fat, 15% E from MUFA, with rapeseed oil, butter and semi-skimmed milk provided (achieved 36% E from fat, 10% from MUFA)<br>Compliance: weighed dietary intakes, omega-3 fats in plasma fatty acids rose from 3.5 to 3.8% at 6 mo int., from 3.3 to 3.6% control.<br>Length of intervention: 6 mo |
| <b>Outcomes</b>      | Main study outcome: lipids, diet, BP<br>Dropouts: None<br>Available outcomes: deaths, BMI, lipids<br>Response to contact: Yes                                                                                                                                                                                                                                                                                                                                                                                                                                                              |
| <b>Notes</b>         |                                                                                                                                                                                                                                                                                                                                                                                                                                                                                                                                                                                            |

### Risk of bias table

| Bias                                                      | Authors' judgement | Support for judgement                                                        |
|-----------------------------------------------------------|--------------------|------------------------------------------------------------------------------|
| Random sequence generation (selection bias)               | Low risk           | Stratified in blocks of 4, the order in blocks was from random number tables |
| Allocation concealment (selection bias)                   | Unclear risk       | Unclear                                                                      |
| Blinding of participants and personnel (performance bias) | High risk          | Participants masked: No<br>Providers masked: No                              |
| Blinding of outcome assessment (detection bias)           | Low risk           | Outcome assessors masked: Yes                                                |

|                                          |              |
|------------------------------------------|--------------|
| Incomplete outcome data (attrition bias) | Unclear risk |
| Selective reporting (reporting bias)     | Unclear risk |
| Other bias                               | Unclear risk |

## Schaefer 1996 <sup>123</sup>

|                      |                                                                                                                                                                                                                                                                                                                                                                                                            |
|----------------------|------------------------------------------------------------------------------------------------------------------------------------------------------------------------------------------------------------------------------------------------------------------------------------------------------------------------------------------------------------------------------------------------------------|
| <b>Methods</b>       | RCT (diet rich in LCn3 vs diet low in LCn3), 6 months<br>Summary risk of bias: not yet assessed                                                                                                                                                                                                                                                                                                            |
| <b>Participants</b>  | Middle aged and older adults<br>N: 11 high LCn3 int., 11 low LCn3 control<br>Level of risk for CVD: low<br>Location: USA                                                                                                                                                                                                                                                                                   |
| <b>Interventions</b> | Type: food provided by study to eat at home<br>Comparison: Step 2 diet rich in LCn3 vs step 2 diet low in LCn3<br>Intervention: NCEP step 2 diet with 8 weekly fish portions (including sole, tuna, salmon)<br>Control: NCEP step 2 diet with with 2 weekly fish portions<br><b>PUFA Dose:</b> (achieved) increase <b>0.5%E n-3, 0.6%E LCn3, 0% n-6, -0.2%E PUFA</b><br>Duration of intervention: 24 weeks |
| <b>Outcomes</b>      | Main study outcome: lipids<br>Available outcomes: lipids including VLDL, apoB, Lp(a), LDL particle size<br>Response to contact: not attempted                                                                                                                                                                                                                                                              |
| <b>Notes</b>         |                                                                                                                                                                                                                                                                                                                                                                                                            |

### Risk of bias table

| Bias                                                      | Authors' judgement | Support for judgement |
|-----------------------------------------------------------|--------------------|-----------------------|
| Random sequence generation (selection bias)               | Unclear risk       |                       |
| Allocation concealment (selection bias)                   | Unclear risk       |                       |
| Blinding of participants and personnel (performance bias) | Unclear risk       |                       |
| Blinding of outcome assessment (detection bias)           | Unclear risk       |                       |
| Incomplete outcome data (attrition bias)                  | Unclear risk       |                       |
| Selective reporting (reporting bias)                      | Unclear risk       |                       |
| Other bias                                                | Unclear risk       |                       |

## Selvais 1995 <sup>124-126</sup>

|                     |                                                                                                                                                                                                                                          |
|---------------------|------------------------------------------------------------------------------------------------------------------------------------------------------------------------------------------------------------------------------------------|
| <b>Methods</b>      | RCT (LCn3 vs unclear placebo) 9 months<br>Summary risk of bias: low                                                                                                                                                                      |
| <b>Participants</b> | People with insulin dependant diabetes and micro-albuminurea<br>N: 12 int., 12 control<br>Level of risk for CVD: Moderate<br>Male: 'comparable' between 2 groups<br>Mean age, sd: 'comparable'<br>Age range: Unclear<br>Smokers: Unclear |

Hypertension: Unclear  
Location: Belgium

**Interventions** Type: supplement (capsules) Intervention: omega-3 fatty acids (2.4g/d EPA + DHA)  
Control: 'inert placebo'  
Compliance: diet history, capsule count and fatty acid data (none provided)  
Length of intervention: 9 mo

**Outcomes** Main study outcome: immunoreactivity  
Dropouts: 4 int., 2 control  
Available outcomes: deaths, MI, CV events  
Response to contact: Yes

## Notes

## Risk of bias table

| Bias                                                      | Authors' judgement | Support for judgement                                                                                                                            |
|-----------------------------------------------------------|--------------------|--------------------------------------------------------------------------------------------------------------------------------------------------|
| Random sequence generation (selection bias)               | Low risk           | 'toss' by Sanofi, Belgium                                                                                                                        |
| Allocation concealment (selection bias)                   | Low risk           | Authors report that those recruiting participants were not aware of assignment, and that they could not alter allocation but no methods provided |
| Blinding of participants and personnel (performance bias) | Low risk           | Authors reported that participants and providers were masked                                                                                     |
| Blinding of outcome assessment (detection bias)           | Low risk           | Outcome assessors masked: Yes                                                                                                                    |
| Incomplete outcome data (attrition bias)                  | Unclear risk       |                                                                                                                                                  |
| Selective reporting (reporting bias)                      | Unclear risk       |                                                                                                                                                  |
| Other bias                                                | Unclear risk       |                                                                                                                                                  |

## Sheppard 2013 – NCT00883649<sup>127</sup>

**Methods** RCT (n3 - ALA & LCn3 vs n6), 6 months  
Summary risk of bias: not yet assessed

**Participants** People with keratoconjunctivitis Sicca  
N: 19 n3 int., 19 control  
Level of risk for CVD: low  
Location: USA

**Interventions** Type: Supplement (capsules)  
Comparison: n3 vs n6  
Intervention: 4 softgel capsules/d, including 196mg/d ALA, 126mg/d EPA, 99mg/d DHA, 264mg/d LCn3, 710mg/d LA, 240mg/d GLA, 950mg/d n6  
Control: 4 softgel capsules, of sunflower oil  
**PUFA Dose:** (intended) increase **0.2%E n-3, 0.1%E LCn3, unclear E PUFA**  
Duration of intervention: 6 months

**Outcomes** Main study outcome: eye symptoms  
Available outcomes: Ocular Surface Disease Index (OSDI), symptom severity, tear flow, corneal staining, conjunctival impression cytology, artificial tear usage, facial expression discomfort, surface regularity and asymmetry, inflammation, intraocular pressure  
Response to contact: not yet attempted

## Notes

## Risk of bias table

| Bias                                                      | Authors' judgement | Support for judgement |
|-----------------------------------------------------------|--------------------|-----------------------|
| Random sequence generation (selection bias)               | Unclear risk       |                       |
| Allocation concealment (selection bias)                   | Unclear risk       |                       |
| Blinding of participants and personnel (performance bias) | Unclear risk       |                       |
| Blinding of outcome assessment (detection bias)           | Unclear risk       |                       |
| Incomplete outcome data (attrition bias)                  | Unclear risk       |                       |
| Selective reporting (reporting bias)                      | Unclear risk       |                       |
| Other bias                                                | Unclear risk       |                       |

## Shevelyok 2013 <sup>128</sup>

|                      |                                                                                                                                                                                                                                                                                                      |
|----------------------|------------------------------------------------------------------------------------------------------------------------------------------------------------------------------------------------------------------------------------------------------------------------------------------------------|
| <b>Methods</b>       | RCT (unclear n3 vs unclear control), 6 months<br>Summary risk of bias: not yet assessed                                                                                                                                                                                                              |
| <b>Participants</b>  | People with paroxysmal atrial fibrillation (AF)<br>N: 30 n3 int., 41 control<br>Level of risk for CVD: high<br>Location: unclear                                                                                                                                                                     |
| <b>Interventions</b> | Type: Supplements (capsules?)<br>Comparison: n3 vs unclear control<br>Intervention: omega-3, type and dose unclear<br>Control: unclear control<br><b>PUFA Dose:</b> (intended) increase <b>unclear %E n-3, unclear %E LCn3, unclear % n-6, unclear %E PUFA</b><br>Duration of intervention: 6 months |
| <b>Outcomes</b>      | Main study outcome: atrial late potentials<br>Available outcomes: AF recurrence<br>Response to contact: not yet attempted                                                                                                                                                                            |
| <b>Notes</b>         | Note: abstract only                                                                                                                                                                                                                                                                                  |

### Risk of bias table

| Bias                                                      | Authors' judgement | Support for judgement |
|-----------------------------------------------------------|--------------------|-----------------------|
| Random sequence generation (selection bias)               | Unclear risk       |                       |
| Allocation concealment (selection bias)                   | Unclear risk       |                       |
| Blinding of participants and personnel (performance bias) | Unclear risk       |                       |
| Blinding of outcome assessment (detection bias)           | Unclear risk       |                       |
| Incomplete outcome data (attrition bias)                  | Unclear risk       |                       |
| Selective reporting (reporting bias)                      | Unclear risk       |                       |
| Other bias                                                | Unclear risk       |                       |

## Singer 2004 <sup>129</sup>

|                      |                                                                                                                                                                                                                                                                                  |
|----------------------|----------------------------------------------------------------------------------------------------------------------------------------------------------------------------------------------------------------------------------------------------------------------------------|
| <b>Methods</b>       | RCT (LCn3 vs MUFA), 6 months<br>Summary risk of bias: not yet assessed                                                                                                                                                                                                           |
| <b>Participants</b>  | People with cardiac arrhythmia but without CHD or heart failure<br>N: 33 LCn3 int., 32 control<br>Level of risk for CVD: high<br>Location: Germany                                                                                                                               |
| <b>Interventions</b> | Type: Supplemental capsules<br>Comparison: fish oil LCn3 vs olive oil<br>Intervention: 3g/d fish oil including 1g/d LCn3<br>Control: 3g/d olive oil<br><b>PUFA Dose:</b> (intended) increase <b>0.5%E n-3, 0.5%E LCn3, unclear %E PUFA</b><br>Duration of intervention: 6 months |
| <b>Outcomes</b>      | Main study outcome: cardiac arrhythmia<br>Available outcomes: lipids, blood pressure, body weight, TXB2<br>Response to contact: not yet attempted                                                                                                                                |
| <b>Notes</b>         |                                                                                                                                                                                                                                                                                  |

### Risk of bias table

| Bias                                                      | Authors' judgement | Support for judgement |
|-----------------------------------------------------------|--------------------|-----------------------|
| Random sequence generation (selection bias)               | Unclear risk       |                       |
| Allocation concealment (selection bias)                   | Unclear risk       |                       |
| Blinding of participants and personnel (performance bias) | Unclear risk       |                       |
| Blinding of outcome assessment (detection bias)           | Unclear risk       |                       |
| Incomplete outcome data (attrition bias)                  | Unclear risk       |                       |
| Selective reporting (reporting bias)                      | Unclear risk       |                       |
| Other bias                                                | Unclear risk       |                       |

## Slack 1987 <sup>130</sup>

|                      |                                                                                                                                                                                                                                                            |
|----------------------|------------------------------------------------------------------------------------------------------------------------------------------------------------------------------------------------------------------------------------------------------------|
| <b>Methods</b>       | RCT (LCn3 vs nil), 6 months<br>Summary risk of bias: moderate to high                                                                                                                                                                                      |
| <b>Participants</b>  | Adults undergoing PTCA<br>N: 80 LCn3 int., 82 control<br>Level of risk for CVD: moderatehigh<br>Location: USA                                                                                                                                              |
| <b>Interventions</b> | Type: supplementary capsules<br>Comparison: EPA capsules vs nil<br>Intervention: 6-9 capsules/d MaxEPA<br>Control: nil<br><b>PUFA Dose:</b> (intended) increase of <b>%E n-3, %E LCn3, % n-6, %E PUFA not stated</b><br>Duration of intervention: 6 months |
| <b>Outcomes</b>      | Main study outcome: restenosis<br>Available outcomes: none (cholesterol, TG, HDL reported for intervention but not control)<br>Response to contact: not attempted                                                                                          |
| <b>Notes</b>         |                                                                                                                                                                                                                                                            |

## Risk of bias table

| Bias                                                      | Authors' judgement | Support for judgement                    |
|-----------------------------------------------------------|--------------------|------------------------------------------|
| Random sequence generation (selection bias)               | Unclear risk       | "randomly assigned" - no method provided |
| Allocation concealment (selection bias)                   | Unclear risk       | unclear, no method provided              |
| Blinding of participants and personnel (performance bias) | High risk          | no placebo                               |
| Blinding of outcome assessment (detection bias)           | Unclear risk       | unclear                                  |
| Incomplete outcome data (attrition bias)                  | Unclear risk       |                                          |
| Selective reporting (reporting bias)                      | Unclear risk       |                                          |
| Other bias                                                | Unclear risk       |                                          |

## Stainforth 1996 <sup>131</sup>

- Methods** RCT (total PUFA - GLA & LCn3 vs n6), 6 months  
Summary risk of bias: not yet assessed
- Participants** People with systemic sclerosis  
N: 13 int., 12 control  
Level of risk for CVD: low  
Location: UK
- Interventions** Type: Supplements (capsules)  
Comparison: total PUFA (GLA & LCn3) vs n6  
Intervention: evening primrose oil and fish oil, 6 capsules/d including 1.62g/d GLA plus LCn3 (dose unclear)  
Control: 500mg/capsule sunflower oil, 6 capsules/d, 3g/d sunflower oil  
**PUFA Dose:** (intended) increase unclear %E n-3, unclear %E LCn3, -0.45% n-6, unclear %E PUFA  
Duration of intervention: 6 months
- Outcomes** Main study outcome: unclear  
Available outcomes: blood flow, ulcers, subjective assessment  
Response to contact: not yet attempted
- Notes**

## Risk of bias table

| Bias                                                      | Authors' judgement | Support for judgement |
|-----------------------------------------------------------|--------------------|-----------------------|
| Random sequence generation (selection bias)               | Unclear risk       |                       |
| Allocation concealment (selection bias)                   | Unclear risk       |                       |
| Blinding of participants and personnel (performance bias) | Unclear risk       |                       |
| Blinding of outcome assessment (detection bias)           | Unclear risk       |                       |
| Incomplete outcome data (attrition bias)                  | Unclear risk       |                       |
| Selective reporting (reporting bias)                      | Unclear risk       |                       |



Other bias

Unclear risk

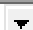

## Tani 2013 <sup>132</sup>

- Methods** RCT (LCn3 vs nil), 6 months  
Summary risk of bias: moderate to high
- Participants** People with raised triglycerides (TG)  
N: 72 LCn3 int., 72 control  
Level of risk for CVD: moderate  
Location: Japan
- Interventions** Type: Supplement (capsules)  
Comparison: LCn3 vs nil  
Intervention: 1.8g/d EPA (highly purified, Mochida)  
Control: nil  
**PUFA Dose:** (intended) increase 0.8%E n-3, 0.8%E LCn3, 0.8%E PUFA  
Duration of intervention: 6 months
- Outcomes** Main study outcome: LDL particle size  
Available outcomes: lipids  
Response to contact: not yet attempted
- Notes**

### Risk of bias table

| Bias                                                      | Authors' judgement | Support for judgement |
|-----------------------------------------------------------|--------------------|-----------------------|
| Random sequence generation (selection bias)               | Unclear risk       |                       |
| Allocation concealment (selection bias)                   | Unclear risk       |                       |
| Blinding of participants and personnel (performance bias) | High risk          | no placebo            |
| Blinding of outcome assessment (detection bias)           | Unclear risk       |                       |
| Incomplete outcome data (attrition bias)                  | Unclear risk       |                       |
| Selective reporting (reporting bias)                      | Unclear risk       |                       |
| Other bias                                                | Unclear risk       |                       |

## Theander 2002 <sup>133</sup>

- Methods** RCT, 3 arms (GLA high dose vs GLA low dose), 6 months (3rd arm increased corn oil n6, not included here)  
Summary risk of bias: not yet assessed
- Participants** People with Sjogren's syndrome  
N: 30 high GLA int., 30 low GLA, 30 control  
Level of risk for CVD: low  
Location: Sweden
- Interventions** Type: Supplemental (emulsions?)  
Comparison: high GLA vs low GLA vs n6  
Intervention: 1.6g/d GLA vs 0.8g/d GLA  
Control: corn oil emulsion, mainly n6  
**PUFA Dose:** (intended) increase 0.7%E GLA high, 0.4%E GLA low (increase 0.3%E GLA)  
Duration of intervention: 6 months

**Outcomes** Main study outcome: fatigue  
 Available outcomes: fatigue, sleeping time, eyesight (Shirmer), eye and mouth dryness, muscle pain, hand and finger pain, depression, medication, blood cell count, platelet count, creatinin, ESR, CRP, immunoglobulin, lymphocyte subpopulations  
 Response to contact: not yet attempted

**Notes**

**Risk of bias table**

| Bias                                                      | Authors' judgement | Support for judgement |
|-----------------------------------------------------------|--------------------|-----------------------|
| Random sequence generation (selection bias)               | Unclear risk       |                       |
| Allocation concealment (selection bias)                   | Unclear risk       |                       |
| Blinding of participants and personnel (performance bias) | Unclear risk       |                       |
| Blinding of outcome assessment (detection bias)           | Unclear risk       |                       |
| Incomplete outcome data (attrition bias)                  | Unclear risk       |                       |
| Selective reporting (reporting bias)                      | Unclear risk       |                       |
| Other bias                                                | Unclear risk       |                       |

**Thien 1993** 134 135

**Methods** RCT (LCn3 vs MUFA) 6 months  
 Summary risk of bias: low

**Participants** People with hayfever and asthma  
 N: 21 int., 16 control  
 Level of risk for CVD: Low  
 Male: 60% int., 40% control  
 Mean age, sd: Unclear  
 Age range: 22-42 int., 19-39 control  
 Smokers: None  
 Hypertension: Unclear  
 Location: Australia

**Interventions** Type: supplement (capsule)  
 Intervention: MaxEPA capsules, 18/d (5.4g/d EPA + DHA)  
 Control: olive oil capsules 18/d, appeared identical to MaxEPA  
 Compliance: plasma fatty acids, EPA rose from 1.4 to 5.4% fatty acids at 6 mo in int group, and fell from 1.1 to 0.8% in control group  
 Length of intervention: 6 mo

**Outcomes** Main study outcome: hayfever and asthma symptoms  
 Dropouts: 6 int, 6 control  
 Available outcomes: deaths, side effects  
 Response to contact: Yes

**Notes**

**Risk of bias table**

| Bias                                        | Authors' judgement | Support for judgement                                                                       |
|---------------------------------------------|--------------------|---------------------------------------------------------------------------------------------|
| Random sequence generation (selection bias) | Low risk           | Randomisation: After screening a list was given to a non-clinical investigator who randomly |

allocated subjects, treatment was blinded to clinical investigators

|                                                           |              |                                                   |
|-----------------------------------------------------------|--------------|---------------------------------------------------|
| Allocation concealment (selection bias)                   | Low risk     | As above                                          |
| Blinding of participants and personnel (performance bias) | Low risk     | Participants masked: Yes<br>Providers masked: Yes |
| Blinding of outcome assessment (detection bias)           | Low risk     | Outcome assessors masked: Yes                     |
| Incomplete outcome data (attrition bias)                  | Unclear risk |                                                   |
| Selective reporting (reporting bias)                      | Unclear risk |                                                   |
| Other bias                                                | Unclear risk |                                                   |

## Tobin 1988 <sup>136</sup>

|                      |                                                                                                                                                                                                                                                                                                                                                  |
|----------------------|--------------------------------------------------------------------------------------------------------------------------------------------------------------------------------------------------------------------------------------------------------------------------------------------------------------------------------------------------|
| <b>Methods</b>       | RCT, 3 arms (LCn3 vs more fish vs MUFA), 6 months<br>Summary risk of bias: not yet assessed                                                                                                                                                                                                                                                      |
| <b>Participants</b>  | Adults with serum cholesterol >7mmol/L on 3 occasions<br>N: ~15 LCn3 int., ~15 control<br>Level of risk for CVD: moderate<br>Location: Ireland                                                                                                                                                                                                   |
| <b>Interventions</b> | Type: supplementary capsules<br>Comparison: fish oil vs olive oil<br>Intervention 1: fish oil including 6g/d n3<br>Intervention 2: dietary regimen including 4 fish meals each week<br>Control: olive oil capsules<br><b>PUFA Dose:</b> (intended) increase 2.7%E n-3, unclear for %E LCn3, % n-6, %E PUFA<br>Duration of intervention: 6 months |
| <b>Outcomes</b>      | Main study outcome: oxidative metabolism and neutrophil superoxide<br>Available outcomes: insufficient data (abstract only), but cholesterol and TG were measured<br>Response to contact: no                                                                                                                                                     |

### Notes

### Risk of bias table

| Bias                                                      | Authors' judgement | Support for judgement |
|-----------------------------------------------------------|--------------------|-----------------------|
| Random sequence generation (selection bias)               | Unclear risk       |                       |
| Allocation concealment (selection bias)                   | Unclear risk       |                       |
| Blinding of participants and personnel (performance bias) | Unclear risk       |                       |
| Blinding of outcome assessment (detection bias)           | Unclear risk       |                       |
| Incomplete outcome data (attrition bias)                  | Unclear risk       |                       |
| Selective reporting (reporting bias)                      | Unclear risk       |                       |
| Other bias                                                | Unclear risk       |                       |

## TOHP 1 - Sacks 1994 <sup>137-145</sup>

|                      |                                                                                                                                                                                                                                                                                                                                                                                                                                     |
|----------------------|-------------------------------------------------------------------------------------------------------------------------------------------------------------------------------------------------------------------------------------------------------------------------------------------------------------------------------------------------------------------------------------------------------------------------------------|
| <b>Methods</b>       | RCT (LCn3 vs MUFA) 6 months<br>Summary risk of bias: low                                                                                                                                                                                                                                                                                                                                                                            |
| <b>Participants</b>  | People with high normal blood pressure (BP)<br>N: 175 int., 175 control<br>Level of risk for CVD: Low<br>Male: 70.9% int., 69.7% control<br>Mean age, sd: 42.6, 6.3 int., 43.1, 6.6 control<br>Age range: Unclear<br>Smokers: Unclear<br>Hypertension: None<br>Location: USA                                                                                                                                                        |
| <b>Interventions</b> | Type: supplement (capsules)<br>Intervention: Promega, purified sardine oil, capsules 6x1 g/d (3.0g EPA + DHA + DPA)<br>Control: olive oil capsules, 6x1 g/d, appearance identical to Promega capsules OR cellulose tablets, 3/d (identical to potassium supplements used in another arm of the trial)<br>Compliance: capsule counts, 72% took at least 95% capsules at 6 mo in int., 80% in control<br>Length of intervention: 6 mo |
| <b>Outcomes</b>      | Main study outcome: blood pressure<br>Dropouts: 1 int, 1 control Available outcomes: deaths, weight, lipids, BP, side effects<br>Response to contact: No                                                                                                                                                                                                                                                                            |
| <b>Notes</b>         | Note: there were also a variety of other intervention arms. No dietary, weight or smoking advice was provided to any group in this comparison                                                                                                                                                                                                                                                                                       |

#### Risk of bias table

| Bias                                                      | Authors' judgement | Support for judgement                                                                                                                                                |
|-----------------------------------------------------------|--------------------|----------------------------------------------------------------------------------------------------------------------------------------------------------------------|
| Random sequence generation (selection bias)               | Low risk           | treatment assignments obtained by phone from coordinating centre or (when phone contact not possible) from written instructions contained in sealed opaque envelopes |
| Allocation concealment (selection bias)                   | Low risk           | Adequate                                                                                                                                                             |
| Blinding of participants and personnel (performance bias) | Low risk           | Participants masked: Yes<br>Providers masked: Yes                                                                                                                    |
| Blinding of outcome assessment (detection bias)           | Low risk           | Outcome assessors masked: Yes                                                                                                                                        |
| Incomplete outcome data (attrition bias)                  | Unclear risk       |                                                                                                                                                                      |
| Selective reporting (reporting bias)                      | Unclear risk       |                                                                                                                                                                      |
| Other bias                                                | Unclear risk       |                                                                                                                                                                      |

#### Tomer 2001 146 147

|                      |                                                                                                                                                 |
|----------------------|-------------------------------------------------------------------------------------------------------------------------------------------------|
| <b>Methods</b>       | RCT (LCn3 vs MUFA), 12 months<br>Summary risk of bias: not yet assessed                                                                         |
| <b>Participants</b>  | People with sickle cell disease<br>N: 5 LCn3 int., 10 control<br>Level of risk for CVD: low<br>Location: USA                                    |
| <b>Interventions</b> | Type: supplementary capsules<br>Comparison: LCn3 vs MUFA<br>Intervention: Menhaden oil, 0.25g/kg/d as 1g capsules (assume 70kg participants, so |

17.5g/d, including 7g/d n3

Control: olive oil, 17.5g/d as 1g capsules

**PUFA Dose:** (achieved) increase 3%E n-3, 3%E LCn3, 3%E PUFA

Duration of intervention: 12 months

**Outcomes** Main study outcome: pain

Available outcomes: pain, adverse events, blood parameters including bleeding time, thrombin time, white-cell count, haemoglobin, etc, plus urea, creatinine, albumin, bilirubin, cholesterol, lactate dehydrogenase, aspartate aminotransferase, PF4, betaTG, D-dimer, PAP. Author correspondence reported no deaths, CVD events, diabetes diagnoses, cancer diagnoses.

Response to contact: yes

## Notes

### Risk of bias table

| Bias                                                      | Authors' judgement | Support for judgement                                                                             |
|-----------------------------------------------------------|--------------------|---------------------------------------------------------------------------------------------------|
| Random sequence generation (selection bias)               | Unclear risk       |                                                                                                   |
| Allocation concealment (selection bias)                   | Unclear risk       |                                                                                                   |
| Blinding of participants and personnel (performance bias) | Unclear risk       | Author correspondence reported that doctor and patient were blinded, without detail of mechanisms |
| Blinding of outcome assessment (detection bias)           | Unclear risk       | Author correspondence reported that doctor and patient were blinded, without detail of mechanisms |
| Incomplete outcome data (attrition bias)                  | Unclear risk       |                                                                                                   |
| Selective reporting (reporting bias)                      | Unclear risk       |                                                                                                   |
| Other bias                                                | Unclear risk       |                                                                                                   |

## Tremoli 1994 <sup>148</sup>

**Methods** RCT (n3 vs MUFA), 6 months  
Summary risk of bias: not yet assessed

**Participants** People with hypertriglyceridaemia  
N: ~15 int., ~15 control  
Level of risk for CVD: Moderate  
Location: Italy

**Interventions** Type: supplement (capsules?)  
Intervention: 3g/d n3  
Control: 3g/d olive oil  
**PUFA Dose:** (intended) increase 1.4%E n-3, unclear %E LCn3, 1.4%E PUFA  
Length of intervention: 24 weeks

**Outcomes** Main study outcome: tissue factor activity  
Available outcomes: haematocrit, erythrocyte, leukocyte, platelet counts, renal and liver function tests, lipids  
Response to contact: not yet attempted

## Notes

### Risk of bias table

| Bias | Authors' judgement | Support for judgement |
|------|--------------------|-----------------------|
|------|--------------------|-----------------------|

|                                                              |              |              |
|--------------------------------------------------------------|--------------|--------------|
| Random sequence generation<br>(selection bias)               | Unclear risk | A - Adequate |
| Allocation concealment (selection bias)                      | Low risk     |              |
| Blinding of participants and personnel<br>(performance bias) | Unclear risk |              |
| Blinding of outcome assessment<br>(detection bias)           | Unclear risk |              |
| Incomplete outcome data (attrition bias)                     | Unclear risk |              |
| Selective reporting (reporting bias)                         | Unclear risk |              |
| Other bias                                                   | Unclear risk |              |

## Uehara 2013 149

|                      |                                                                                                                                                                                                                                            |
|----------------------|--------------------------------------------------------------------------------------------------------------------------------------------------------------------------------------------------------------------------------------------|
| <b>Methods</b>       | RCT (LCn3 vs unclear control), 9 months<br>Summary risk of bias: not yet assessed                                                                                                                                                          |
| <b>Participants</b>  | People on statins for at least 6 months<br>N: 9 LCn3 int., 5 control<br>Level of risk for CVD: moderate<br>Location: Japan                                                                                                                 |
| <b>Interventions</b> | Type: Supplement (capsules?)<br>Comparison: LCn3 vs unclear<br>Intervention: 1.8mg/d EPA<br>Control: unclear control<br><b>PUFA Dose:</b> (intended) increase 0.8%E n-3, 0.8%E LCn3, unclear %E PUFA<br>Duration of intervention: 9 months |
| <b>Outcomes</b>      | Main study outcome: plaque stability<br>Available outcomes: fibrous cap thickness<br>Response to contact: not attempted                                                                                                                    |
| <b>Notes</b>         | Note: abstract only                                                                                                                                                                                                                        |

### Risk of bias table

| Bias                                                         | Authors' judgement | Support for judgement |
|--------------------------------------------------------------|--------------------|-----------------------|
| Random sequence generation<br>(selection bias)               | Unclear risk       |                       |
| Allocation concealment (selection bias)                      | Unclear risk       |                       |
| Blinding of participants and personnel<br>(performance bias) | Unclear risk       |                       |
| Blinding of outcome assessment<br>(detection bias)           | Unclear risk       |                       |
| Incomplete outcome data (attrition bias)                     | Unclear risk       |                       |
| Selective reporting (reporting bias)                         | Unclear risk       |                       |
| Other bias                                                   | Unclear risk       |                       |

## Vaddadi 2002 150

|                |                                                            |
|----------------|------------------------------------------------------------|
| <b>Methods</b> | RCT (total PUFA - GLA & LCn3 vs saturated fats), 24 months |
|----------------|------------------------------------------------------------|

**Participants** Summary risk of bias: not yet assessed  
 People with Huntingdon's disease  
 N: 9 int., 8 control (of whom 39 were on high polyphenols, 39 on low polyphenols)  
 Level of risk for CVD: low  
 Location: Australia

**Interventions** Type: Supplementation (capsules)  
 Comparison: total PUFA (GLA & LCn3) vs saturated fat  
 Intervention: 8 capsules or 8g/d including 560mg/d GLA, 280mg/d EPA, 160mg/d DHA with LA as carrier  
 Control: 8 capsules of coconut oil (including no PUFA)  
**PUFA Dose:** (intended) increase **0.2%E LCn3, 0.3% n-6, 3.6%E PUFA**  
 Duration of intervention: 24 months

**Outcomes** Main study outcome: progression of Huntingdon's disease  
 Available outcomes: dyskinesia (RSDRS), motor symptoms (UHDRS, including functional and capacity, behaviour, verbal fluency, symbol digit, cognitive.  
 Response to contact: not yet attempted

Notes

Risk of bias table

| Bias                                                      | Authors' judgement | Support for judgement |
|-----------------------------------------------------------|--------------------|-----------------------|
| Random sequence generation (selection bias)               | Unclear risk       |                       |
| Allocation concealment (selection bias)                   | Unclear risk       |                       |
| Blinding of participants and personnel (performance bias) | Unclear risk       |                       |
| Blinding of outcome assessment (detection bias)           | Unclear risk       |                       |
| Incomplete outcome data (attrition bias)                  | Unclear risk       |                       |
| Selective reporting (reporting bias)                      | Unclear risk       |                       |
| Other bias                                                | Unclear risk       |                       |

Veale 1994 151 152

**Methods** RCT (total PUFA - LCn3 + GLA vs non-fat) 9 months  
 Summary risk of bias: low

**Participants** People with chronic stable plaque psoriasis and inflammatory arthritis  
 N: 19 int., 19 control  
 Level of risk for CVD: Low  
 Male: 37% int., 37% control  
 Mean age, sd: median 40 in both groups  
 Age range: 18-76 int., 25-58 control  
 Smokers: Unclear  
 Hypertension: Unclear  
 Location: UK

**Interventions** Type: supplement (capsule)  
 Intervention: Efamol marine capsules, 12/d (0.4g/d EPA + DHA plus 0.5g/d gamma-linoleic acid (not omega-3))  
 Control: capsules containing liquid paraffin and vitamin E, 12/d, appeared identical  
 Compliance: no data  
 Length of intervention: 9 mo

**Outcomes** Main study outcome: skin and joint symptoms, use of NSAIDs  
 Dropouts: 4 int, 0 control  
 Available outcomes: deaths, MI, stroke, side effects  
 Response to contact: Yes

**Notes**

**Risk of bias table**

| Bias                                                      | Authors' judgement | Support for judgement                                                 |
|-----------------------------------------------------------|--------------------|-----------------------------------------------------------------------|
| Random sequence generation (selection bias)               | Low risk           | Pharmaceutical company randomised in groups of 4 using random numbers |
| Allocation concealment (selection bias)                   | Low risk           | Done, as above                                                        |
| Blinding of participants and personnel (performance bias) | Low risk           | Participants masked: Yes<br>Providers masked: Yes                     |
| Blinding of outcome assessment (detection bias)           | Low risk           | Outcome assessors masked: Yes                                         |
| Incomplete outcome data (attrition bias)                  | Unclear risk       |                                                                       |
| Selective reporting (reporting bias)                      | Unclear risk       |                                                                       |
| Other bias                                                | Unclear risk       |                                                                       |

**Wakita 2013** 153

**Methods** RCT (LCn3 vs unclear control), 8 months  
 Summary risk of bias: not yet assessed

**Participants** People with asymptomatic cerebral infarction and coronary artery disease  
 N: 20 LCn3 int., 20 control  
 Level of risk for CVD: high  
 Location: Japan

**Interventions** Type: Supplement (capsules?)  
 Comparison: LCn3 vs unclear control  
 Intervention: 1.8g/d EPA with 2g/d pitavastatin  
 Control: unclear with 2g/d pitavastatin  
**PUFA Dose:** (intended) increase **0.8%E n-3, 0.8%E LCn3, 0.8%E PUFA**  
 Duration of intervention: 8 months

**Outcomes** Main study outcome: intima media thickness  
 Available outcomes: pulsatility index  
 Response to contact: not yet attempted

**Notes** Note: abstract only

**Risk of bias table**

| Bias                                                      | Authors' judgement | Support for judgement |
|-----------------------------------------------------------|--------------------|-----------------------|
| Random sequence generation (selection bias)               | Unclear risk       |                       |
| Allocation concealment (selection bias)                   | Unclear risk       |                       |
| Blinding of participants and personnel (performance bias) | Unclear risk       |                       |
| Blinding of outcome assessment (detection bias)           | Unclear risk       |                       |



|                                          |              |
|------------------------------------------|--------------|
| Incomplete outcome data (attrition bias) | Unclear risk |
| Selective reporting (reporting bias)     | Unclear risk |
| Other bias                               | Unclear risk |

## Weisman 2011 <sup>154</sup>

|                      |                                                                                                                                                                                                                                             |
|----------------------|---------------------------------------------------------------------------------------------------------------------------------------------------------------------------------------------------------------------------------------------|
| <b>Methods</b>       | RCT crossover (LCn3 vs unclear placebo), 6 months first phase<br>Summary risk of bias: moderate to high                                                                                                                                     |
| <b>Participants</b>  | People post-MI with implantable cardioverter defibrillator<br>N: 105 LCn3 int., 105 control<br>Level of risk for CVD: high<br>Location: Israel                                                                                              |
| <b>Interventions</b> | Type: Supplement (capsules?)<br>Comparison: LCn3 vs unclear placebo<br>Intervention: 3.6g/d EPA + DHA (fish oil)<br>Control: placebo, unclear composition<br><b>PUFA Dose:</b> (intended) increase <b>1.6%E n-3, 1.6%E LCn3, 1.6%E PUFA</b> |
| <b>Outcomes</b>      | Duration of intervention: 6 months<br>Main study outcome: arrhythmia<br>Available outcomes: arrhythmic events<br>Response to contact: not yet attempted                                                                                     |
| <b>Notes</b>         | Note: abstract only                                                                                                                                                                                                                         |

### Risk of bias table

| Bias                                                      | Authors' judgement | Support for judgement   |
|-----------------------------------------------------------|--------------------|-------------------------|
| Random sequence generation (selection bias)               | Unclear risk       | "random order"          |
| Allocation concealment (selection bias)                   | Unclear risk       | unclear, no details     |
| Blinding of participants and personnel (performance bias) | Unclear risk       | none mentioned          |
| Blinding of outcome assessment (detection bias)           | Unclear risk       | none mentioned          |
| Incomplete outcome data (attrition bias)                  | Unclear risk       | attrition not discussed |
| Selective reporting (reporting bias)                      | Unclear risk       | no information          |
| Other bias                                                | Low risk           | no other issues         |

## West 2010 – NCT00510692 <sup>155-158</sup>

|                      |                                                                                                                                         |
|----------------------|-----------------------------------------------------------------------------------------------------------------------------------------|
| <b>Methods</b>       | RCT (LCn3 vs MCT), 6 months<br>Summary risk of bias: low                                                                                |
| <b>Participants</b>  | People with familial adenomatous polyposis, post-colectomy<br>N: 28 LCn3 int., 27 control<br>Level of risk for CVD: low<br>Location: UK |
| <b>Interventions</b> | Type: Supplementary capsules                                                                                                            |

Comparison: LCn3 vs MCT

Intervention: 2 x 500mg enteric coated capsules of EPA, 1g/d EPA

Control: 2x 500mg enteric coated capric and caprylic acid

**PUFA Dose:** (intended) increase 0.5%E n-3, 0.5%E LCn3, 0.5%E PUFA

Duration of intervention: 6 months

**Outcomes** Main study outcome: polyp number and size  
Available outcomes: adverse events (in trials registry in some detail). Authors report no CVD events, no deaths, and no diabetes diagnoses, but 1 cancer diagnosis in intervention arm, none in control.  
Response to contact: yes

#### Notes

#### Risk of bias table

| Bias                                                      | Authors' judgement | Support for judgement                                                                                                                            |
|-----------------------------------------------------------|--------------------|--------------------------------------------------------------------------------------------------------------------------------------------------|
| Random sequence generation (selection bias)               | Low risk           | computer-generated randomisation schedule was used to assign sequentially numbered treatment packs which were supplied randomised in blocks of 4 |
| Allocation concealment (selection bias)                   | Low risk           | As above                                                                                                                                         |
| Blinding of participants and personnel (performance bias) | Low risk           | identical capsules                                                                                                                               |
| Blinding of outcome assessment (detection bias)           | Low risk           | blinded                                                                                                                                          |
| Incomplete outcome data (attrition bias)                  | Unclear risk       |                                                                                                                                                  |
| Selective reporting (reporting bias)                      | Unclear risk       |                                                                                                                                                  |
| Other bias                                                | Unclear risk       |                                                                                                                                                  |

#### Wolf-Schnurrbusch 2015 – NCT00563979 <sup>159</sup>

**Methods** RCT (LCn3 vs nil), 12 months  
Summary risk of bias: not yet assessed

**Participants** People with age-related macular degeneration  
N: 39 LCn3 int., 40 control  
Level of risk for CVD: low  
Location: Switzerland

**Interventions** Type: Supplement (capsules)  
Comparison: supplement including LCn3 vs supplement without LCn3  
Intervention: Lutein, zeaxanthin, vitamins and minerals plus omega-3. 160mg/d omega3, 130mg/d LCn3.  
Control: Lutein, zeaxanthin, vitamins and minerals  
**PUFA Dose:** (intended) increase <0.1%E n-3, <0.1%E LCn3, <0.1%E PUFA  
Duration of intervention: 12 months

**Outcomes** Main study outcome: macular pigment density, contrast sensitivity  
Available outcomes: eye outcomes  
Response to contact: not yet attempted

#### Notes

#### Risk of bias table

| Bias | Authors' judgement | Support for judgement |
|------|--------------------|-----------------------|
|------|--------------------|-----------------------|

|                                                              |              |
|--------------------------------------------------------------|--------------|
| Random sequence generation<br>(selection bias)               | Unclear risk |
| Allocation concealment (selection<br>bias)                   | Unclear risk |
| Blinding of participants and personnel<br>(performance bias) | Unclear risk |
| Blinding of outcome assessment<br>(detection bias)           | Unclear risk |
| Incomplete outcome data (attrition<br>bias)                  | Unclear risk |
| Selective reporting (reporting bias)                         | Unclear risk |
| Other bias                                                   | Unclear risk |

## Yamano 2012 <sup>160</sup>

|                      |                                                                                                                                                                                                                                             |
|----------------------|---------------------------------------------------------------------------------------------------------------------------------------------------------------------------------------------------------------------------------------------|
| <b>Methods</b>       | RCT (LCn3 vs unclear control), 9 months<br>Summary risk of bias: not yet assessed                                                                                                                                                           |
| <b>Participants</b>  | People with acute coronary syndrome<br>N: 15 LCn3 int., 15 control<br>Level of risk for CVD: high<br>Location: Japan                                                                                                                        |
| <b>Interventions</b> | Type: Supplement (capsules)<br>Comparison: LCn3 vs unclear control<br>Intervention: EPA<br>Control: unclear<br><b>PUFA Dose:</b> (intended) increase unclear %E n-3, unclear %E LCn3, unclear %E PUFA<br>Duration of intervention: 9 months |
| <b>Outcomes</b>      | Main study outcome: fibrous cap thickness<br>Available outcomes: lipids, fibrous cap thickness<br>Response to contact: not yet attempted                                                                                                    |
| <b>Notes</b>         | Note: abstract only                                                                                                                                                                                                                         |

### Risk of bias table

| Bias                                                         | Authors'<br>judgement | Support for judgement |
|--------------------------------------------------------------|-----------------------|-----------------------|
| Random sequence generation<br>(selection bias)               | Unclear risk          |                       |
| Allocation concealment (selection<br>bias)                   | Unclear risk          |                       |
| Blinding of participants and personnel<br>(performance bias) | Unclear risk          |                       |
| Blinding of outcome assessment<br>(detection bias)           | Unclear risk          |                       |
| Incomplete outcome data (attrition<br>bias)                  | Unclear risk          |                       |
| Selective reporting (reporting bias)                         | Unclear risk          |                       |
| Other bias                                                   | Unclear risk          |                       |

## Yee 2010 <sup>161</sup>

|                |                                       |
|----------------|---------------------------------------|
| <b>Methods</b> | RCT (high LCn3 vs low LCn3), 6 months |
|----------------|---------------------------------------|

Summary risk of bias: not yet assessed

**Participants** Women at increased breast cancer risk  
N: 12 high LCn3 int., 12 moderate LCn3, 12 low-mod LCn3, 12 low LCn3 control  
Level of risk for CVD: low  
Location: USA

**Interventions** Type: Supplement (capsules)  
Comparison: high LCn3 vs low LCn3  
Intervention: 7.56g/d LCn3 (EPA+DHA), 9 capsules/d, also 6 capsules/d or 5.04g/d LCn3 and 3 capsules/d or 2.52g/d LCn3  
Control: 1 capsule/d or 0.84g/d LCn3  
**PUFA Dose:** (intended) increase **3.0%E, 1.9%E, 0.7%E LCn3 compared with 1 capsule/d**  
Duration of intervention: 6 months

**Outcomes** Main study outcome: dose effects in breast adipose tissue  
Available outcomes: lipids, platelet function, closure time, ALT  
Response to contact: not yet attempted

## Notes

## Risk of bias table

| Bias                                                      | Authors' judgement | Support for judgement |
|-----------------------------------------------------------|--------------------|-----------------------|
| Random sequence generation (selection bias)               | Unclear risk       |                       |
| Allocation concealment (selection bias)                   | Unclear risk       |                       |
| Blinding of participants and personnel (performance bias) | Unclear risk       |                       |
| Blinding of outcome assessment (detection bias)           | Unclear risk       |                       |
| Incomplete outcome data (attrition bias)                  | Unclear risk       |                       |
| Selective reporting (reporting bias)                      | Unclear risk       |                       |
| Other bias                                                | Unclear risk       |                       |

## Yoon 2015 <sup>162</sup>

**Methods** RCT, 3 arms (n3 with metformin vs metformin alone), 6 months (further arm is n3 alone)  
Summary risk of bias: not yet assessed

**Participants** Women with polycystic ovary syndrome  
N: ~27 n3 int., ~27 control  
Level of risk for CVD: low  
Location: Korea

**Interventions** Type: Supplement (capsules?)  
Comparison: n3 with metformin vs metformin alone  
Intervention: n3 with metformin, dose and composition unclear  
Control: metformin alone  
**PUFA Dose:** (intended) increase **unclear %E n-3, unclear %E LCn3**  
Duration of intervention: 6 months

**Outcomes** Main study outcome: ovarian morphology and blood flow  
Available outcomes: hormones and follicle count (others unclear)  
Response to contact: not yet attempted

**Notes** Note: abstract only

## Risk of bias table

| Bias                                                      | Authors' judgement | Support for judgement |
|-----------------------------------------------------------|--------------------|-----------------------|
| Random sequence generation (selection bias)               | Unclear risk       |                       |
| Allocation concealment (selection bias)                   | Unclear risk       |                       |
| Blinding of participants and personnel (performance bias) | Unclear risk       |                       |
| Blinding of outcome assessment (detection bias)           | Unclear risk       |                       |
| Incomplete outcome data (attrition bias)                  | Unclear risk       |                       |
| Selective reporting (reporting bias)                      | Unclear risk       |                       |
| Other bias                                                | Unclear risk       |                       |

## Zhu 2008 <sup>163</sup>

**Methods** RCT (seal oil LCn3 vs unclear placebo), 6 months  
Summary risk of bias: not yet assessed

**Participants** People with non-alcoholic fatty liver disease (NAFLD)  
N: 72 LCn3 int., 72 control  
Level of risk for CVD: low  
Location: China

**Interventions** Type: Supplement (capsules)  
Comparison: seal oil LCn3 vs unclear placebo  
Intervention: 2g of omega-3 PUFA from seal oil 3x/d or 6g/d LCn3, plus recommended diet (50% CHO, 20% protein, 30% fat, those overweight to lose weight)  
Control: 2g of placebo 3x/d or 6g/d placebo, plus recommended diet (50% CHO, 20% protein, 30% fat, those overweight to lose weight)  
**PUFA Dose:** (intended) increase **2.7%E n-3, 2.7%E LCn3, unclear %E PUFA**  
Duration of intervention: 24 weeks

**Outcomes** Main study outcome: fatty liver  
Available outcomes: fatty liver progression, lipids, liver function tests, adverse events, body weight, fasting blood glucose, blood cells  
Response to contact: not yet attempted

## Notes

## Risk of bias table

| Bias                                                      | Authors' judgement | Support for judgement |
|-----------------------------------------------------------|--------------------|-----------------------|
| Random sequence generation (selection bias)               | Unclear risk       |                       |
| Allocation concealment (selection bias)                   | Unclear risk       |                       |
| Blinding of participants and personnel (performance bias) | Unclear risk       |                       |
| Blinding of outcome assessment (detection bias)           | Unclear risk       |                       |
| Incomplete outcome data (attrition bias)                  | Unclear risk       |                       |

Selective reporting (reporting bias)

Unclear risk

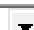

Other bias

Unclear risk



Total 91 studies, 8 Trials registry entries, 159 published papers, abstracts and author contacts.

## References

1. Annuzzi G, Bozzetto L, Pacini G, et al. Effects of dietary polyphenols and/or long-chain N-3 pufa on glucose metabolism in people at high cardiovascular risk: A controlled, randomized intervention. *Diabetes* 2014;63:A15-A16.
2. Bozzetto L, Alderisio A, Giorgini M, et al. Extra-Virgin Olive Oil Reduces Glycemic Response to a High-Glycemic Index Meal in Patients With Type 1 Diabetes: A Randomized Controlled Trial. *Diabetes Care* 2016;39(4):518-24.
3. Bozzetto L, Annuzzi G, Pacini G, et al. Polyphenol-rich diets improve glucose metabolism in people at high cardiometabolic risk: a controlled randomised intervention trial. *Diabetologia* 2015;58(7):1551-60.
4. Huang LL, Coleman HR, Kim J, et al. Oral supplementation of lutein/zeaxanthin and omega-3 long chain polyunsaturated fatty acids in persons aged 60 years or older, with or without AMD. *Invest Ophthalmol Vis Sci* 2008;49(9):3864-69.
5. Chew E. Personal communication, 2011.
6. Bairati I. Personal communication. 2011
7. Bairati I, Roy L, Meyer F. Double-blind, randomized, controlled trial of fish oil supplements in prevention of recurrence of stenosis after coronary angioplasty. *Circulation* 1992;85(3):950-56.
8. Bairati I, Roy L, Meyer F. Effects of a fish oil supplement on blood pressure and serum lipids in patients treated for coronary artery disease. *Can J Cardiol* 1992;8(1):41-46.
9. Bairati I, Roy L, Meyer F. Measurement errors in standard visual analysis of coronary angiograms: consequences on clinical trials. *Can J Cardiol* 1993;9(3):225-30.
10. Meyer F, Bairati I, Roy L. Preventing restenosis after angioplasty with fish oil supplements. *Cardiology Board Review* 1993;10(1):16+23-16+25.
11. Roy L, Bairati I, Meyer F. Double blind randomised controlled trial of fish oil supplements in the prevention of restenoses after coronary angioplasty. *Circulation* 1991;84 (supplement II):365.
12. Bellamy CM, Schofield PM, Faragher EB, et al. Can supplementation of diet with omega-3 polyunsaturated fatty acids reduce coronary angioplasty restenosis rate? *Eur Heart J* 1992;13(12):1626-31.
13. Bhargava R, Kumar P. Oral omega-3 fatty acid treatment for dry eye in contact lens wearers. *Cornea* 2015;34(4):413-20.
14. Bhargava R, Chandra M, Bansal U, et al. A Randomized Controlled Trial of Omega 3 Fatty Acids in Rosacea Patients with Dry Eye Symptoms. *Curr Eye Res* 2016:1-7.
15. Bianconi L, Calo L, Mennuni M, et al. n-3 polyunsaturated fatty acids for the prevention of arrhythmia recurrence after electrical cardioversion of chronic persistent atrial fibrillation: a randomized, double-blind, multicentre study. *Europace* 2011;13(2):174-81.
16. Bierenbaum ML, Green DP, Gherman C, et al. The effects of two low fat dietary patterns on the blood cholesterol level of young male coronary patients. *Journal of Chronic Diseases* 1963;16(10):1073-83.
17. Blommers J, de Lange-De Klerk ES, Kuik DJ, et al. Evening primrose oil and fish oil for severe chronic mastalgia: a randomized, double-blind, controlled trial. *Am J Obstet Gynecol* 2002;187(5):1389-94.
18. de Lange de Klerk ESM. Personal communication. 2011
19. Borchgrevink CF. Personal communication. 2001
20. Borchgrevink CF, Berg KJ, Skaga E, et al. Effect of linseed oil on platelet adhesiveness and bleeding time in patients with coronary heart disease. *Lancet* 1965;ii:980-82.
21. Borchgrevink CF, Skaga E, Berg KJ, et al. Absence of prophylactic effect of linolenic acid in patients with coronary heart-disease. *Lancet* 1966;2(7456):187-89.

22. Johansen O, Seljeflot I, Hostmark AT, et al. The effect of supplementation with omega-3 fatty acids on soluble markers of endothelial function in patients with coronary heart disease. *Arterioscler Thromb Vasc Biol* 1999;19(7):1681-86.
23. Johansen O, Brekke M, Seljeflot I, et al. N-3 fatty acids do not prevent restenosis after coronary angioplasty: results from the CART study. Coronary Angioplasty Restenosis Trial. *J Am Coll Cardiol* 1999;33(6):1619-26.
24. Seljeflot I, Johansen O, Arnesen H, et al. Procoagulant activity and cytokine expression in whole blood cultures from patients with atherosclerosis supplemented with omega-3 fatty acids. *Thromb Haemost* 1999;81(4):566-70.
25. Chen R, Guo Q, Zhu WJ, et al. Therapeutic efficacy of omega-3 polyunsaturated fatty acid capsule in treatment of patients with non-alcoholic fatty liver disease. [Chinese]. *World Chinese Journal of Digestology* 2008;16(18):2002-06.
26. Peters NC, Contento IR, Kronenberg F, et al. Adherence in a 1-year whole foods eating pattern intervention with healthy postmenopausal women. *Public Health Nutr* 2014;17(12):2806-15.
27. Chrysohoou C, Metallinos G, Georgiopoulos G, et al. Short term omega-3 polyunsaturated fatty acid supplementation induces favorable changes in right ventricle function and diastolic filling pressure in patients with chronic heart failure; A randomized clinical trial. *Vascul Pharmacol* 2016;79:43-50.
28. Chrysohoou C. Personal communication. 2016
29. Thomashow MA, Yip NH, Parikh M, et al. Randomization to omega-3 polyunsaturated fatty acid supplementation and endothelial function in chronic obstructive pulmonary disease: the COD-Fish pilot randomized controlled trial (Abstract). *Am J Respir Crit Care Med* 2014;189:A6016.
30. Colli MC, Bracht A, Soares AA, et al. Evaluation of the efficacy of flaxseed meal and flaxseed extract in reducing menopausal symptoms. *J med food* 2012;15(9):840-45.
31. DREAM Study Research Group. *New England Journal of Medicine* 2018;378(18):1681-90.
32. Nct. Dry eye assessment and management study (DREAM). [clinicaltrials.gov/ct2/show/NCT02128763](https://clinicaltrials.gov/ct2/show/NCT02128763), 2014.
33. Dry J, Vincent D. Effect of a fish oil diet on asthma: results of a 1-year double-blind study. *Int Arch Allergy Applied Immunol* 1991;95(2-3):156-57.
34. Vincent D. Personal communication, 2001.
35. Duffy EM, Meenagh GK, McMillan SA, et al. The clinical effect of dietary supplementation with omega-3 fish oils and/or copper in systemic lupus erythematosus. *J Rheumatol* 2004;31(8):1551-56.
36. El Khouli AM, El-Gendy EA. Efficacy of omega-3 in treatment of recurrent aphthous stomatitis and improvement of quality of life: a randomized, double-blind, placebo-controlled study. *Oral Surg Oral Med Oral Pathol Oral Radiol* 2014;117(2):191-96.
37. Maresta A, Balducci M, Varani E, et al. Prevention of postcoronary angioplasty restenosis by omega-3 fatty acids: main results of the Esapent for Prevention of Restenosis Italian Study (ESPRIT). *Am Heart J* 2002;143(6):E5.
38. Maresta A. Personal communication, 2003.
39. DeFilippis AP, Harper CR, Cotsonis GA, et al. Effect of baseline plasma fatty acids on eicosapentaenoic acid levels in individuals supplemented with alpha-linolenic acid. *Int J Food Sci Nutr* 2009;60 Suppl 5:28-37.
40. Harper CR, Edwards MC, Jacobson TA. Flaxseed oil supplementation does not affect plasma lipoprotein concentration or particle size in human subjects. *J Nutr* 2006;136(11):2844-48.
41. Leaf A, Jorgensen MB, Jacobs AK, et al. Do fish oils prevent restenosis after coronary angioplasty? *Circulation* 1994;90(5):2248-57.
42. Mehta VY, Jorgensen MB, Raizner AE, et al. Spontaneous regression of restenosis: an angiographic study. *J Am Coll Cardiol* 1995;26(3):696-702.
43. Leaf A. Personal communication, 2000.
44. Galarraga B, Ho M, Youssef HM, et al. Cod liver oil (n-3 fatty acids) as a non-steroidal anti-inflammatory drug sparing agent in rheumatoid arthritis. *Rheumatology (Oxford)* 2008;47(5):665-69.
45. Garcia-Medina JJ, Garcia-Medina M, Garrido-Fernandez P, et al. A 2-year follow-up of antioxidant supplementation in primary open-angle glaucoma. *Ophthalmic Research* 2011;46 (4):238.
46. Garcia-Medina JJ, Garcia-Medina M, Garrido-Fernandez P, et al. A two-year follow-up of oral antioxidant supplementation in primary open-angle glaucoma: an open-label, randomized, controlled trial. *Acta Ophthalmol (Oxf)* 2015;93(6):546-54.
47. Geusens P, Wouters C, Nijs J, et al. Long-term effect of omega-3 fatty acid supplementation in active rheumatoid arthritis. A 12-month, double-blind, controlled study. *Arthritis Rheum* 1994;37(6):824-29.

48. Ghadian AR, M. Combination therapy with omega-3 fatty acids plus tamsulocin and finasteride in the treatment of men with lower urinary tract symptoms (LUTS) and benign prostatic hyperplasia (BPH). *Inflammopharmacology* 2017;25(4):451-58. doi: 10.1007/s10787-017-0343-2
49. Hamazaki K, Itomura M, Hamazaki T, et al. Effects of cooking plant oils on recurrent aphthous stomatitis: a randomized, placebo-controlled, double-blind trial. *Nutrition* 2006;22(5):534-38.
50. Hansen AL, Dahl L, Bakke L, et al. Fish consumption and heart rate variability: Preliminary results. *J Psychophysiol* 2010;24(1):41-47.
51. Hansen A. Personal communication, 2011.
52. Harbige LS, Sharief MK. Polyunsaturated fatty acids in the pathogenesis and treatment of multiple sclerosis. *Br J Nutr* 2007;98 Suppl 1:S46-S53.
53. Harris WS, Windsor SL. N-3 fatty acid supplements reduce chylomicron levels in healthy volunteers. *Journal of applied nutrition* 1991;43(1):5-15.
54. Henz BM, Jablonska S, van de Kerkhof PC, et al. Double-blind, multicentre analysis of the efficacy of borage oil in patients with atopic eczema. *Br J Dermatol* 1999;140(4):685-88.
55. Holguin F, Tellez-Rojo MM, Lazo M, et al. Cardiac autonomic changes associated with fish oil vs soy oil supplementation in the elderly. *Chest* 2005;127(4):1102-07.
56. Horrobin DF. Essential fatty acids in the management of impaired nerve function in diabetes. *Diabetes* 1997;46 Suppl 2:S90-S93.
57. Domei T, Amemiya K, Enomoto S, et al. Eicosapentaenoic acid reduced the progression of the coronary atherosclerosis in the patients with optimal LDL cholesterol lowering therapy. *Eur Heart J* 2013;34:137.
58. Jamal GA, Carmichael H, Weir AI. Gamma-linolenic acid in diabetic neuropathy. *Lancet* 1986;1(8489):1098.
59. Dyer O. Doctor accused of giving false information to drug trial. *Br Med J* 2002;325(7365):618.
60. Jenkins AP, Green AT, Thompson RP. Essential fatty acid supplementation in chronic hepatitis B. *Aliment Pharmacol Ther* 1996;10(4):665-68.
61. Khan F, Elherik K, Bolton-Smith C, et al. The effects of dietary fatty acid supplementation on endothelial function and vascular tone in healthy subjects. *Cardiovascular Research* 2003;59(4):955-62.
62. Kojuri J, Ostovan MA, Rezaian GR, et al. Effect of omega-3 on brain natriuretic peptide and echocardiographic findings in heart failure: Double-blind placebo-controlled randomized trial. *J Cardiovasc Dis Res* 2013;4(1):20-24.
63. Kokke KH, Morris JA, Lawrenson JG. Oral omega-6 essential fatty acid treatment in contact lens associated dry eye. *Contact lens anterior eye* 2008;31(3):141-46.
64. Koziolova N, Polyanskaya E, Shilova Y, et al. Dynamics of structure and function of arterial wall in patients with permanent atrial fibrillation after treatment with omega-3 unsaturated fatty acids. *Atherosclerosis* 2015;241(1):e228.
65. Kurabayashi T, Okada M, Tanaka K. Eicosapentaenoic acid effect on hyperlipidemia in menopausal Japanese women. The Niigata Epadel Study Group. *Obstet Gynecol* 2000;96(4):521-28.
66. Tanaka K. Personal communication, 2011.
67. Lau CS, McLaren M, Belch JJ. Effects of fish oil on plasma fibrinolysis in patients with mild rheumatoid arthritis. *Clin Exp Rheumatol* 1995;13(1):87-90.
68. Lau CS. Personal communication, 2001.
69. Malaguarnera M, Restuccia N, Di Fazio I, et al. Fish oil treatment of interferon-alpha-induced dyslipidaemia: Study in patients with chronic hepatitis C. *BioDrugs* 1999;11(4):285-91.
70. Masterton G, Shams A, Walsh J, et al. A clinical trial investigating the effect of omega-3 fatty acids on non-alcoholic fatty liver disease. *Gut* 2015;64:A256.
71. McKew JR, Millar AM, Wright SA, et al. Beneficial effects of omega-3-polyunsaturated fatty acids on SF-36 scores in systemic lupus erythematosus. *Rheumatology (United Kingdom)* 2012;51:iii158.
72. Mehta SP, Boddy AP, Cook J, et al. Effect of n-3 polyunsaturated fatty acids on Barrett's epithelium in the human lower esophagus. *Am J Clin Nutr* 2008;87(4):949-56.
73. Johnson IT. Personal communication, 2011.
74. Meyer BJ, Hammervold T, Rustan AC, et al. Dose-dependent effects of docosahexaenoic acid supplementation on blood lipids in statin-treated hyperlipidaemic subjects. *Lipids* 2007;42(2):109-15.
75. Meyer BJ, Lane AE, Mann NJ. Comparison of seal oil to tuna oil on plasma lipid levels and blood pressure in hypertriglyceridaemic subjects. *Lipids* 2009;44(9):827-35.
76. Howe P. Personal communication, 2011.



77. Millar JH, Zilkha KJ, Langman MJ, et al. Double-blind trial of linoleate supplementation of the diet in multiple sclerosis. *Br Med J* 1973;1(5856):765-68.
78. Milner MR, Gallino RA, Leffingwell A, et al. Usefulness of fish oil supplements in preventing clinical evidence of restenosis after percutaneous transluminal coronary angioplasty. *Am J Cardiol* 1989;64(5):294-99.
79. Milner MR, Gallino RA, Leffingwell A, et al. High dose omega-3 fatty acid supplementation reduces clinical restenosis after coronary angioplasty [abstract]. *Circulation* 1988;78:II634-II34.
80. Querques G, Benlian P, Chanu B, et al. Nutritional AMD treatment phase I (NAT-1): Feasibility of oral DHA supplementation in age-related macular degeneration. *Eur J Ophthalmol* 2009;19(1):100-06.
81. Querques G. Personal communication, 2011.
82. Neubronner J, Schuchardt JP, Kressel G, et al. Enhanced increase of omega-3 index in response to long-term n-3 fatty acid supplementation from triacylglycerides versus ethyl esters. *Eur J Clin Nutr* 2011;65(2):247-54.
83. Schuchardt JP, Neubronner J, Block RC, et al. Associations between Omega-3 Index increase and triacylglyceride decrease in subjects with hypertriglyceridemia in response to six month of EPA and DHA supplementation. *Prostaglandins Leukot Essent Fatty Acids* 2014;91(4):129-34.
84. Neubronner J. Personal communication, 2011.
85. Njike VYY, N.; Petraro, P.; Ayettey, R.G.; Treu, J.A.; Katz, D.L. Inclusion of walnut in the diets of adults at risk for type 2 diabetes and their dietary pattern changes: a randomized, controlled, cross-over trial. *BMJ Open Diabetes Res* 2016;4:e000293.
86. Nosratzahi TA, A. Efficacy of omega-3 in treatment of recurrent aphthous stomatitis: a randomised, double-blind, placebo-controlled study. *Chinese Journal of Dental Research* 2016;19(3):159-64. doi: 10.3290/j.cjdr.a36681
87. Oliwiecki S, Burton JL. Evening primrose oil and marine oil in the treatment of psoriasis. *Clin Exp Dermatol* 1994;19(2):127-29.
88. Palozza P, Sgarlata E, Luberto C, et al. n-3 fatty acids induce oxidative modifications in human erythrocytes depending on dose and duration of dietary supplementation. *Am J Clin Nutr* 1996;64(3):297-304.
89. Parulkar M, Dawson DR, Kryscio R, et al. Lack of effect of omega-3 fatty acid (PUFA) dietary supplement on clinical measures of periodontitis in humans. *The FASEB Journal Conference: Experimental Biology* 2009;23(S1)
90. Urakawa S, Kohno K, Miyoshi T, et al. Effect of pitavastatin and eicosapentaenoic acid on coronary artery calcification detected by multi detector-row computed tomography. *Eur Heart J* 2014;35:452.
91. Pinheiro MN, dos Santos PM, dos Santos RCR, et al. Oral flaxseed oil (*Linum usitatissimum*) in the treatment for dry-eye Sjögren's syndrome patients. *Arq Bras Oftalmol* 2007;70(4):649-55.
92. Pinheiro MN. Personal communication, 2011.
93. Pinna A, Piccinini P, Carta F. Effect of oral linoleic and gamma-linolenic acid on meibomian gland dysfunction. *Cornea* 2007;26(3):260-64.
94. Purewal TS, Evans PMS, Harvard F, et al. Lack of effect of evening primrose oil on autonomic function tests after 12 months of treatment [abstract]. *Diabetologia* 1997;40(Suppl):2186.
95. Puri BK, Bydder GM, Counsell SJ, et al. MRI and neuropsychological improvement in Huntington disease following ethyl-EPA treatment. *Neuroreport* 2002;13(1):123-26.
96. Puri BK. Personal communication, 2011.
97. Reis GJ. Fish oil supplements raise LDL cholesterol: results of a blinded, placebo-controlled trial in patients with coronary disease [abstract]. *Circulation (Supp)* 1988;78(4):II385.
98. Reis GJ, Boucher TM, McCabe CH. Results of a randomised, double blind placebo controlled trial of fish oil for prevention of restenosis after PTCA [abstract]. *Circulation* 1988;78 (supplement 2):291-91.
99. Reis GJ, Boucher TM, Sipperly ME, et al. Randomised trial of fish oil for prevention of restenosis after coronary angioplasty. *Lancet* 1989;2(8656):177-81.
100. Reis GJ, Kuntz RE, Silverman DI, et al. Effects of serum lipid levels on restenosis after coronary angioplasty. *Am J Cardiol* 1991;68(15):1431-35.
101. Reis GJ, Silverman DI, Boucher TM, et al. Effects of two types of fish oil supplements on serum lipids and plasma phospholipid fatty acids in coronary artery disease. *Am J Cardiol* 1990;66(17):1171-75.
102. Sipperly ME, Reis GJ, Boucher TM, et al. Predictors of patient compliance in a placebo-controlled trial of fish oil [abstract]. *Circulation* 1988;78:II614-II14.
103. Rezapour-Firouzi S, Arefhosseini SR, Ebrahimi-Mamaghani M, et al. Alteration of delta-6-desaturase (FADS2), secretory phospholipase-A2 (sPLA2) enzymes by Hot-nature diet with co-supplemented hemp seed, evening primrose oils intervention in multiple sclerosis patients. *Complementary Therapies in Medicine* 2015;23(5):652-57.

104. Rezapour-Firouzi S, Arefhosseini SR, Ebrahimi-Mamaghani M, et al. Activity of liver enzymes in multiple sclerosis patients with Hot-nature diet and co-supplemented hemp seed, evening primrose oils intervention. *Complementary Therapies in Medicine* 2014;22(6):986-93.
105. Rezapour-Firouzi S, Arefhosseini SR, Ebrahimi-Mamaghani M, et al. Erythrocyte membrane fatty acids in multiple sclerosis patients and hot-nature dietary intervention with co-supplemented hemp-seed and evening-primrose oils. *Afr J Tradit Complement Altern Med* 2013;10(6):519-27.
106. Rezapour-Firouzi S, Arefhosseini SR, Mehdi F, et al. Immunomodulatory and therapeutic effects of Hot-nature diet and co-supplemented hemp seed, evening primrose oils intervention in multiple sclerosis patients. *Complementary Therapies in Medicine* 2013;21(5):473-80.
107. Rezapour-Firouzi S, Rafie S, Farhoudi M, et al. Regulation of lipid-dependent membrane enzymes by Hot nature diet with co-supplemented hemp seed, evening primrose oils intervention in multiple sclerosis patients. *Journal of Pure and Applied Microbiology* 2013;7(4):2891-901.
108. Rocha Filho EA, Lima JC, Pinho Neto JS, et al. Essential fatty acids for premenstrual syndrome and their effect on prolactin and total cholesterol levels: a randomized, double blind, placebo-controlled study. *Reproductive Health* 2011;8:2.
109. Rodrigues L, Oliveira CP, Stefano JT, et al. Omega-3 fatty acids improve proteomic and lipidomic markers of endoplasmic reticulum (ER) stress and mitochondrial dysfunction in a randomized controlled trial in subjects with Nonalcoholic Steatohepatitis. *Hepatology* 2015;62:333A.
110. Sabate J, Cordero-Macintyre Z, Siapco G, et al. Does regular walnut consumption lead to weight gain? *Br J Nutr* 2005;94(5):859-64.
111. Segovia-Siapco G, Singh P, Jaceldo-Siegl K, et al. Validation of a food-frequency questionnaire for measurement of nutrient intake in a dietary intervention study. *Public Health Nutr* 2007;10(2):177-84.
112. Simon JA, Tanzman JS, Sabate J. Lack of effect of walnuts on serum levels of prostate specific antigen: a brief report. *J Am Coll Nutr* 2007;26(4):317-20.
113. Segovia-Siapco G. Personal communication, 2011.
114. Safarinejad M. Effect of omega-3 polyunsaturated fatty acid supplementation on semen profile and enzymatic antioxidant capacity of seminal plasma in infertile men with idiopathic oligoasthenoteratospermia: A double blind, placebocontrolled, randomized study. *Urology* 2009;74 (4 SUPPL S):S96.
115. Safarinejad M. Efficacy and safety of omega-3 for treatment of early stage peyronie's disease: A prospective, randomized, doubleblind placebocontrolled study. *Urology* 2009;74 (4 SUPPL S):S328.
116. Safarinejad M. Personal communication, 2011.
117. Sarkkinen ES, Agren JJ, Ahola I, et al. Fatty acid composition of serum cholesterol esters, and erythrocyte and platelet membranes as indicators of long-term adherence to fat-modified diets. *Am J Clin Nutr* 1994;59(2):364-70.
118. Sarkkinen ES, Uusitupa MI, Gylling H, et al. Fat-modified diets influence serum concentrations of cholesterol precursors and plant sterols in hypercholesterolemic subjects. *Metabolism* 1998;47(6):744-50.
119. Sarkkinen ES, Uusitupa MI, Pietinen P, et al. Long-term effects of three fat-modified diets in hypercholesterolemic subjects. *Atherosclerosis* 1994;105:9-23.
120. Makinen E, Uusitupa MI, Pietinen P, et al. Long term effects of three fat modified diets on serum lipids in free living hypercholesterolemic subjects [abstract]. *Eur Heart J* 1991;12:168-68.
121. Sarkkinen E. Personal communication, 2000.
122. Sarkkinen ES, Uusitupa MI, Nyyssonen K, et al. Effects of two low-fat diets, high and low in polyunsaturated fatty acids, on plasma lipid peroxides and serum vitamin E levels in free-living hypercholesterolaemic men. *Eur J Clin Nutr* 1993;47(9):623-30.
123. Schaefer EJ, Lichtenstein AH, Lamon FS, et al. Effects of National Cholesterol Education Program Step 2 diets relatively high or relatively low in fish-derived fatty acids on plasma lipoproteins in middle-aged and elderly subjects. *Am J Clin Nutr* 1996;63(2):234-41.
124. Selvais PL, Ketelslegers JM, Buysschaert M, et al. Plasma endothelin-1 immunoreactivity is increased following long-term dietary supplementation with omega-3 fatty acids in microalbuminuric IDDM patients. *Diabetologia* 1995;38:253-53.
125. Hermans MP. Personal communication. 2000
126. Selvais PL. Personal communication, 2000.
127. Sheppard JD, Jr., Singh R, McClellan AJ, et al. Long-term Supplementation With n-6 and n-3 PUFAs Improves Moderate-to-Severe Keratoconjunctivitis Sicca: A Randomized Double-Blind Clinical Trial. *Cornea* 2013;32(10):1297-304.

128. Shevel'yok A, Vatutin N, Kalinkina N, et al. Omega-3 polyunsaturated fatty acids reduce the atrial late potentials rate in patients with paroxysmal atrial fibrillation. *European Journal of Preventive Cardiology* 2013;1):S62.
129. Singer P, Wirth M. Can n-3 PUFA reduce cardiac arrhythmias? Results of a clinical trial. *Prostaglandins Leukot Essent Fatty Acids* 2004;71(3):153-59.
130. Slack JD, Pinkerton CA, Van Tassel J, et al. Can oral fish oil supplement minimise restenosis after percutaneous transluminal coronary angioplasty? [abstract]. *J Am Coll Cardiol* 1987;9:64-64.
131. Stainforth JM, Layton AM, Goodfield MJ. Clinical aspects of the use of gamma linolenic acid in systemic sclerosis. *Acta Dermato-Venereologica* 1996;76(2):144-46.
132. Tani S, Nagao K, Matsumoto M, et al. Highly purified eicosapentaenoic acid may increase low-density lipoprotein particle size by improving triglyceride metabolism in patients with hypertriglyceridemia. *Circ J* 2013;77(9):2349-57.
133. Theander E, Horrobin DF, Jacobsson LT, et al. Gammalinolenic acid treatment of fatigue associated with primary Sjogren's syndrome. *Scandinavian Journal of Rheumatology* 2002;31(2):72-79.
134. Thien FC, Mencia HJ, Lee TH. Dietary fish oil effects on seasonal hay fever and asthma in pollen-sensitive subjects. *Am Rev Respir Dis* 1993;147(5):1138-43.
135. Thien FC. Personal communication, 2000.
136. Tobin A, Clarke R. Therapeutic effects of fish oil supplementation in hyperlipidaemia [abstract]. *Ir J Med Sci* 1988;157(9):301-01.
137. Sacks FM, Hebert P, Appel LJ, et al. The effect of fish oil on blood pressure and high-density lipoprotein-cholesterol levels in phase I of the Trials of Hypertension Prevention. Trials of Hypertension Prevention Collaborative Research Group. *J Hypertens Suppl* 1994;12(7):S23-S31.
138. Sacks FM, Hebert P, Appel LJ, et al. Short report: the effect of fish oil on blood pressure and high-density lipoprotein-cholesterol levels in phase I of the Trials of Hypertension Prevention. *J Hypertens* 1994;12(2):209-13.
139. Meilahn EN, Kuller LH, Kiss JE, et al. Coagulation parameters among healthy adults taking fish oil versus placebo. *Arteriosclerosis* 1990;10:916A-16A.
140. He J, Klag MJ, Appel LJ, et al. Seven-year incidence of hypertension in a cohort of middle-aged African Americans and whites. *Hypertension* 1998;31(5):1130-35.
141. Satterfield S, Borhani NO, Whelton P, et al. Recruitment for phase I of the Trials of Hypertension Prevention. *Am J Prev Med* 1993;9(4):237-43.
142. Whelton PK, Kumanyika SK, Cook NR, et al. Efficacy of nonpharmacologic interventions in adults with high-normal blood pressure: results from phase 1 of the Trials of Hypertension Prevention. *Am J Clin Nutr* 1997;65(2 Suppl):652S-60S.
143. Trials of Hypertension Prevention Collaborative Research Group. The effects of nonpharmacologic interventions on blood pressure of persons with high normal levels. Results of the Trials of Hypertension Prevention, phase I. *Jama* 1992;267(9):1213-20.
144. Sacks FM. Personal communication, 2000.
145. Satterfield S, Cutler JA, Langford HG, et al. Trials of hypertension prevention. Phase I design. *Annals of epidemiology* 1991;1(5):455-71.
146. Tomer A, Kasey S, Connor WE, et al. Reduction of pain episodes and prothrombotic activity in sickle cell disease by dietary n-3 fatty acids. *Thromb Haemost* 2001;85(6):966-74.
147. Tomer A. Personal communication, 2011.
148. Tremoli E, Eligini S, Colli S, et al. n-3 Fatty acid ethyl ester administration to healthy subjects and to hypertriglyceridemic patients reduces tissue factor activity in adherent monocytes. *Arteriosclerosis and Thrombosis* 1994;14(10):1600-08.
149. Uehara H, Miyagi N, Shimajiri M, et al. The additional effect of Eicosapentanoic acid on coronary plaque stability in stable angina patients with statin use by Optical Coherence Tomography analysis. *Eur Heart J* 2013;34:1011.
150. Vaddadi KS, Soosai E, Chiu E, et al. A randomised, placebo-controlled, double blind study of treatment of Huntington's disease with unsaturated fatty acids.[Erratum appears in Neuroreport 2002 Feb;13(2):inside back cover]. *Neuroreport* 2002;13(1):29-33.
151. Veale DJ, Torley HI, Richards IM, et al. A double-blind placebo controlled trial of Efamol Marine on skin and joint symptoms of psoriatic arthritis. *Br J Rheumatol* 1994;33(10):954-58.
152. Belch JFF. Personal communication, 2001.

153. Wakita Y, Wakida Y, Itou T, et al. High purity eicosapentaenoic acid in addition to a strong statin makes regression of intima-media thickness in patients with asymptomatic cerebral infarction. *Stroke Conference* 2013;44(2 MeetingAbstract)
154. Weisman D, Glikson M, Goldbourt U, et al. Effect of supplemented intake of docosahexaenoic and eicosapentaenoic fatty acids on ventricular arrhythmias in coronary heart disease patient's with implantable cardioverter defibrillator. *J Am Coll Cardiol* 2011;1):E139.
155. West NJ, Clark SK, Belluzzi A, et al. Eicosapentaenoic acid (EPA) free fatty acid reduces polyp burden in familial adenomatous polyposis (FAP): Results of a randomised, placebo-controlled trial. *Gastroenterology* 2010;1):S79.
156. West NJ. Personal communication, 2011.
157. West NJ, Clark SK, Belluzzi A, et al. Eicosapentaenoic acid free fatty acid (EPA-FFA) reduces the number of rectal polyps in familial adenomatous polyposis (FAP). *Familial Cancer* 2011;10:S15-S16.
158. West NJ, Clark SK, Phillips RK, et al. Eicosapentaenoic acid reduces rectal polyp number and size in familial adenomatous polyposis. *Gut* 2010;59(7):918-25.
159. Wolf-Schnurrbusch UE, Zinkernagel MS, Munk MR, et al. Oral Lutein Supplementation Enhances Macular Pigment Density and Contrast Sensitivity but Not in Combination With Polyunsaturated Fatty Acids. *Invest Ophthalmol Vis Sci* 2015;56(13):8069-74.
160. Yamano T, Wada T, Nishiguchi T, et al. The impact of ethyl icosapentate therapy on coronary fibrous-cap thickness in acute coronary syndrome patients without hyperlipidemia: Assessment by optical coherence tomography study. *Eur Heart J* 2013;34:706.
161. Yee LD, Lester JL, Cole RM, et al. Omega-3 fatty acid supplements in women at high risk of breast cancer have dose-dependent effects on breast adipose tissue fatty acid composition. *Am J Clin Nutr* 2010;91(5):1185-94.
162. Yoon JW, Kim CH, Ahn JW, et al. Effect of omega-3-polyunsaturated fatty acids and metformin on ovarian morphology and intraovarian blood flow in patients with polycystic ovary syndrome. *Fertility and Sterility* 2010;1):S194.
163. Zhu FS, Liu S, Chen XM, et al. Effects of n-3 polyunsaturated fatty acids from seal oils on nonalcoholic fatty liver disease associated with hyperlipidemia. *World Journal of Gastroenterology* 2008;14(41):6395-400.
